# A network meta-analysis of the efficacy of hypoxia-inducible factor prolyl-hydroxylase inhibitors in dialysis chronic kidney disease

Jun Chen<sup>1</sup>, Xinyang Shou<sup>1</sup>, Yanyan Xu<sup>2</sup>, Lie Jin<sup>3</sup>, Chaoyong Zhu<sup>3</sup>, Xiaolan Ye<sup>4</sup>, Ziwei Mei<sup>2,&</sup>,  
Peipei Chen<sup>2</sup>

<sup>1</sup>Zhejiang Chinese Medical University, First Clinical Medical College, Hangzhou, Zhejiang 310000, China

<sup>2</sup>Department of Pharmaceutical, Lishui Municipal Central Hospital, The Fifth Affiliated Hospital of Wenzhou Medical University, Lishui, Zhejiang 323000, China

<sup>3</sup>Department of Nephrology, Lishui Municipal Central Hospital, The Fifth Affiliated Hospital of Wenzhou Medical University, Lishui, Zhejiang 323000, China

<sup>4</sup>Department of Pharmaceutical, Zhejiang Provincial People's Hospital, Hangzhou, Zhejiang 310000, China

**Correspondence to:** Peipei Chen, Ziwei Mei; email: [lszyycpp@163.com](mailto:lszyycpp@163.com), <https://orcid.org/0009-0008-3200-3173>; [lszyymzw@163.com](mailto:lszyymzw@163.com), <https://orcid.org/0000-0002-6525-9895>

**Keywords:** hypoxia-inducible factor prolyl-hydroxylase inhibitors, erythropoiesis-stimulating agents, anemia, chronic kidney disease, dialysis

**Received:** January 16, 2023

**Accepted:** March 11, 2023

**Published:** March 27, 2023

**Copyright:** © 2023 Chen et al. This is an open access article distributed under the terms of the [Creative Commons Attribution License](https://creativecommons.org/licenses/by/3.0/) (CC BY 3.0), which permits unrestricted use, distribution, and reproduction in any medium, provided the original author and source are credited.

## ABSTRACT

**Background:** Five types of HIF-PHIs have been authorized for anemia treatment in CKD patients in China and Japan. These are enarodustat, roxadustat, daprodustat, vadadustat, and molidustat. How effectively they compare to ESAs about clinical results in CKD-DD patients is uncertain. This study examined the RCT evidence about the benefits and risks of HIF-PHIs and ESAs in dialysis CKD patients.

**Methods:** We conducted an extensive investigation and network meta-analysis of RCTs. In these RCTs, patients with CKD-DD received one of five different HIF-PHI or ESAs, a placebo, and no medical intervention. Outcomes included hemoglobin, iron parameters, and adverse events, and there were four weeks of follow-up at least. A frequentist framework for multivariate random effects meta-analyzed the results. The effect sizes of categorical variables were displayed as odds ratios. Mean differences were employed for computing continuous outcomes with common units; otherwise, standardized mean differences were applied. The Cochrane tool evaluated the bias risk in RCTs.

**Results:** 26 RCTs with 14945 patients were qualified for inclusion. Compared to the placebo, HIF-PHIs and ESAs dramatically boosted hemoglobin without affecting serum iron. Roxadustat performed better hemoglobin levels than ESAs (MD 0.32, 95% CI 0.10 to 0.53) and daprodustat (0.46, 0.09 to 0.84). Roxadustat (91.8%) was the top hemoglobin treatment among all medical interventions, as determined by the SUCRA ranking. However, roxadustat caused more thrombosis and hypertension than ESAs (1.61, 1.22 to 2.12) and vadadustat (1.36, 1.01 to 1.82). The lowest rates of hypertension and thrombosis were seen in molidustat (80.7%) and ESAs (88.5%). Compared with a placebo, ESAs and HIF-PHIs all affected TSAT levels. Except for molidustat, the other four HIF-PHIs impact different iron parameters. Regarding ferritin reduction, roxadustat (90.9%) and daprodustat (60.9%) came out on top. Enarodustat (80.9%) and roxadustat (74%) placed best and second in lowering hepcidin levels. The former two medicines for TIBC improvement were vadadustat (98.7%) and enarodustat (80.9%).

**Conclusion:** The most effective treatment for hemoglobin correction is roxadustat. The superior efficacy of reducing hepcidin makes roxadustat and enarodustat appropriate for patients with inflammation. However, the increased risk of hypertension and thrombosis associated with roxadustat should be noted. In patients at risk for hypertension and thrombosis, molidustat and ESAs may be preferable options. When administering roxadustat and daprodustat, clinicians should check ferritin to assess iron storage. Lower TSAT in patients receiving HIF-PHIs and ESAs treatment suggests intravenous iron supplements are needed.

## INTRODUCTION

Renal anemia is a prevalent and serious complication among CKD patients. It is common in many nations and linked to poor clinical outcomes, including hospitalization, declining health-related quality of life, and mortality [1, 2]. Anemia was defined as a hemoglobin level less than 130 g/L for males or 120 g/L for females over 15 years old in the clinical practice guideline of KDIGO in 2012 [3]. Renal anemia is caused by reduced red blood cell (RBC) survival and erythropoietin (EPO) production due to renal failure [4–7]. Furthermore, iron availability is necessary for erythropoiesis. Hcpidin and ferroportin contribute to the iron balance in humans. Elevated hcpidin and decreased ferroportin result in an iron shortage and sequestration, essential for renal anemia [8].

RBC transfusions and medicinal treatments, such as ESAs and HIF-PHIs, treat renal anemia in CKD patients. ESAs encourage erythropoiesis and lessen the requirement for RBC transfusions. KDIGO suggested that ESAs should treat CKD-DD patients with 9–10 g/dL to prevent a hemoglobin level of less than nine g/dL [1, 9]. However, ESAs are administrated subcutaneously or intravenously. In the long term, they most likely raise the risk of thrombosis and hypertension [10, 11]. Moreover, some patients are resistant and hypo-response to ESAs [12, 13]. Several factors are related to this hypo-responsiveness, including inflammation, nutritional state, and dialysis adequacy. Some people require a larger dose than usual to obtain the desired hemoglobin concentration. A higher dose of ESAs increases morbidity and death invariably [14, 15].

Unlike ESAs, HIF-PHIs are oral medications. They inhibit PHI to enhance HIF-mediated endogenous EPO synthesis. Furthermore, HIF-PHIs decrease hcpidin levels to improve iron availability. In 2020, the Asian Pacific Society of Nephrology (APSN) indicated that HIF-PHIs might be used as an alternative to ESAs in the correction and maintenance of hemoglobin for CKD patients receiving dialysis or not [16]. Nowadays, five kinds of HIF-PHIs have been approved in China and Japan for anemia treatment in CKD patients [17–21]. They are roxadustat, daprodustat, vadadustat, molidustat, and enarodustat. However, there is a lack of information regarding the relative advantages of HIF-PHIs and ESAs in CKD-DD patients in clinical guidelines and reported trials. The APSN questions their blood pressure and thrombosis safety. These unknowns create uncertainty in selecting an agent from among the five ESAs and HIF-PHIs.

The vast majority of reported meta-analyses compared roxadustat and daprodustat to a placebo. Only one network meta-analysis examined the distinction between HIF-PHIs and ESAs or placebo in CKD-NDD patients [22]. Due to a difference in iron influence among five HIF-PHIs and ESAs and clearance rate of HIF-PHIs between CKD-DD and CKD-NDD patients, we conducted this network meta-analysis to compare the clinical efficacy and safety of ESAs and five HIF-PHIs in patients with CKD-DD.

## METHODS

We registered the study protocol at the International Prospective Register of Systematic Reviews (CRD42022313670). We conducted the study according to the Preferred Reporting Items for Systematic Reviews and Meta-Analyses (PRISMA) guidelines.

### Eligibility criteria

Trials were eligible for inclusion if they (i) were RCTs; (ii) included participants over the age of 18 years with CKD-DD; (iii) compared five kinds of HIF-PHIs with placebo, ESAs, or no medical interventions; (iv) reported any of the following outcomes: differences in hemoglobin levels; differences in iron parameters (ferritin, hcpidin, TIBC, TSAT, serum iron); adverse cardiovascular events (hypertension, thrombosis). Studies covering pediatric patients and patients with CKD-NDD were excluded.

HIF-PHIs therapy in eligible RCTs included roxadustat, daprodustat, vadadustat, molidustat, and enarodustat. ESAs covered epoetin and darbepoetin. If a study contained two or more groups of the same experimental intervention, we combined data from these groups.

### Data sources and searches

Two independent blind reviewers (MZW and CJ) searched PubMed, Embase, Cochrane, Web of Science, and <https://clinicaltrials.gov> databases from inception to July 7, 2022. A third reviewer (JL) resolved disagreements. The search terms were roxadustat, daprodustat, molidustat, vadadusta, enarodustat, epoetin, darbepoetin, erythropoiesis-stimulating agent, chronic kidney disease, and dialysis. Additional studies were searched in the reference lists and relevant systematic reviews and meta-analyses.

### Data extraction

Two reviewers (CJ and XYY) independently evaluated the eligibility of titles, abstracts, and full texts. Two reviewers (LSM and CPP) independently extracted

data from eligible studies. Data included study characteristics (author, publication year), population (sample size, patient demographics, comorbidities), intervention description (drug name, dose), and outcomes. Reviewers resolved disagreements by discussion or consultation with a third reviewer (ZCY).

The primary outcome was hemoglobin change from baseline to end-up. Secondary outcomes were changes in ferritin, hepcidin, TIBC, TSAT, serum iron, and cardiovascular adverse events from baseline to end-up. Cardiovascular adverse events were hypertension and thrombosis.

### **Risk of bias assessment**

The Cochrane tool independently assessed the bias risk of eligible RCTs by three reviewers (CJ, MZW, and YXL). This tool included six items: random sequence generation, allocation concealment, blinding, incomplete outcome data, selective reporting, and any other bias. In evaluating every study, investigators judged the low, unclear, or high risk of bias for each item and assigned an overall risk of bias.

### **Data analysis**

For continuous outcomes, outcomes with the same unit were calculated as mean differences (MD) with 95% CI. Standardized mean differences (SMD) with 95% CI were calculated when continuous outcomes varied in measurement units. The results were synthesized as odds ratios (OR) with 95% CI for dichotomous outcomes.

We developed a network meta-analysis by a frequentist method. This method restricts maximum likelihood estimation to quantify network heterogeneity and account for the correlations between effect sizes in studies with more than two groups. Network consistency and common heterogeneity across all treatment contrasts were analyzed. We presented a summary effect of all comparisons by forest plots. Mean ranking and Surface Under the Cumulative Ranking curve (SUCRA) were computed to obtain treatment hierarchies. SUCRA determines the probability of a treatment being the most effective. The larger surface area under the curve presents a higher probability of a treatment being the better intervention. We estimated the inconsistency of direct and indirect evidence by global inconsistency and node-splitting methods.  $P < 0.05$  indicated significant heterogeneity in the entire network. The statistical analysis software was STATA 15.0 (Stata Corporation, College Station, TX, USA) with “network” packages.

### **Availability of data and materials**

Raw data can be accessed in the Supplementary Materials.

## **RESULTS**

### **Characteristics of included studies**

Twenty-six RCTs involving 14945 participants met our inclusion criteria (Figure 1). Table 1 and Supplementary Table 1 show the characteristics of included studies. The trial sample size ranged from 37 to 3554, and the mean age of patients ranged from 48 to 66 years. The length of their intervention ranged from 4 to 148 weeks. 44.42% ( $n = 6639$ ) were women. Of the 26 studies in the network analysis, 7 RCTs enrolled 998 patients undergoing peritoneal dialysis, and the remaining patients were undergoing hemodialysis. This network analysis evaluated five kinds of HIF-PHIs (roxadustat, daprodustat, vadadustat, molidustat, and enarodustat) and two kinds of ESAs (epoetin and darbepoetin). It contained the following comparisons: HIF-PHIs vs. placebo/control ( $n = 7$ ), HIF-PHIs vs. epoetin ( $n = 9$ ), HIF-PHIs vs. darbepoetin ( $n = 6$ ), HIF-PHIs vs. ESAs (epoetin and darbepoetin) ( $n = 4$ ).

### **Risk of bias**

According to the Cochrane Collaboration tool, most studies showed a low risk of bias. Twelve studies reported a high risk of bias because they were not double-blinded (Supplementary Figure 1).

### **Network meta-analysis**

Figure 2 shows the network of all comparisons. These trials included epoetin ( $n = 9$ ), darbepoetin ( $n = 6$ ), ESAs ( $n = 4$ ), daprodustat ( $n = 7$ ), molidustat ( $n = 4$ ), vadadustat ( $n = 3$ ), roxadustat ( $n = 10$ ), enarodustat ( $n = 2$ ), and placebo/control ( $n = 7$ ).

### **Inconsistency analysis**

We used a node-splitting approach and a global inconsistency analysis to examine the consistency of all comparisons. The global inconsistency result shows no statistical inconsistency ( $P = 0.377$ ). The outcomes of the node-splitting method are shown in Supplementary Table 2. Both direct and indirect comparisons were consistent.

### **Changes in hemoglobin levels from baseline**

Twenty-six RCTs reported data on hemoglobin. Figure 3 shows the results of the network meta-analysis

for hemoglobin. Compared with a placebo, five HIF-PHIs and ESAs significantly increased hemoglobin. Roxadustat significantly increased hemoglobin more than ESAs (0.32, 0.10 to 0.53) and daprodustat (0.46, 0.09 to 0.84). The other four HIF-PHIs did not improve hemoglobin levels more effectively than ESAs. There was also no statistical difference among daprodustat, molidustat, vadadustat, and enarodustat.

Supplementary Table 3 presents ranking probabilities, ranking plots, mean ranks, and SUCRA values for all interventions. In hemoglobin levels, roxadustat was ranked as the best treatment with a SUCRA value of 91.8%. The second-best treatment was enarodustat (79.4%), and the third-best was ESAs (53.9%). The

intervention with the lowest SUCRA value was daprodustat (33.7%) (Figure 4).

### Changes in iron parameters from baseline

We analyzed the influence of HIF-PHIs and ESAs on iron parameters, including ferritin, hepcidin, TIBC, TSAT, and serum iron. In all intervention comparisons, serum iron changes weren't statistically significant. Compared with the placebo, ESAs and five HIF-PHIs significantly reduced TSAT. For other iron parameters, ESAs and molidustat didn't affect. Vadadustat and enarodustat elevated TIBC (SMD 3.90, 95% CI 2.24 to 5.56; 2.35, 0.74 to 3.97) and decreased hepcidin (MD -38.79, 95% CI -68.95 to -8.63; -54.95, -91.21 to -18.69). Daprodustat increased TIBC (SMD 1.24, 95%

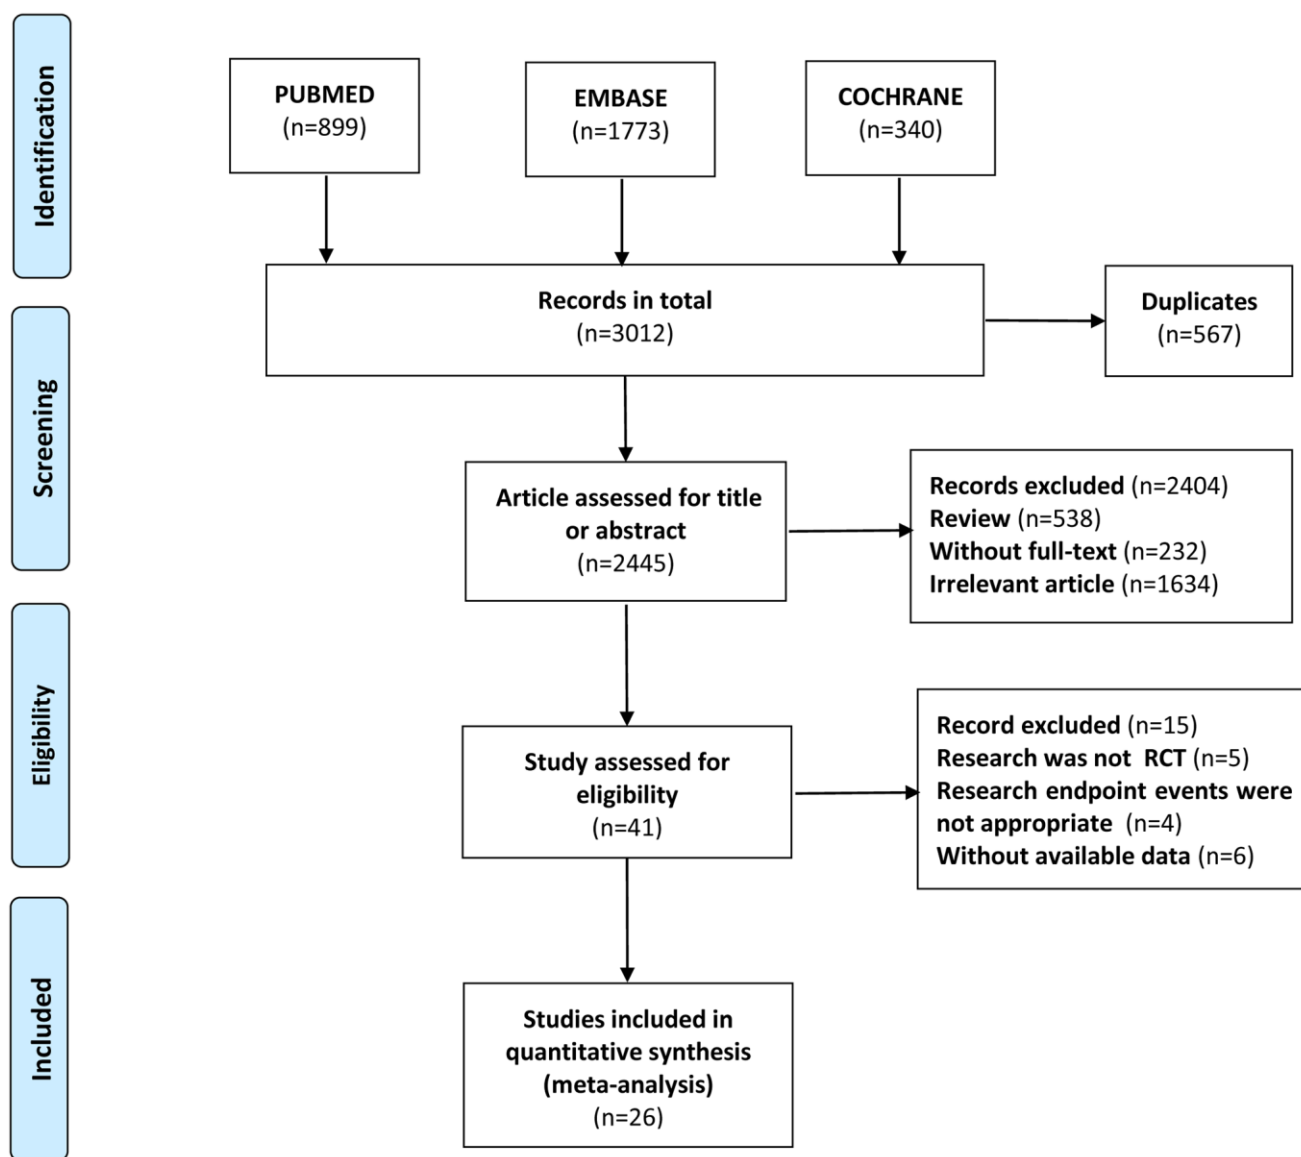

**Figure 1. Flowchart of the study.** The study followed the Preferred Reporting Items for Systematic Reviews and Meta-Analyses (PRISMA) guidelines.

**Table 1. Characteristics of the include studies.**

| Author /year                                       | Size         | Follow-up            | Age        | Study type | Interventions (no.)                                                                                                       | Comparisons                                       | Outcomes                                                                                              | Measures                                           | Risk of bias           |
|----------------------------------------------------|--------------|----------------------|------------|------------|---------------------------------------------------------------------------------------------------------------------------|---------------------------------------------------|-------------------------------------------------------------------------------------------------------|----------------------------------------------------|------------------------|
| Akizawa/2017 [40]<br>NCT02019719                   | 97           | 4 weeks              | 62y        | RCT        | Daprodustatt ( <i>n</i> = 78)<br>Placebo ( <i>n</i> = 19)                                                                 | Daprodustatt vs. Placebo                          | Hemoglobin level;<br>Hypertension<br>Iron parameters                                                  | Mean ± SD<br>Odds ratio                            | low risk               |
| Akizawa/2020 [41]<br>NCT02969655                   | 271          | 52 weeks             | 64y        | RCT        | Daprodustatt ( <i>n</i> = 136)<br>Darbepoetin Alfa ( <i>n</i> = 135)                                                      | Daprodustatt vs. Darbepoetin Alfa                 | Hemoglobin level;<br>Hypertension<br>Iron parameters                                                  | Mean ± SD<br>Odds ratio                            | low risk               |
| Bailey/2019 [42]<br>NCT02689206                    | 97           | 4 weeks              | 64y        | RCT        | Daprodustatt ( <i>n</i> = 79)<br>Placebo ( <i>n</i> = 18)                                                                 | Daprodustatt vs. Placebo                          | Hemoglobin level;<br>Hypertension<br>Thrombosis                                                       | Mean ± SD<br>Odds ratio                            | low risk               |
| Brigandi/2016 [43]<br>NCT01047397                  | 37           | 8 weeks              | 60y        | RCT        | Daprodustatt ( <i>n</i> = 31)<br>placebo ( <i>n</i> = 6)                                                                  | Daprodustatt vs. Placebo                          | Hemoglobin level                                                                                      | Mean ± SD                                          | high risk              |
| Holdstock/2016 [44]<br>NCT01587924                 | 82           | 4 weeks              | 58y        | RCT        | Daprodustatt ( <i>n</i> = 62)<br>rhEPO ( <i>n</i> = 20)                                                                   | Daprodustatt vs. rhEPO                            | Hemoglobin level;<br>Iron parameters                                                                  | Mean ± SD                                          | low risk               |
| Meadowcroft/2018 [45]<br>NCT01977482               | 210          | 24 weeks             | 60y        | RCT        | Daprodustatt ( <i>n</i> = 171)<br>Control ( <i>n</i> = 39)                                                                | Daprodustatt vs. Control                          | Hemoglobin level;<br>Hypertension<br>Iron parameters                                                  | Mean ± SD<br>Odds ratio                            | low risk               |
| Singh/2021 [46]<br>NCT02879305                     | 2964         | 148 weeks            | 58y        | RCT        | Daprodustatt ( <i>n</i> = 1487)<br>ESA ( <i>n</i> = 1477)                                                                 | Daprodustatt vs. ESA                              | Hemoglobin level;<br>Hypertension<br>Thrombosis; Iron parameters                                      | Mean ± SD<br>Odds ratio                            | high risk              |
| Akizawa/2020 [47]<br>NCT02952092                   | 301          | 24 weeks             | 65y        | RCT        | Roxadustat ( <i>n</i> = 150)<br>Darbepoetin alfa ( <i>n</i> = 151)                                                        | Roxadustat vs. Darbepoetin alfa                   | Hemoglobin level;<br>Iron parameters                                                                  | Mean ± SD                                          | low risk               |
| Barratt/2021 [48]<br>NCT02278341                   | 2796         | 36 weeks             | 56y        | RCT        | Roxadustat ( <i>n</i> = 1379)<br>ESA ( <i>n</i> = 1417)                                                                   | Roxadustat vs. ESA                                | Hemoglobin level                                                                                      | Mean ± SD                                          | high risk              |
| Chen/2017 [29]<br>NCT01596855                      | 96           | 8 weeks              | 62y        | RCT        | Roxadustat ( <i>n</i> = 74)<br>rhEPO ( <i>n</i> = 22)                                                                     | Roxadustat vs. rhEPO                              | Hemoglobin level;<br>Hypertension<br>Iron parameters                                                  | Mean ± SD<br>Odds ratio                            | high risk              |
| Chen/2019 [27]<br>NCT02652806                      | 304          | 27 weeks             | 49y        | RCT        | Roxadustat ( <i>n</i> = 204)<br>Epoetin alfa ( <i>n</i> = 100)                                                            | Roxadustat vs. Epoetin alfa                       | Hemoglobin level;<br>Hypertension<br>Iron parameters                                                  | Mean ± SD<br>Odds ratio                            | high risk              |
| Chen/2021 [49]                                     | 50           | 36 weeks             | 48y        | RCT        | Roxadustat ( <i>n</i> = 12)<br>EPO ( <i>n</i> = 38)                                                                       | Roxadustat vs. EPO                                | Hemoglobin level;<br>Iron parameters                                                                  | Mean ± SD                                          | high risk              |
| Csiky/2021 [50]<br>NCT02964936                     | 836          | 52 weeks             | 61y        | RCT        | Roxadustat ( <i>n</i> = 415)<br>ESA ( <i>n</i> = 421)                                                                     | Roxadustat vs. ESA                                | Hemoglobin level;<br>Hypertension<br>Thrombosis; Iron parameters                                      | Mean ± SD<br>Odds ratio                            | high risk              |
| Hou/2021 [51]                                      | 129          | 24 weeks             | 48y        | RCT        | Roxadustat ( <i>n</i> = 86)<br>ESAs ( <i>n</i> = 43)                                                                      | Roxadustat vs. ESAs                               | Hemoglobin level;<br>Hypertension<br>Iron parameters                                                  | Mean ± SD<br>Odds ratio                            | low risk               |
| Provenzano/2016 [30]<br>NCT02273726                | 90           | 19 weeks             | 57y        | RCT        | Roxadustat ( <i>n</i> = 67)<br>Epoetin alfa ( <i>n</i> = 23)                                                              | Roxadustat vs. Epoetin alfa                       | Hemoglobin level;<br>Iron parameters                                                                  | Mean ± SD                                          | high risk              |
| Provenzano/2021 [52]<br>NCT02052310<br>NCT02174731 | 1043<br>2019 | 52 weeks<br>52 weeks | 54y<br>54y | RCT<br>RCT | Roxadustat ( <i>n</i> = 522)<br>Epoetin alfa ( <i>n</i> = 521)<br>Roxadustat ( <i>n</i> = 1003)<br>EPO ( <i>n</i> = 1016) | Roxadustat vs. Epoetin alfa<br>Roxadustat vs. EPO | Hemoglobin level;<br>Hypertension<br>Thrombosis; Iron parameters<br>Hemoglobin level;<br>Hypertension | Mean ± SD<br>Odds ratio<br>Mean ± SD<br>Odds ratio | high risk<br>high risk |
| Akizawa/2019 [53]                                  | 74           | 17 weeks             | 60y        | RCT        | Molidustat ( <i>n</i> = 59)<br>Control ( <i>n</i> = 15)                                                                   | Molidustat vs. Control                            | Hemoglobin level                                                                                      | Mean ± SD                                          | high risk              |

|                                      |      |           |     |     |                                                     |                                   |                                                                     |                         |              |
|--------------------------------------|------|-----------|-----|-----|-----------------------------------------------------|-----------------------------------|---------------------------------------------------------------------|-------------------------|--------------|
| Akizawa/2019 [54]<br>NCT02064426     | 87   | 52 weeks  | 60y | RCT | Molidustat (n = 57)<br>Epoetin (n = 30)             | Molidustat vs.<br>Epoetin         | Hemoglobin level;<br>Hypertension<br>Thrombosis; Iron<br>parameters | Mean ± SD<br>Odds ratio | high<br>risk |
| Akizawa/2021 [55]<br>NCT03543657     | 229  | 52 weeks  | 66y | RCT | Molidustat (n = 153)<br>Darbeoetin (n = 76)         | Molidustat vs.<br>Darbeoetin      | Hemoglobin level;<br>Hypertension<br>Iron parameters                | Mean ± SD<br>Odds ratio | low<br>risk  |
| Macdougall/2018 [56]<br>NCT01975818b | 199  | 16 weeks  | 59y | RCT | Molidustat (n = 157)<br>Epoetin (n = 42)            | Molidustat vs.<br>Epoetin         | Hemoglobin level;<br>Hypertension<br>Iron parameters                | Mean ± SD<br>Odds ratio | low<br>risk  |
| Akizawa/2019 [57]                    | 82   | 24 weeks  | 62y | RCT | Enarodustat (n = 60)<br>Placebo (n = 22)            | Enarodusta vs.<br>Placebo         | Hemoglobin level;<br>Iron parameters                                | Mean ± SD               | low<br>risk  |
| Akizawa/2021 [58]                    | 172  | 24 weeks  | 64y | RCT | Enarodustat (n = 86)<br>Darbeoetin alfa (n = 86)    | Enarodusta vs.<br>Darbeoetin alfa | Hemoglobin level;<br>Hypertension<br>Thrombosis; Iron<br>parameters | Mean ± SD<br>Odds ratio | low<br>risk  |
| Eckardt/2021 [59]<br>NCT02892149     | 3554 | 116 weeks | 58y | RCT | Vadadustat (n = 1777)<br>Darbeoetin alfa (n = 1777) | Vadadustat vs.<br>Darbeoetin alfa | Hemoglobin level;<br>Hypertension<br>Thrombosis                     | Mean ± SD<br>Odds ratio | high<br>risk |
| Nangaku/2020 [60]<br>NCT03054350     | 58   | 18 weeks  | 64y | RCT | Vadadustat (n = 44)<br>Placebo (n = 14)             | Vadadusta vs.<br>Placebo          | Hemoglobin level;<br>Iron parameters                                | Mean ± SD               | low<br>risk  |
| Nangaku/2021 [61]<br>NCT03439137     | 323  | 52 weeks  | 65y | RCT | Vadadustat (n = 162)<br>Darbeoetin alfa (n = 161)   | Vadadustat vs.<br>Darbeoetin alfa | Hemoglobin level;<br>Hypertension<br>Thrombosis; Iron<br>parameters | Mean ± SD<br>Odds ratio | low<br>risk  |

Abbreviations: RCT: randomized controlled trial; SD: standard deviation; ESA: erythropoiesis-stimulating agent; EPO: erythropoietin.

CI 0.17 to 2.31) and reduced ferritin (MD  $-97.72$ , 95% CI  $-187.72$  to  $-7.71$ ) as well as hepcidin (MD  $-46.02$ , 95% CI  $-75.64$  to  $-16.41$ ). Roxadustat reduced ferritin (MD  $-145.68$ , 95% CI  $-256.90$  to  $-34.47$ ) and hepcidin (MD  $-47.73$ , 95% CI  $-82.78$  to  $-12.68$ ). In conclusion, TSAT concentrations were reduced by HIF-PHIs and

ESAs. Roxadustat and daprodustat decreased ferritin. Four drugs reduced hepcidin: daprodustat, vadadustat, roxadustat, and enarodustat. Vadadustat, daprodustat, and enarodustat all had significantly higher TIBC levels. Comparing these four HIF-PHIs, ferritin, hepcidin, TSAT, and serum iron levels weren't

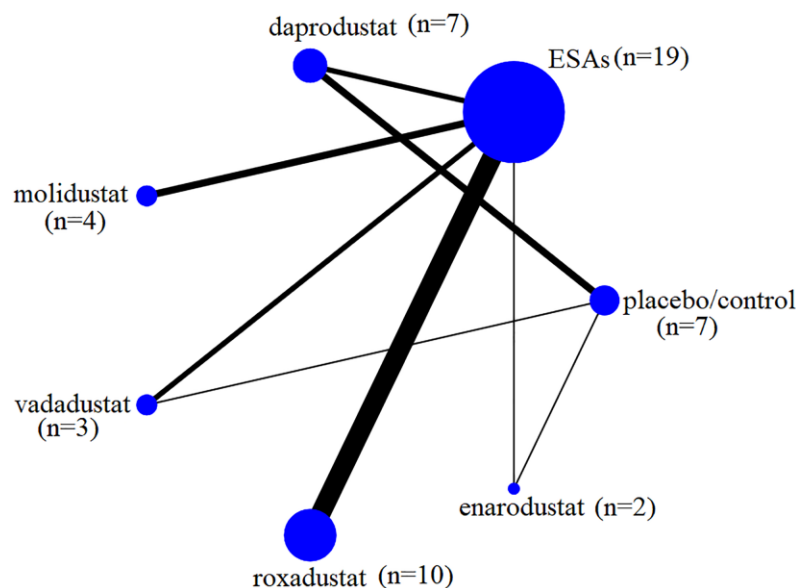

**Figure 2. Network of the study treatments.** Nodes represent intervention comparisons. The size of the nodes is proportional to participant numbers. The width of the lines was in direct ratio to the number of trials.

significantly changed. Vadadustat increased TIBC much more than daprodustat (SMD 2.66, 95% CI 0.94 to 4.38) (Supplementary Figures 2–6).

SUCRA ranked all groups in the influence on the iron parameters (Supplementary Figures 7–11 and Supplementary Table 3). Roxadustat was ranked first in decreasing ferritin and second in reducing hepcidin, with SUCRA values of 90.9% and 74%. Enarodustat was ranked first in the reduction of hepcidin (80.9%) and TSAT (88.7%). Vadadustat performed the best effect on increased TIBC (98.7%).

### Hypertension and thrombosis

A lower incidence of hypertension was observed in vadadustat than in roxadustat (1.36, 1.01 to 1.82) and ESAs (0.74, 0.60 to 0.91). Daprodustat (2.52, 1.28 to 4.94) and roxadustat (1.61, 1.22 to 2.12) induced higher thrombosis than ESAs (Supplementary Figures 12 and 13). From the SUCRA value, we found that the top two drugs with the lowest risk of hypertension were

molidustat (80.7%) and vadadustat (76.5%). ESAs (88.5%) and enarodustat (67.9%) ranked first two positions, respectively, in the safety of thrombosis (Supplementary Figures 14 and 15).

### Small-study effect analysis

We found no evidence of small study effects across outcomes (Figure 5, Supplementary Figures 16–22).

## DISCUSSION

### Principal findings

This systematic review and network meta-analysis demonstrated the impact of ESAs and HIF-PHIs on clinical outcomes in patients with CKD-DD. Roxadustat performed significantly more than ESAs and daprodustat and ranked first in hemoglobin improvement. According to the SUCRA ranking, roxadustat and daprodustat were the most effective medications for reducing ferritin. For lowering hepcidin levels, enarodustat and roxadustat

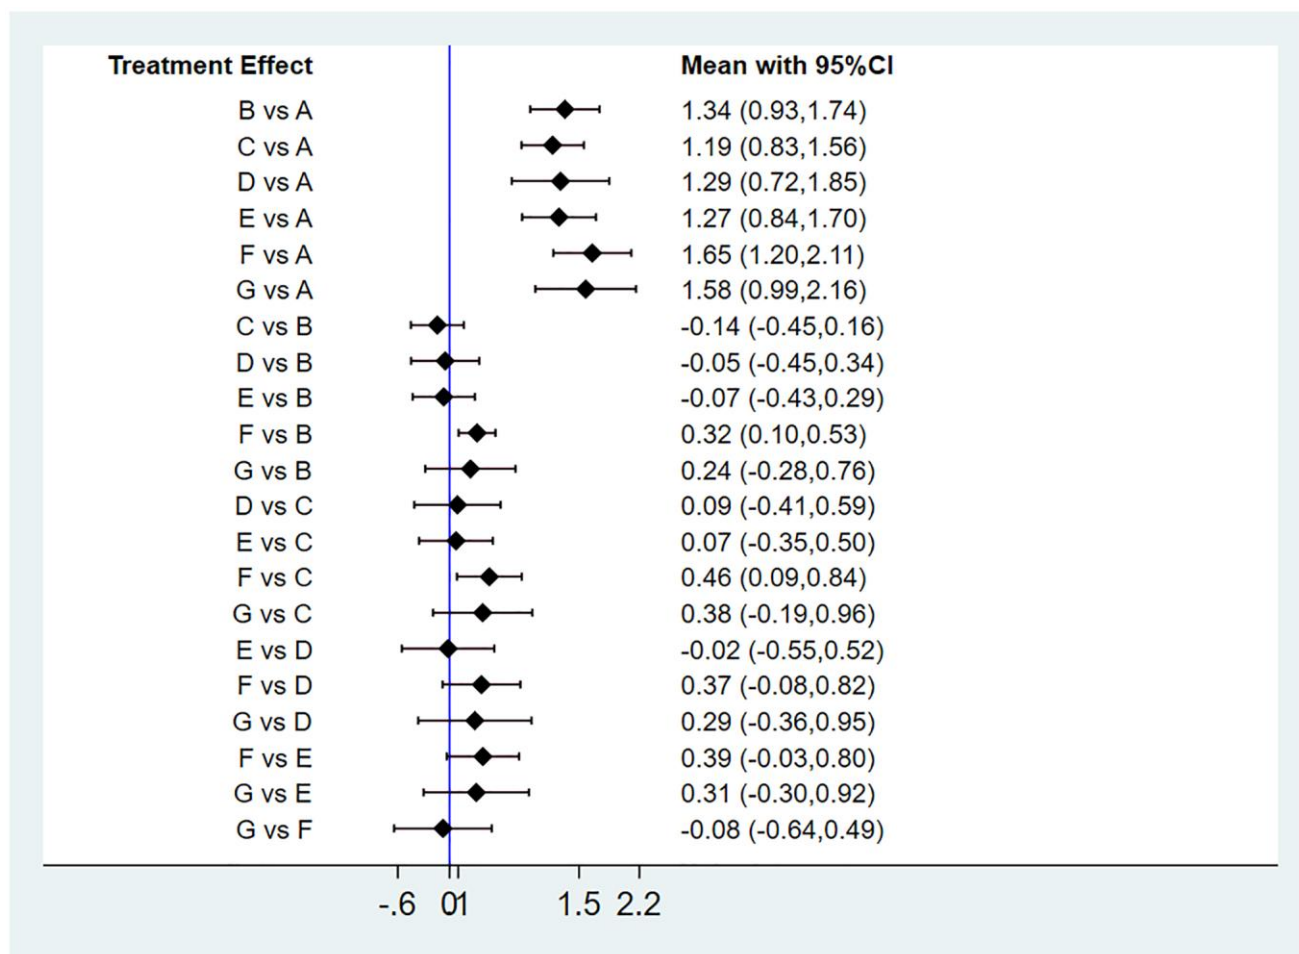

**Figure 3. Forest plot of hemoglobin levels.** Abbreviations: A: placebo/control; B: ESAs; C: daprodustat; D: molidustat; E: vadadustat; F: roxadustat; G: enarodustat.

came in first and second, respectively. The previous two medications for the improvement of TIBC were vadadustat and enarodustat. Enarodustat and ESAs had the lowest TSAT of all the drugs. Daprodustat and roxadustat lead to higher thrombosis events than ESAs. Molidustat and ESAs were the safest drugs with the lowest hypertension and thrombosis risk.

### Comparison with other studies

This study provided sufficient evidence supporting the efficacy of five HIF-PHIs in hemoglobin improvement in CKD-DD patients. Roxadustat performed better efficacy in elevating hemoglobin levels than ESAs in CKD-DD patients. This result is consistent with previous meta-analyses [23–25]. One meta-analysis investigated roxadustat on hemoglobin in six studies [26–31]. It presented that in CKD-DD patients, hemoglobin levels increased in roxadustat (0.52, 0.38 to 0.66) compared to EPO. The other meta-analysis included ten RCTs with 3031 patients in the roxadustat group and 2737 in the ESAs group. It demonstrated that roxadustat was associated with increased hemoglobin

levels (0.2, 0.02 to 0.39,  $P = 0.03$ ) compared with the ESAs group. A meta-analysis investigated daprodustat in CKD-DD patients [32]. It reported that hemoglobin change was significantly higher in the daprodustat group than that in the placebo (1.88, 0.68 to 3.09,  $P = 0.002$ ). There was no significant difference between daprodustat and EPO (0.12, -0.28 to 0.52,  $P = 0.55$ ). This study supports this finding. Moreover, this study discovered that roxadustat is much more effective in hemoglobin improvement than daprodustat in CKD-DD patients. Although roxadustat ranked the best medical intervention in hemoglobin, its higher risk of hypertension and thrombosis can't be ignored [33, 34]. Higher hemoglobin level is a risk factor for thrombosis. The increase in hemoglobin will raise blood viscosity, slow blood flow, and possibly result in thrombosis. High hemoglobin may be hyperplastic cell disease, which may cause platelet rise and thrombosis. The APSN reported an association between iron deficiency and thrombosis events. Iron supplements probably reduce the roxadustat-related thrombosis risk. Molidustat and ESAs are appropriate drugs for patients with hypertension and thrombosis risk.

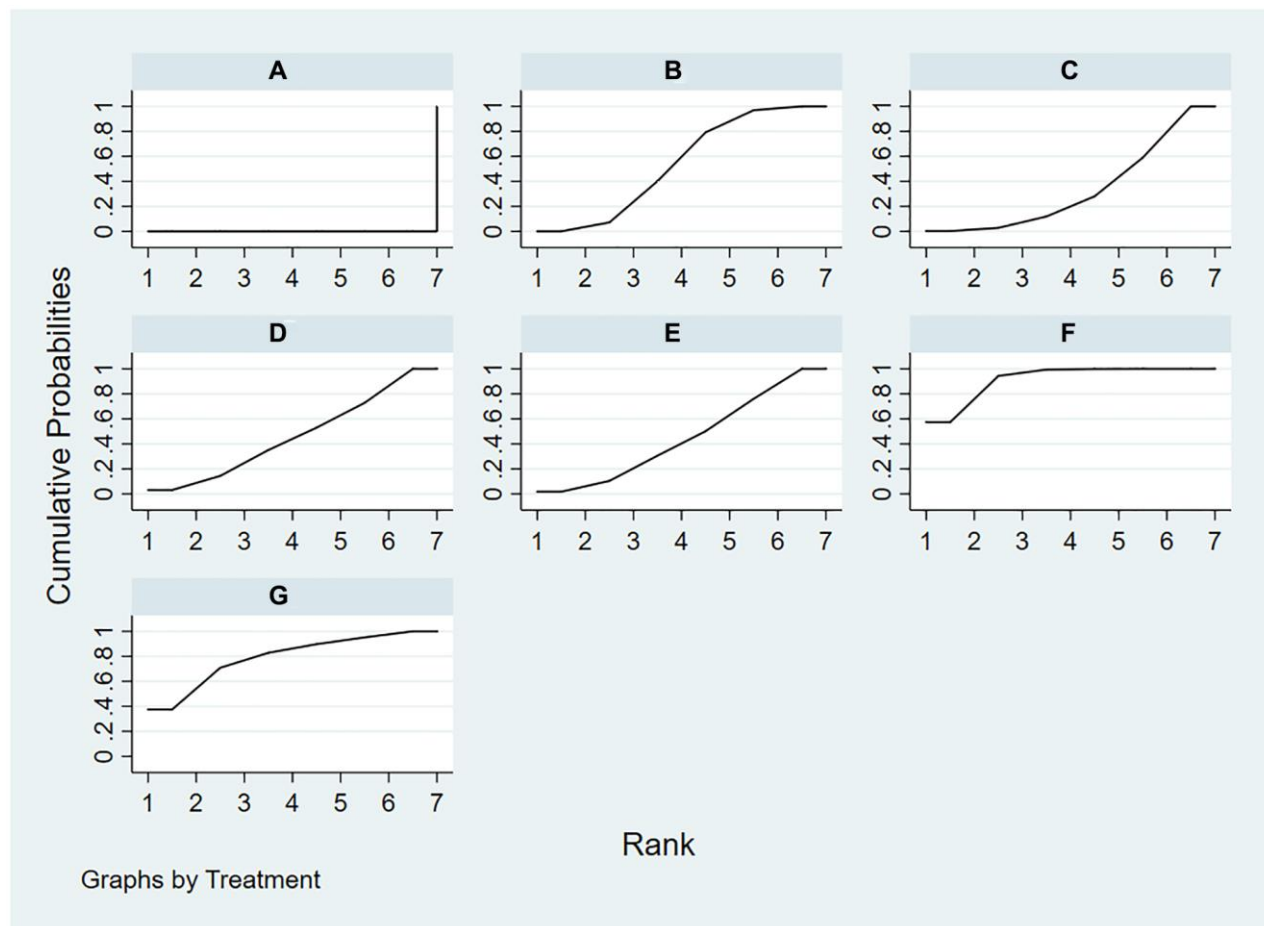

**Figure 4. The surface under the cumulative ranking curve for hemoglobin.** (A) placebo/control; (B) ESAs; (C) daprodustat; (D) molidustat; (E) vadadustat; (F) roxadustat; (G) enarodustat.



There is no meta-analysis about the efficacy and risk of vadadustat, molidustat, and enarodustat in patients with CKD-DD. This study first demonstrated the benefit of vadadustat, molidustat, and enarodustat on clinical outcomes. However, these three HIF-PHIs presented comparable hemoglobin improvement to ESAs. The top two drugs with the lowest rate of hypertension were molidustat and vadadustat, and thrombosis was ESAs and enarodustat. These results provide clinicians with evidence to select appropriate medicine considering the benefits and risks for CKD-DD patients.

Previous studies did not examine the effect of five HIF-PHIs on iron parameters in CKD-DD patients. This research investigated the impact of five HIF-PHIs on iron parameters. As an iron-regulating protein, hepcidin is essential in iron balance. Ferroportin is the only known exporter of iron from mammalian cells. Hepcidin degrades ferroportin to inhibit the release of stored iron from reticuloendothelial cells. Therefore, hepcidin-mediated iron depletion limits erythropoiesis

[35–37]. Patients with CKD-DD experience an increase in hepcidin, particularly during inflammation. Higher hepcidin levels correlate with lower hemoglobin levels and a greater likelihood of anemia [38, 39]. Except for molidustat, HIF-PHIs in this study reduce hepcidin. ESAs do not participate in the regulation of hepcidin. Therefore, this study suggested that HIF-PHIs, except for molidustat, could replace ESAs in treating CKD-DD patients with inflammation or high hepcidin levels. Enarodustat and roxadustat were the two HIF-PHIs most effective at lowering hepcidin.

Daprodustat and roxadustat both showed reduced ferritin levels. As a form of iron storage in the liver, ferritin monitoring is important in daprodustat and roxadustat administration. Clinicians can evaluate the necessity of the iron supplement by ferritin examination. Besides ferritin, TSAT and serum iron are the most common biomarkers of stored iron. In patients with functional iron deficiency on ESA therapy, enteral iron absorption or release from reticuloendothelial cells is insufficient to meet erythropoiesis demands. These

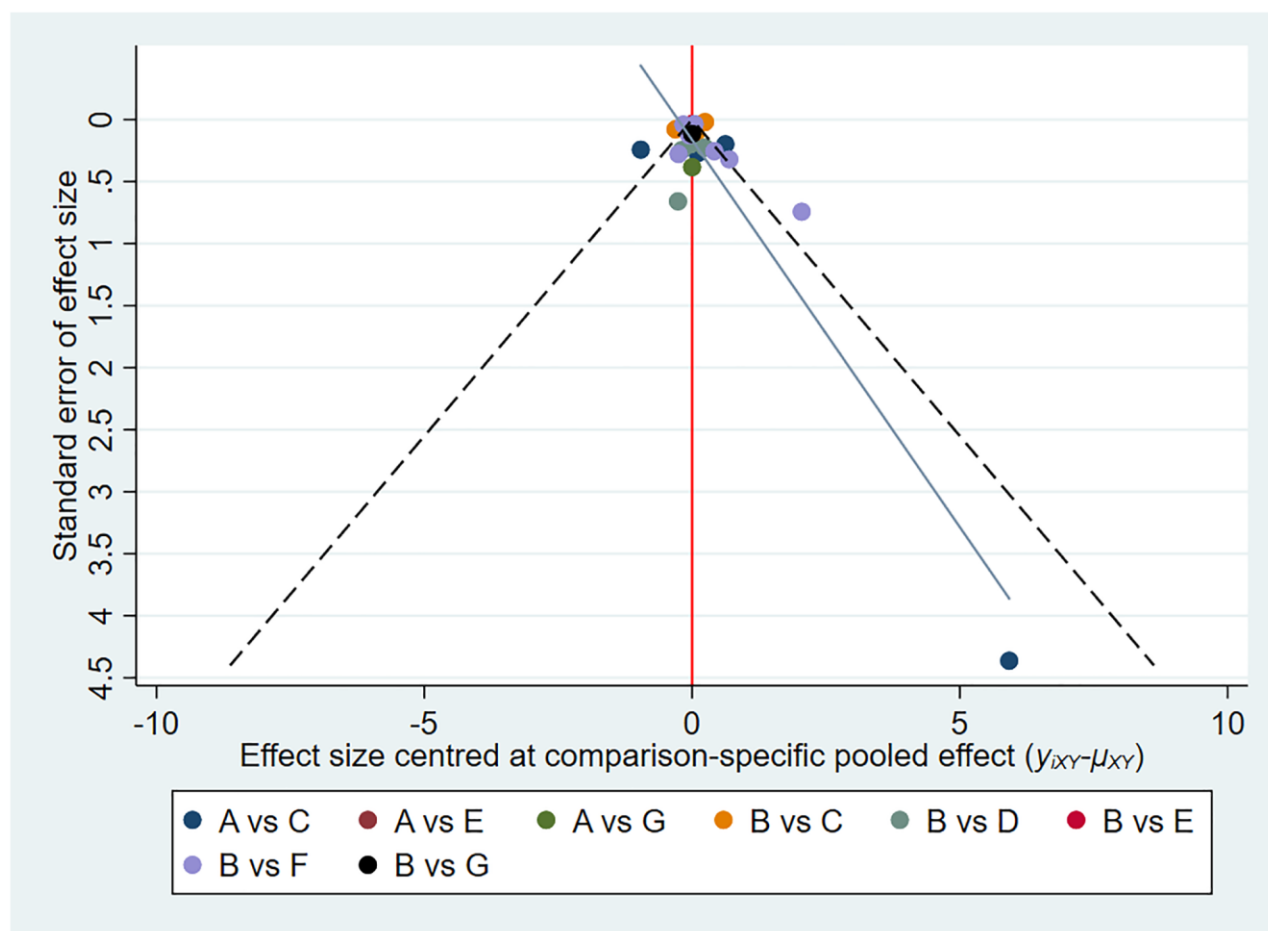

**Figure 5. Funnel plots assessing hemoglobin levels.** The red line represents the null hypothesis. The yellow/blue line represents the regression line. Different colours correspond to different comparisons. Abbreviations: A: placebo/control; B: ESAs; C: daprodustat; D: molidustat; E: vadadustat; F: roxadustat; G: enarodustat.

patients frequently exhibit low TSAT results and may benefit from IV iron treatment. In all HIF-PHIs and ESAs, the effectiveness of lowering TSAT was observed in this study. We should focus on the TSAT levels to determine whether patients with functional iron deficiency need IV iron supplements. Consistent with a report [16], HIF-PHIs and ESAs showed no significant change in serum iron. This evidence indicates that only serum iron measure is insufficient to evaluate patients' iron condition.

A previous network meta-analysis reported no difference in hemoglobin improvement between roxadustat and ESAs in CKD-NDD patients [22]. It is contrary to this study. This inconsistency may indicate higher hemoglobin improved by roxadustat in patients with CKD-DD than in CKD-NDD. This hypothesis achieves support from the other analysis [33]. It conducted a subgroup analysis on hemoglobin levels to compare CKD-DD patients with NDD patients. The result presented that HIF-PHIs induced higher hemoglobin than ESAs in CKD-DD patients (0.16, 0.05 to 0.27). However, HIF-PHIs weren't significantly different from ESAs in CKD-NDD patients (-0.02, -0.26 to 0.22). This distinction between the two kinds of populations probably results from disease conditions and excretory capacity. The kidney eliminates approximately 40% of roxadustat, and roxadustat cannot be removed by dialysis. The majority of CKD-DD patients have little to no kidney function left. As a result, the roxadustat excretion rate in CKD-DD patients may be much slower than in CKD-NDD patients. However, ESA pharmacokinetics in CKD-DD patients are comparable to those in CKD-NDD patients. In CKD-DD patients, higher roxadustat concentrations probably result in better efficacy.

## CONCLUSIONS

We anticipate this study's findings to provide implications for drug selection in renal anemia of CKD-DD patients. In treating patients with ESAs-resistant, clinicians can prescribe roxadustat to improve hemoglobin. CKD patients with inflammation and high hepcidin levels can benefit from enarodustat and roxadustat. Clinicians need to be aware of thrombosis and hypertension when prescribing roxadustat. Molidustat is a relatively safe medication for patients with hypertension. Regarding lowering thrombosis risk, ESAs are better than other therapies. Ferritin and TSAT are biomarkers for iron storage. Ferritin levels should be monitored while taking roxadustat and daprodustat. Reduced TSAT indicates that IV iron therapy is required for patients with HIF-PHIs and ESA administration.

## Limitations of this study

This study exits some limitations. First, the results of this study come from CKD-DD participants. It is not suitable for CKD-NDD patients' applications. Second, whether iron supplements should be prescribed in CKD-DD patients during HIF-PHIs intervention is unknown.

## Abbreviations

ESAs: Erythropoiesis-stimulating agents; HIF-PHIs: hypoxia-inducible factor prolyl hydroxylase inhibitors; CKD: chronic kidney disease; DD: dialysis-dependent; NDD: non-dialysis dependent; RCTs: randomized controlled trials; TSAT: transferrin saturation; TIBC: total iron-binding capacity; EPO: epoetin; DPO: darbepoetin; KDOQI: Kidney Foundation–Kidney Disease Outcomes Quality Initiative; APSN: Asian Pacific Society of Nephrology; PRISMA: Preferred Reporting Items for Systematic Reviews and Meta-Analyses; MD: mean difference; SMD: standardized mean difference; OR: odds ratios; 95% CI: 95% confidence intervals; SUCRA: Surface Under the Cumulative Ranking curve; RBC: red blood cell.

## AUTHOR CONTRIBUTIONS

M.Z.W and C.P.P conducted the protocol of this study; M.Z.W, C.J, and J.L searched related trails. C.P.P, X.Y.Y, C.J, Z.C.Y, and L.S.M screened inclusion RCTs and extracted data; M.Z.W, Y.X.L, and C.J analyzed risk bias; M.Z.W and C.P.P analyzed data and drafted manuscript writing; C.J and S.X.Y revised the manuscript.

## CONFLICTS OF INTEREST

The authors declare no conflicts of interest related to this study.

## FUNDING

Funds supporting this work are from the Wu Jieping Medical Foundation (grant numbers 320.6750.2020-04-44), the Research and Development Project of Zhejiang "top soldiers" and "leading geese" (grant numbers 2022C03172), Zhejiang Health Science and Technology Plan Project (grant numbers 2022RC091), and the General Research Project of the Education Department of Zhejiang Province (grant numbers Y202248708).

## Editorial note

&This corresponding author has a verified history of publications using a personal email address for correspondence.

## REFERENCES

1. Atkinson MA, Warady BA. Anemia in chronic kidney disease. *Pediatr Nephrol*. 2018; 33:227–38. <https://doi.org/10.1007/s00467-017-3663-y> PMID:28412770
2. Coresh J, Selvin E, Stevens LA, Manzi J, Kusek JW, Eggers P, Van Lente F, Levey AS. Prevalence of chronic kidney disease in the United States. *JAMA*. 2007; 298:2038–47. <https://doi.org/10.1001/jama.298.17.2038> PMID:17986697
3. McMurray JJV, Parfrey PS, Adamson JW, Aljama P, Berns JS, Bohlius J, Drüeke TB, Finkelstein FO, Fishbane S, Ganz T, Macdougall I, McDonald RA, McMahon L, et al. Kidney disease: Improving Global Outcomes (KDIGO) Anemia Work Group. KDIGO clinical practice guideline for anemia in chronic kidney disease. *Kidney Int Suppl*. 2012; 2:279–335. <https://doi.org/10.1038/kisup.2012.37>
4. Babitt JL, Lin HY. Mechanisms of anemia in CKD. *J Am Soc Nephrol*. 2012; 23:1631–4. <https://doi.org/10.1681/ASN.2011111078> PMID:22935483
5. National Clinical Guideline Centre. Anaemia management in chronic kidney disease: update 2015 NICE guideline 8. National Institute for Health and Care Excellence (NICE). 2019. <https://www.nice.org.uk/guidance/ng8>.
6. Stauffer ME, Fan T. Prevalence of anemia in chronic kidney disease in the United States. *PLoS One*. 2014; 9:e84943. <https://doi.org/10.1371/journal.pone.0084943> PMID:24392162
7. Kile M, Sudchada P. Current treatment practices for anemia in patients with chronic kidney disease and future opportunities with hypoxia-inducible factor prolyl hydroxylase inhibitors: a narrative review. *Int Urol Nephrol*. 2021; 53:283–90. <https://doi.org/10.1007/s11255-020-02584-x> PMID:32770437
8. Collister D, Rigatto C, Tangri N. Anemia management in chronic kidney disease and dialysis: a narrative review. *Curr Opin Nephrol Hypertens*. 2017; 26:214–8. <https://doi.org/10.1097/MNH.0000000000000317> PMID:28306566
9. Fukui K, Shinozaki Y, Kobayashi H, Deai K, Yoshiuchi H, Matsui T, Matsuo A, Matsushita M, Tanaka T, Nangaku M. JTZ-951 (enarodustat), a hypoxia-inducible factor prolyl hydroxylase inhibitor, stabilizes HIF- $\alpha$  protein and induces erythropoiesis without effects on the function of vascular endothelial growth factor. *Eur J Pharmacol*. 2019; 859:172532. <https://doi.org/10.1016/j.ejphar.2019.172532> PMID:31301309
10. Zhong H, Lin W, Zhou T. Current and Emerging Drugs in the Treatment of Anemia in Patients with Chronic Kidney Disease. *J Pharm Pharm Sci*. 2020; 23:278–88. <https://doi.org/10.18433/jpps30919> PMID:32762831
11. Locatelli F, Fishbane S, Block GA, Macdougall IC. Targeting Hypoxia-Inducible Factors for the Treatment of Anemia in Chronic Kidney Disease Patients. *Am J Nephrol*. 2017; 45:187–99. <https://doi.org/10.1159/000455166> PMID:28118622
12. Mikhail A, Brown C, Williams JA, Mathrani V, Shrivastava R, Evans J, Isaac H, Bhandari S. Renal association clinical practice guideline on Anaemia of Chronic Kidney Disease. *BMC Nephrol*. 2017; 18:345. <https://doi.org/10.1186/s12882-017-0688-1> PMID:29191165
13. Koury MJ, Haase VH. Anaemia in kidney disease: harnessing hypoxia responses for therapy. *Nat Rev Nephrol*. 2015; 11:394–410. <https://doi.org/10.1038/nrneph.2015.82> PMID:26055355
14. Bae MN, Kim SH, Kim YO, Jin DC, Song HC, Choi EJ, Kim YL, Kim YS, Kang SW, Kim NH, Yang CW, Kim YK. Association of Erythropoietin-Stimulating Agent Responsiveness with Mortality in Hemodialysis and Peritoneal Dialysis Patients. *PLoS One*. 2015; 10:e0143348. <https://doi.org/10.1371/journal.pone.0143348> PMID:26588085
15. Cizman B, Smith HT, Camejo RR, Casillas L, Dhillon H, Mu F, Wu E, Xie J, Zuckerman P, Coyne D. Clinical and Economic Outcomes of Erythropoiesis-Stimulating Agent Hyporesponsiveness in the Post-Bundling Era. *Kidney Med*. 2020; 2:589–99.e1. <https://doi.org/10.1016/j.xkme.2020.06.008> PMID:33089137
16. Yap DYH, McMahon LP, Hao CM, Hu N, Okada H, Suzuki Y, Kim SG, Lim SK, Vareesangthip K, Hung CC, Nangaku M, and APSN HIF-PHI Recommendation Committee. Recommendations by the Asian Pacific society of nephrology (APSN) on the appropriate use of HIF-PH inhibitors. *Nephrology (Carlton)*. 2021; 26:105–18. <https://doi.org/10.1111/nep.13835> PMID:33222343
17. Sanghani NS, Haase VH. Hypoxia-Inducible Factor

- Activators in Renal Anemia: Current Clinical Experience. *Adv Chronic Kidney Dis.* 2019; 26:253–66.  
<https://doi.org/10.1053/j.ackd.2019.04.004>  
PMID:[31477256](https://pubmed.ncbi.nlm.nih.gov/31477256/)
18. Dhillon S. Daprodustat: First Approval. *Drugs.* 2020; 80:1491–7.  
<https://doi.org/10.1007/s40265-020-01384-y>  
PMID:[32880805](https://pubmed.ncbi.nlm.nih.gov/32880805/)
19. Markham A. Vadadustat: First Approval. *Drugs.* 2020; 80:1365–71.  
<https://doi.org/10.1007/s40265-020-01383-z>  
PMID:[32852744](https://pubmed.ncbi.nlm.nih.gov/32852744/)
20. Markham A. Enarodustat: First Approval. *Drugs.* 2021; 81:169–74.  
<https://doi.org/10.1007/s40265-020-01444-3>  
PMID:[33320297](https://pubmed.ncbi.nlm.nih.gov/33320297/)
21. Gupta N, Wish JB. Hypoxia-Inducible Factor Prolyl Hydroxylase Inhibitors: A Potential New Treatment for Anemia in Patients With CKD. *Am J Kidney Dis.* 2017; 69:815–26.  
<https://doi.org/10.1053/j.ajkd.2016.12.011>  
PMID:[28242135](https://pubmed.ncbi.nlm.nih.gov/28242135/)
22. Zheng Q, Yang H, Sun L, Wei R, Fu X, Wang Y, Huang Y, Liu YN, Liu WJ. Efficacy and safety of HIF prolyl-hydroxylase inhibitor vs epoetin and darbepoetin for anemia in chronic kidney disease patients not undergoing dialysis: A network meta-analysis. *Pharmacol Res.* 2020; 159:105020.  
<https://doi.org/10.1016/j.phrs.2020.105020>  
PMID:[32561478](https://pubmed.ncbi.nlm.nih.gov/32561478/)
23. Liu J, Zhang A, Hayden JC, Bhagavathula AS, Alshehhi F, Rinaldi G, Kontogiannis V, Rahmani J. Roxadustat (FG-4592) treatment for anemia in dialysis-dependent (DD) and not dialysis-dependent (NDD) chronic kidney disease patients: A systematic review and meta-analysis. *Pharmacol Res.* 2020; 155:104747.  
<https://doi.org/10.1016/j.phrs.2020.104747>  
PMID:[32171893](https://pubmed.ncbi.nlm.nih.gov/32171893/)
24. Abdelazeem B, Shehata J, Abbas KS, El-Shahat NA, Malik B, Savarapu P, Eltobgy M, Kunadi A. The efficacy and safety of roxadustat for the treatment of anemia in non-dialysis dependent chronic kidney disease patients: An updated systematic review and meta-analysis of randomized clinical trials. *PLoS One.* 2022; 17:e0266243.  
<https://doi.org/10.1371/journal.pone.0266243>  
PMID:[35363823](https://pubmed.ncbi.nlm.nih.gov/35363823/)
25. Zheng L, Tian J, Liu D, Zhao Y, Fang X, Zhang Y, Liu Y. Efficacy and safety of roxadustat for anaemia in dialysis-dependent and non-dialysis-dependent chronic kidney disease patients: A systematic review and meta-analysis. *Br J Clin Pharmacol.* 2022; 88:919–32.  
<https://doi.org/10.1111/bcp.15055>  
PMID:[34428860](https://pubmed.ncbi.nlm.nih.gov/34428860/)
26. Chen N, Hao C, Peng X, Lin H, Yin A, Hao L, Tao Y, Liang X, Liu Z, Xing C, Chen J, Luo L, Zuo L, et al. Roxadustat for Anemia in Patients with Kidney Disease Not Receiving Dialysis. *N Engl J Med.* 2019; 381:1001–10.  
<https://doi.org/10.1056/NEJMoa1813599>  
PMID:[31340089](https://pubmed.ncbi.nlm.nih.gov/31340089/)
27. Chen N, Hao C, Liu BC, Lin H, Wang C, Xing C, Liang X, Jiang G, Liu Z, Li X, Zuo L, Luo L, Wang J, et al. Roxadustat Treatment for Anemia in Patients Undergoing Long-Term Dialysis. *N Engl J Med.* 2019; 381:1011–22.  
<https://doi.org/10.1056/NEJMoa1901713>  
PMID:[31340116](https://pubmed.ncbi.nlm.nih.gov/31340116/)
28. Akizawa T, Iwasaki M, Otsuka T, Reusch M, Misumi T. Roxadustat Treatment of Chronic Kidney Disease-Associated Anemia in Japanese Patients Not on Dialysis: A Phase 2, Randomized, Double-Blind, Placebo-Controlled Trial. *Adv Ther.* 2019; 36:1438–54.  
<https://doi.org/10.1007/s12325-019-00943-4>  
PMID:[30953333](https://pubmed.ncbi.nlm.nih.gov/30953333/)
29. Chen N, Qian J, Chen J, Yu X, Mei C, Hao C, Jiang G, Lin H, Zhang X, Zuo L, He Q, Fu P, Li X, et al. Phase 2 studies of oral hypoxia-inducible factor prolyl hydroxylase inhibitor FG-4592 for treatment of anemia in China. *Nephrol Dial Transplant.* 2017; 32:1373–86.  
<https://doi.org/10.1093/ndt/gfx011>  
PMID:[28371815](https://pubmed.ncbi.nlm.nih.gov/28371815/)
30. Provenzano R, Besarab A, Wright S, Dua S, Zeig S, Nguyen P, Poole L, Saikali KG, Saha G, Hemmerich S, Szczech L, Yu KH, Neff TB. Roxadustat (FG-4592) Versus Epoetin Alfa for Anemia in Patients Receiving Maintenance Hemodialysis: A Phase 2, Randomized, 6- to 19-Week, Open-Label, Active-Comparator, Dose-Ranging, Safety and Exploratory Efficacy Study. *Am J Kidney Dis.* 2016; 67:912–24.  
<https://doi.org/10.1053/j.ajkd.2015.12.020>  
PMID:[26846333](https://pubmed.ncbi.nlm.nih.gov/26846333/)
31. Besarab A, Provenzano R, Hertel J, Zabaneh R, Klaus SJ, Lee T, Leong R, Hemmerich S, Yu KH, Neff TB. Randomized placebo-controlled dose-ranging and pharmacodynamics study of roxadustat (FG-4592) to treat anemia in nondialysis-dependent chronic kidney disease (NDD-CKD) patients. *Nephrol Dial Transplant.* 2015; 30:1665–73.  
<https://doi.org/10.1093/ndt/gfv302>  
PMID:[26238121](https://pubmed.ncbi.nlm.nih.gov/26238121/)
32. Zheng Q, Wang Y, Yang H, Sun L, Fu X, Wei R, Liu YN, Liu WJ. Efficacy and Safety of Daprodustat for Anemia Therapy in Chronic Kidney Disease Patients: A

- Systematic Review and Meta-Analysis. *Front Pharmacol.* 2021; 11:573645.  
<https://doi.org/10.3389/fphar.2020.573645>  
PMID:33597868
33. Chen H, Cheng Q, Wang J, Zhao X, Zhu S. Long-term efficacy and safety of hypoxia-inducible factor prolyl hydroxylase inhibitors in anaemia of chronic kidney disease: A meta-analysis including 13,146 patients. *J Clin Pharm Ther.* 2021; 46:999–1009.  
<https://doi.org/10.1111/jcpt.13385>  
PMID:33615523
34. Akizawa T, Ueno M, Shiga T, Reusch M. Oral roxadustat three times weekly in ESA-naïve and ESA-converted patients with anemia of chronic kidney disease on hemodialysis: Results from two phase 3 studies. *Ther Apher Dial.* 2020; 24:628–41.  
<https://doi.org/10.1111/1744-9987.13468>  
PMID:31891449
35. Poli M, Asperti M, Ruzzenenti P, Regoni M, Arosio P. Hecpudin antagonists for potential treatments of disorders with hecpidin excess. *Front Pharmacol.* 2014; 5:86.  
<https://doi.org/10.3389/fphar.2014.00086>  
PMID:24808863
36. Atkinson MA, White CT. Hecpudin in anemia of chronic kidney disease: review for the pediatric nephrologist. *Pediatr Nephrol.* 2012; 27:33–40.  
<https://doi.org/10.1007/s00467-011-1832-y>  
PMID:21400189
37. Ganz T. Hecpudin, a key regulator of iron metabolism and mediator of anemia of inflammation. *Blood.* 2003; 102:783–8.  
<https://doi.org/10.1182/blood-2003-03-0672>  
PMID:12663437
38. Zaritsky J, Young B, Wang HJ, Westerman M, Olbina G, Nemeth E, Ganz T, Rivera S, Nissenson AR, Salusky IB. Hecpudin--a potential novel biomarker for iron status in chronic kidney disease. *Clin J Am Soc Nephrol.* 2009; 4:1051–6.  
<https://doi.org/10.2215/CJN.05931108>  
PMID:19406957
39. Zaritsky J, Young B, Gales B, Wang HJ, Rastogi A, Westerman M, Nemeth E, Ganz T, Salusky IB. Reduction of serum hecpidin by hemodialysis in pediatric and adult patients. *Clin J Am Soc Nephrol.* 2010; 5:1010–4.  
<https://doi.org/10.2215/CJN.08161109>  
PMID:20299375
40. Akizawa T, Tsubakihara Y, Nangaku M, Endo Y, Nakajima H, Kohno T, Imai Y, Kawase N, Hara K, Lepore J, Cobitz A. Effects of Daprodustat, a Novel Hypoxia-Inducible Factor Prolyl Hydroxylase Inhibitor on Anemia Management in Japanese Hemodialysis Subjects. *Am J Nephrol.* 2017; 45:127–35.  
<https://doi.org/10.1159/000454818>  
PMID:27978511
41. Akizawa T, Nangaku M, Yonekawa T, Okuda N, Kawamatsu S, Onoue T, Endo Y, Hara K, Cobitz AR. Efficacy and Safety of Daprodustat Compared with Darbepoetin Alfa in Japanese Hemodialysis Patients with Anemia: A Randomized, Double-Blind, Phase 3 Trial. *Clin J Am Soc Nephrol.* 2020; 15:1155–65.  
<https://doi.org/10.2215/CJN.16011219>  
PMID:32723804
42. Bailey CK, Caltabiano S, Cobitz AR, Huang C, Mahar KM, Patel VV. A randomized, 29-day, dose-ranging, efficacy and safety study of daprodustat, administered three times weekly in patients with anemia on hemodialysis. *BMC Nephrol.* 2019; 20:372.  
<https://doi.org/10.1186/s12882-019-1547-z>  
PMID:31619187
43. Brigandi RA, Johnson B, Oei C, Westerman M, Olbina G, de Zoysa J, Roger SD, Sahay M, Cross N, McMahon L, Guptha V, Smolyarchuk EA, Singh N, et al, and PHI112844 Investigators. A Novel Hypoxia-Inducible Factor-Prolyl Hydroxylase Inhibitor (GSK1278863) for Anemia in CKD: A 28-Day, Phase 2A Randomized Trial. *Am J Kidney Dis.* 2016; 67:861–71.  
<https://doi.org/10.1053/j.ajkd.2015.11.021>  
PMID:26827289
44. Holdstock L, Meadowcroft AM, Maier R, Johnson BM, Jones D, Rastogi A, Zeig S, Lepore JJ, Cobitz AR. Four-Week Studies of Oral Hypoxia-Inducible Factor-Prolyl Hydroxylase Inhibitor GSK1278863 for Treatment of Anemia. *J Am Soc Nephrol.* 2016; 27:1234–44.  
<https://doi.org/10.1681/ASN.2014111139>  
PMID:26494831
45. Meadowcroft AM, Cizman B, Holdstock L, Biswas N, Johnson BM, Jones D, Nossuli AK, Lepore JJ, Aarup M, Cobitz AR. Daprodustat for anemia: a 24-week, open-label, randomized controlled trial in participants on hemodialysis. *Clin Kidney J.* 2019; 12:139–48.  
<https://doi.org/10.1093/ckj/sfy014>  
PMID:30746141
46. Singh AK, Carroll K, McMurray JJV, Solomon S, Jha V, Johansen KL, Lopes RD, Macdougall IC, Obrador GT, Waikar SS, Wanner C, Wheeler DC, Więcek A, et al, and ASCEND-ND Study Group. Daprodustat for the Treatment of Anemia in Patients Not Undergoing Dialysis. *N Engl J Med.* 2021; 385:2313–24.  
<https://doi.org/10.1056/NEJMoa2113380>  
PMID:34739196
47. Akizawa T, Iwasaki M, Yamaguchi Y, Majikawa Y, Reusch M. Phase 3, Randomized, Double-Blind, Active-Comparator (Darbepoetin Alfa) Study of Oral Roxadustat in CKD Patients with Anemia on Hemodialysis in Japan. *J Am Soc Nephrol.* 2020; 31:1628–39.

- <https://doi.org/10.1681/ASN.2019060623>  
PMID:[32493693](https://pubmed.ncbi.nlm.nih.gov/32493693/)
48. Barratt J, Sulowicz W, Schömig M, Esposito C, Reusch M, Young J, Csiky B. Efficacy and Cardiovascular Safety of Roxadustat in Dialysis-Dependent Chronic Kidney Disease: Pooled Analysis of Four Phase 3 Studies. *Adv Ther.* 2021; 38:5345–60.  
<https://doi.org/10.1007/s12325-021-01903-7>  
PMID:[34523074](https://pubmed.ncbi.nlm.nih.gov/34523074/)
49. Chen J, Li Z, Zhang H, Hu J, Wang J, Zhou H, Liu Y, Liu J, Yi B, Zhang W. A Prospective, Self-Controlled Pilot Study of the Efficacy of Roxadustat for Erythropoietin Hyporesponsiveness in Patients Requiring Chronic Ambulatory Peritoneal Dialysis. *J Ren Nutr.* 2022; 32:595–604.  
<https://doi.org/10.1053/j.jrn.2021.09.003>  
PMID:[34756787](https://pubmed.ncbi.nlm.nih.gov/34756787/)
50. Csiky B, Schömig M, Esposito C, Barratt J, Reusch M, Valluri U, Sulowicz W. Roxadustat for the Maintenance Treatment of Anemia in Patients with End-Stage Kidney Disease on Stable Dialysis: A European Phase 3, Randomized, Open-Label, Active-Controlled Study (PYRENEES). *Adv Ther.* 2021; 38:5361–80.  
<https://doi.org/10.1007/s12325-021-01904-6>  
PMID:[34537926](https://pubmed.ncbi.nlm.nih.gov/34537926/)
51. Hou YP, Mao XY, Wang C, Xu ZH, Bu ZH, Xu M, Li B. Roxadustat treatment for anemia in peritoneal dialysis patients: A randomized controlled trial. *J Formos Med Assoc.* 2022; 121:529–38.  
<https://doi.org/10.1016/j.jfma.2021.06.004>  
PMID:[34167878](https://pubmed.ncbi.nlm.nih.gov/34167878/)
52. Provenzano R, Shutov E, Eremeeva L, Korneyeva S, Poole L, Saha G, Bradley C, Eyassu M, Besarab A, Leong R, Liu CS, Neff TB, Szczech L, Yu KP. Roxadustat for anemia in patients with end-stage renal disease incident to dialysis. *Nephrol Dial Transplant.* 2021; 36:1717–30.  
<https://doi.org/10.1093/ndt/gfab051>  
PMID:[33629100](https://pubmed.ncbi.nlm.nih.gov/33629100/)
53. Akizawa T, Macdougall IC, Berns JS, Yamamoto H, Taguchi M, Iekushi K, Bernhardt T. Iron Regulation by Molidustat, a Daily Oral Hypoxia-Inducible Factor Prolyl Hydroxylase Inhibitor, in Patients with Chronic Kidney Disease. *Nephron.* 2019; 143:243–54.  
<https://doi.org/10.1159/000502012>  
PMID:[31387097](https://pubmed.ncbi.nlm.nih.gov/31387097/)
54. Akizawa T, Macdougall IC, Berns JS, Bernhardt T, Staedtler G, Taguchi M, Iekushi K, Krueger T. Long-Term Efficacy and Safety of Molidustat for Anemia in Chronic Kidney Disease: DIALOGUE Extension Studies. *Am J Nephrol.* 2019; 49:271–80.  
<https://doi.org/10.1159/000499111>  
PMID:[30852574](https://pubmed.ncbi.nlm.nih.gov/30852574/)
55. Akizawa T, Yamada T, Nobori K, Matsuda Y, Hayashi Y, Hayasaki T, Yamamoto H. Molidustat for Japanese Patients With Renal Anemia Receiving Dialysis. *Kidney Int Rep.* 2021; 6:2604–16.  
<https://doi.org/10.1016/j.ekir.2021.07.015>  
PMID:[34622100](https://pubmed.ncbi.nlm.nih.gov/34622100/)
56. Macdougall IC, Akizawa T, Berns JS, Bernhardt T, Krueger T. Effects of Molidustat in the Treatment of Anemia in CKD. *Clin J Am Soc Nephrol.* 2019; 14:28–39.  
<https://doi.org/10.2215/CJN.02510218>  
PMID:[30559105](https://pubmed.ncbi.nlm.nih.gov/30559105/)
57. Akizawa T, Nangaku M, Yamaguchi T, Arai M, Koretomo R, Maeda K, Miyazawa Y, Hirakata H. Enarodustat, Conversion and Maintenance Therapy for Anemia in Hemodialysis Patients: A Randomized, Placebo-Controlled Phase 2b Trial Followed by Long-Term Trial. *Nephron.* 2019; 143:77–85.  
<https://doi.org/10.1159/000500487>  
PMID:[31117088](https://pubmed.ncbi.nlm.nih.gov/31117088/)
58. Akizawa T, Nangaku M, Yamaguchi T, Koretomo R, Maeda K, Miyazawa Y, Hirakata H. A Phase 3 Study of Enarodustat (JTZ-951) in Japanese Hemodialysis Patients for Treatment of Anemia in Chronic Kidney Disease: SYMPHONY HD Study. *Kidney Dis (Basel).* 2021; 7:494–502.  
<https://doi.org/10.1159/000517053>  
PMID:[34901195](https://pubmed.ncbi.nlm.nih.gov/34901195/)
59. Eckardt KU, Agarwal R, Aswad A, Awad A, Block GA, Bacci MR, Farag YMK, Fishbane S, Hubert H, Jardine A, Khawaja Z, Koury MJ, Maroni BJ, et al. Safety and Efficacy of Vadadustat for Anemia in Patients Undergoing Dialysis. *N Engl J Med.* 2021; 384:1601–12.  
<https://doi.org/10.1056/NEJMoa2025956>  
PMID:[33913638](https://pubmed.ncbi.nlm.nih.gov/33913638/)
60. Nangaku M, Farag YMK, deGoma E, Luo W, Vargo D, Khawaja Z. Vadadustat, an oral hypoxia-inducible factor prolyl hydroxylase inhibitor, for treatment of anemia of chronic kidney disease: two randomized Phase 2 trials in Japanese patients. *Nephrol Dial Transplant.* 2020; gfaa060.  
<https://doi.org/10.1093/ndt/gfaa060>  
PMID:[32719868](https://pubmed.ncbi.nlm.nih.gov/32719868/)
61. Nangaku M, Kondo K, Ueta K, Kokado Y, Kaneko G, Matsuda H, Kawaguchi Y, Komatsu Y. Efficacy and safety of vadadustat compared with darbepoetin alfa in Japanese anemic patients on hemodialysis: a Phase 3, multicenter, randomized, double-blind study. *Nephrol Dial Transplant.* 2021; 36:1731–41.  
<https://doi.org/10.1093/ndt/gfab055>  
PMID:[33650630](https://pubmed.ncbi.nlm.nih.gov/33650630/)

SUPPLEMENTARY MATERIALS

Supplementary Figures

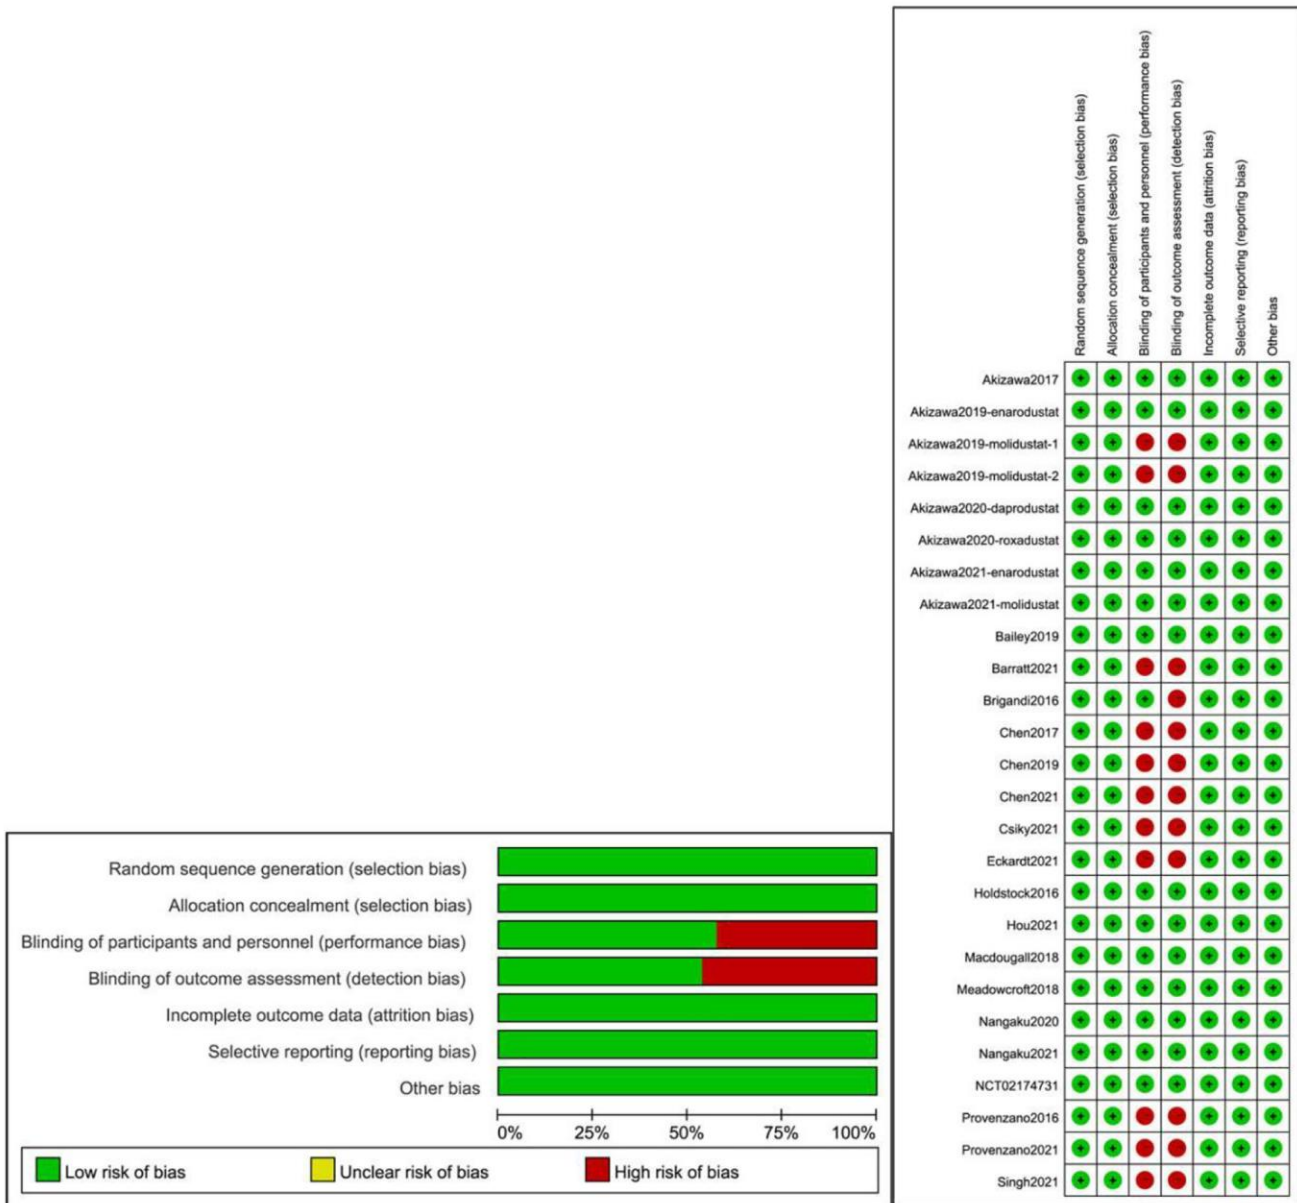

Supplementary Figure 1. Bias assessment. The Cochrane risk-of-bias tool assessed the risk of bias in included studies.

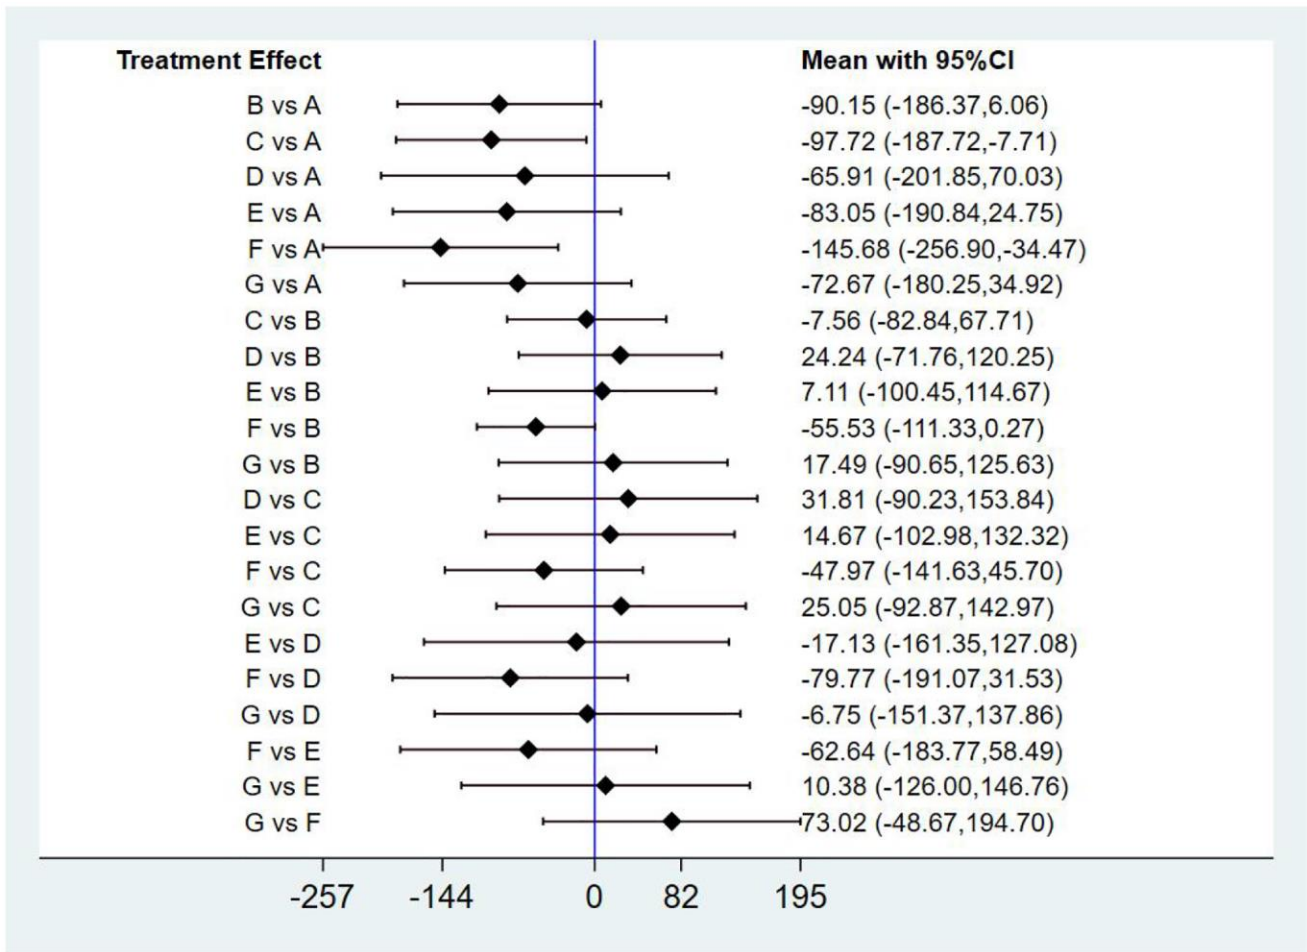

**Supplementary Figure 2. Forest plot of ferritin.** Abbreviations: A: placebo/control; B: ESAs; C: daprodustat; D: molidustat; E: vadadustat; F: roxadustat; G: enarodustat.



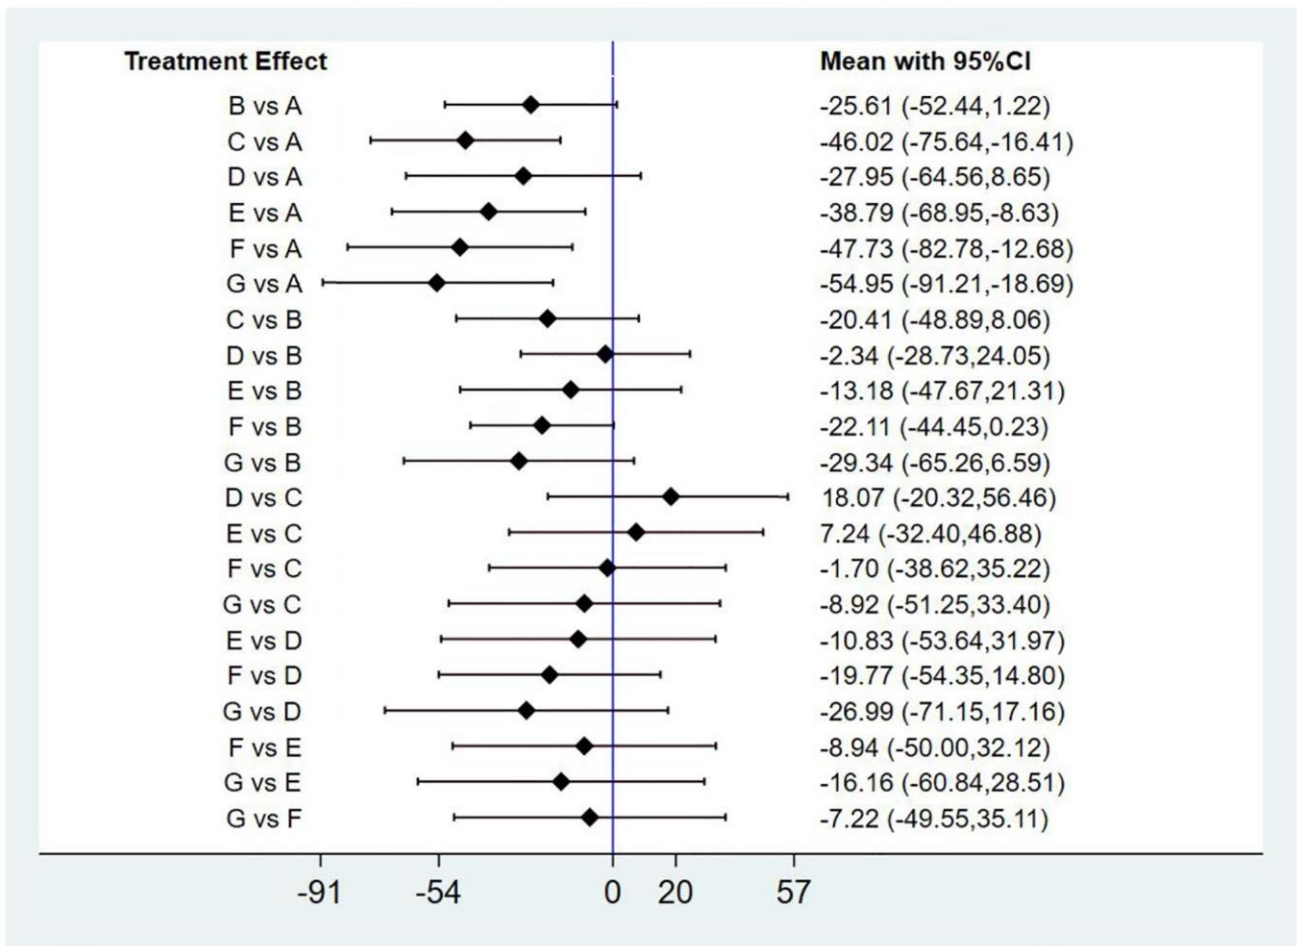

**Supplementary Figure 3. Forest plots of hepcidin.** Abbreviations: A: placebo/control; B: ESAs; C: daprodustat; D: molidustat; E: vadadustat; F: roxadustat; G: enarodustat.

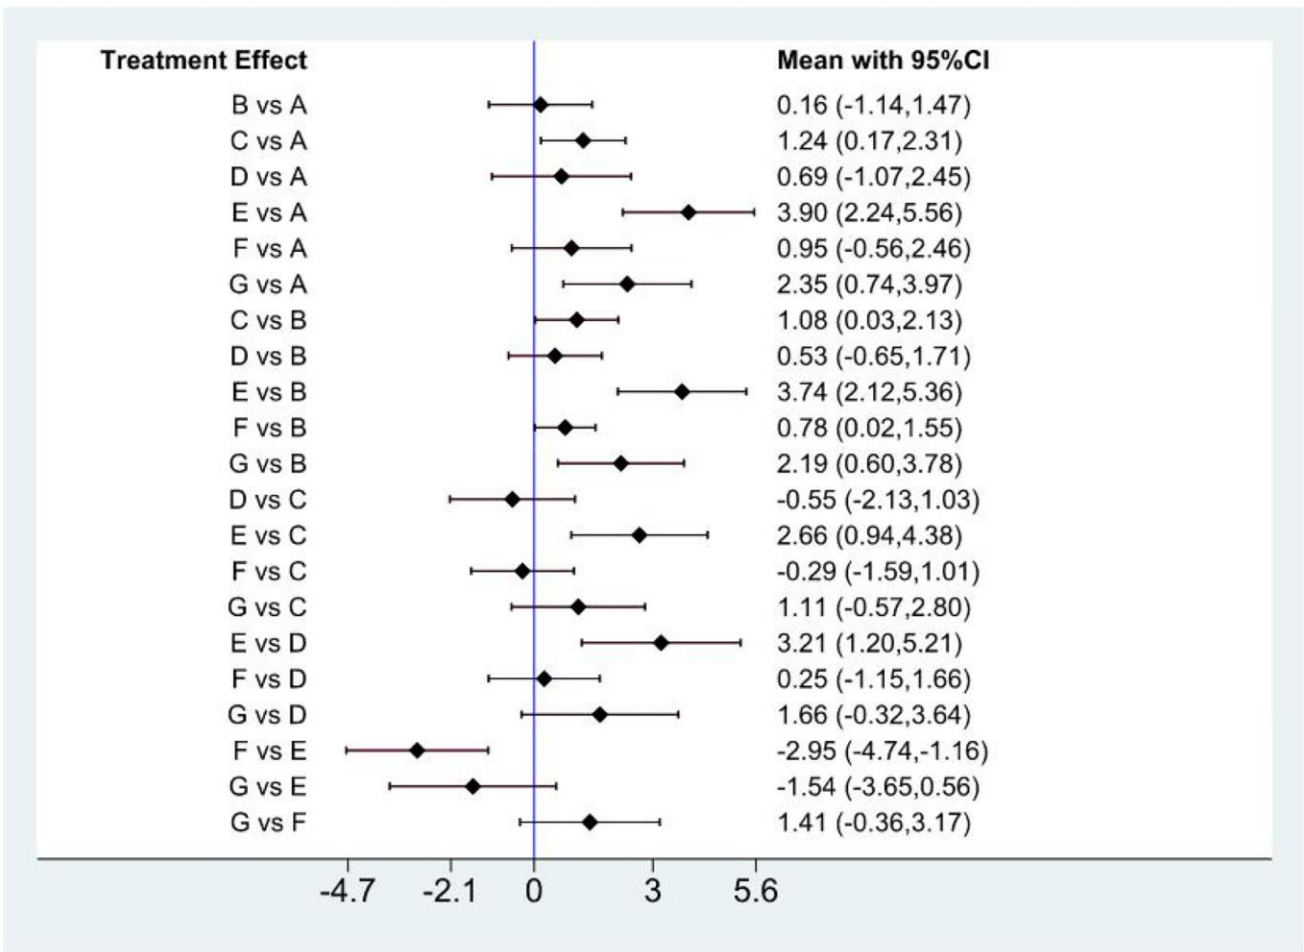

**Supplementary Figure 4. Forest plots of TIBC.** Abbreviations: A: placebo/control; B: ESAs; C: daprodustat; D: molidustat; E: vadadustat; F: roxadustat; G: enarodustat.

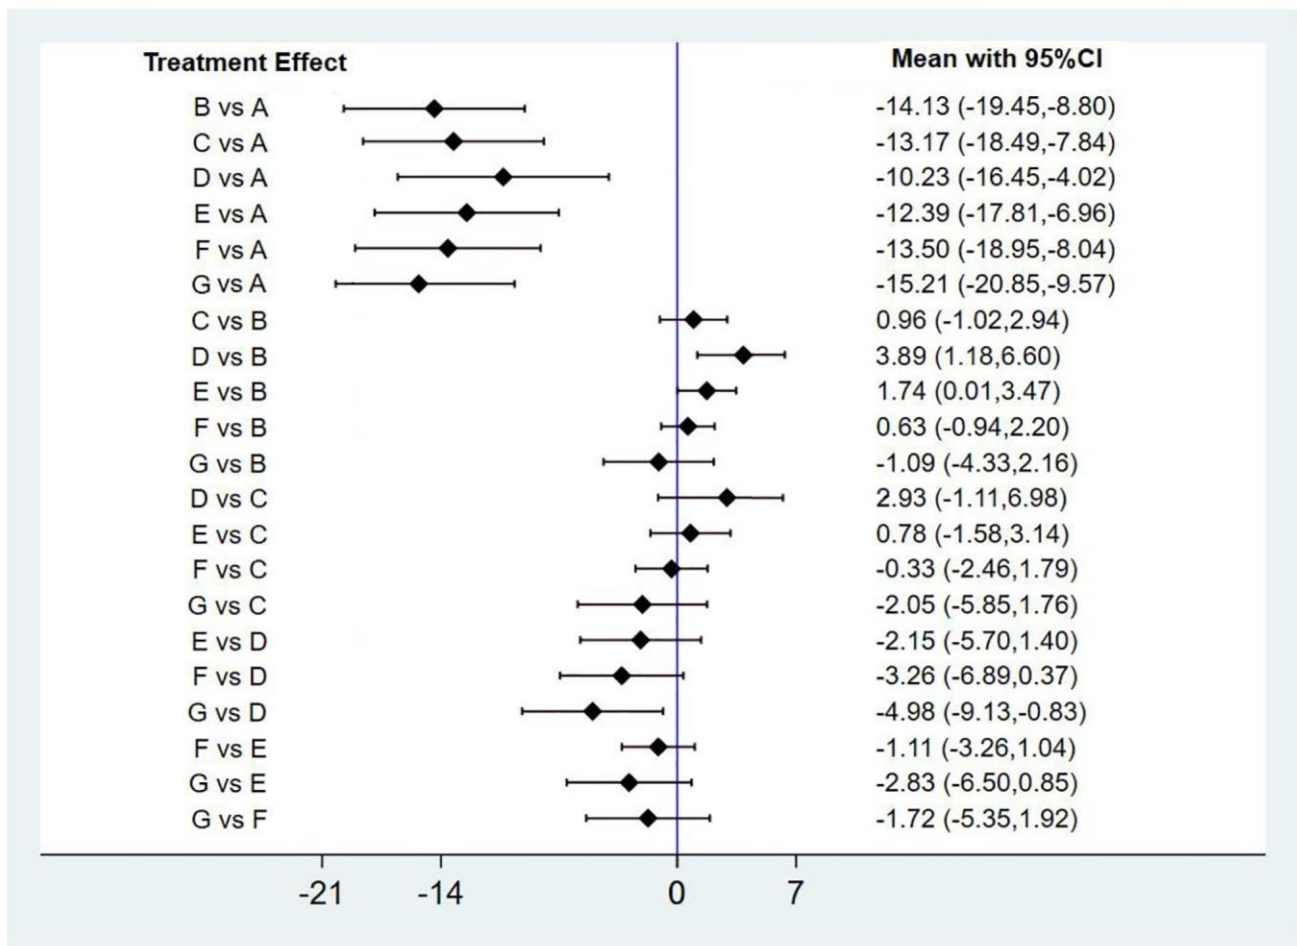

**Supplementary Figure 5. Forest plots of TSAT.** Abbreviations: A: placebo/control; B: ESAs; C: daprodustat; D: molidustat; E: vadadustat; F: roxadustat; G: enarodustat.

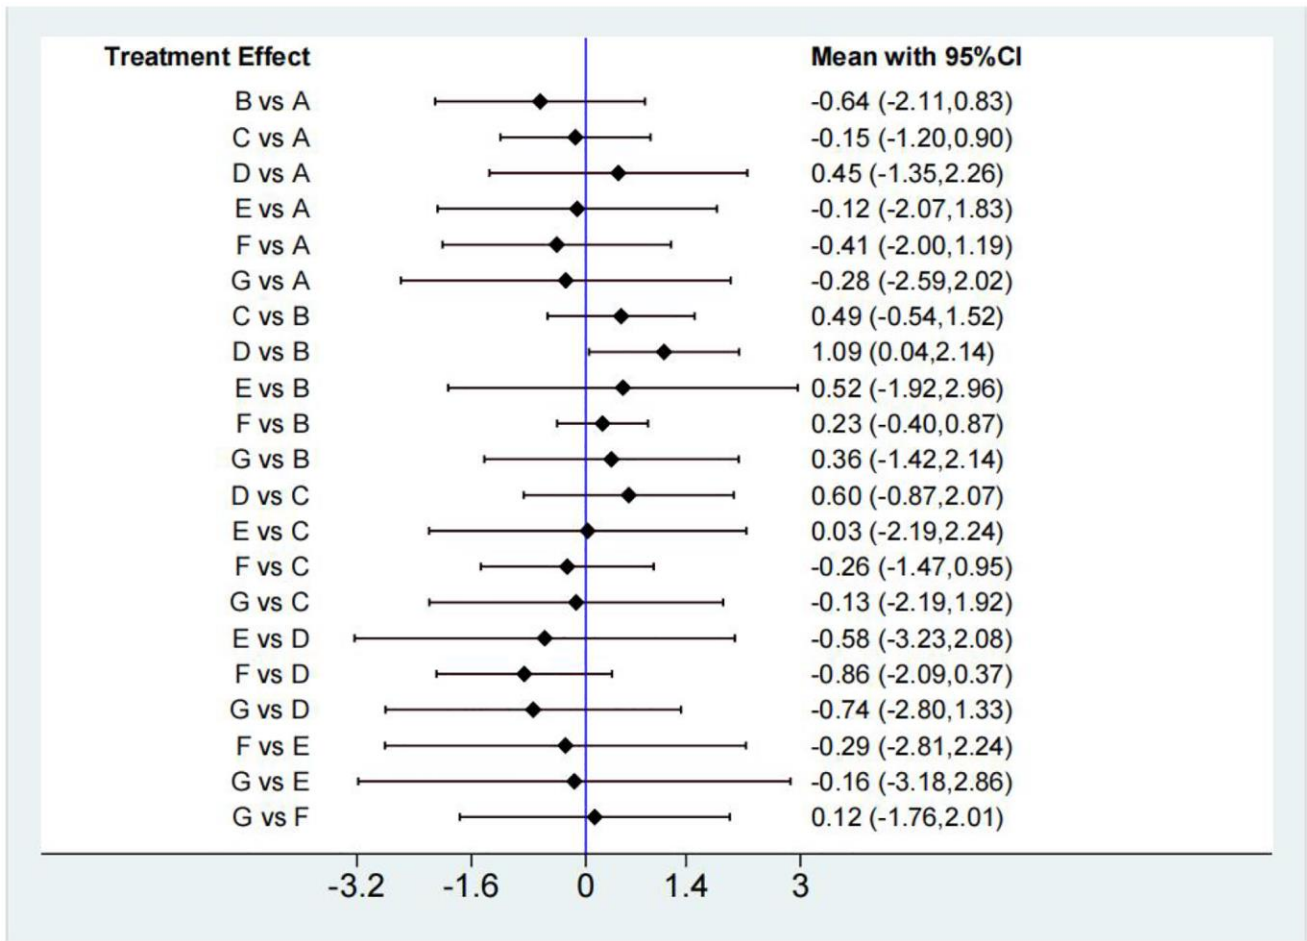

**Supplementary Figure 6. Forest plots of serum iron.** Abbreviations: A: placebo/control; B: ESAs; C: daprodustat; D: molidustat; E: vadadustat; F: roxadustat; G: enarodustat.

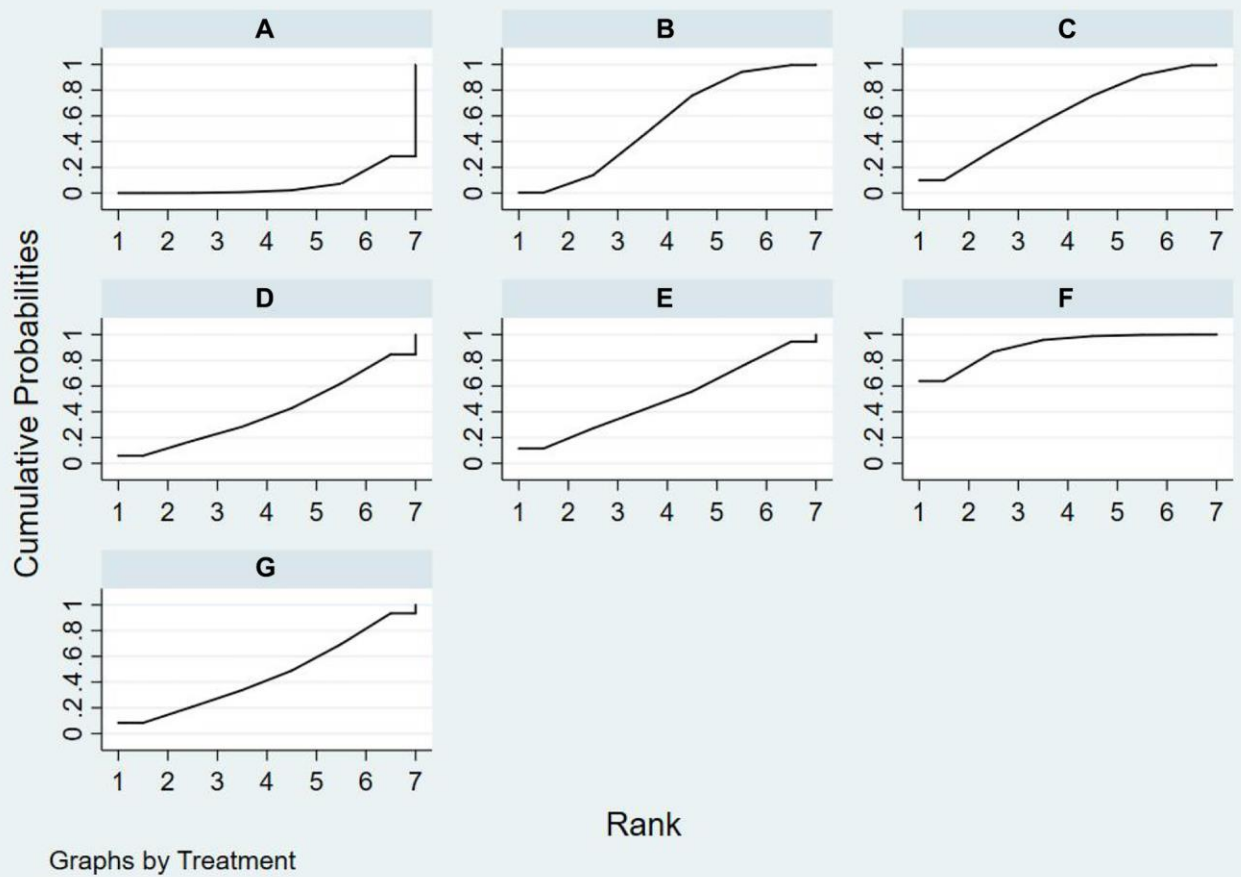

**Supplementary Figure 7. The surface under the cumulative ranking curve for ferritin.** (A) Placebo/control; (B) ESAs; (C) daprodustat; (D) molidustat; (E) vadadustat; (F) roxadustat; (G) enarodustat.

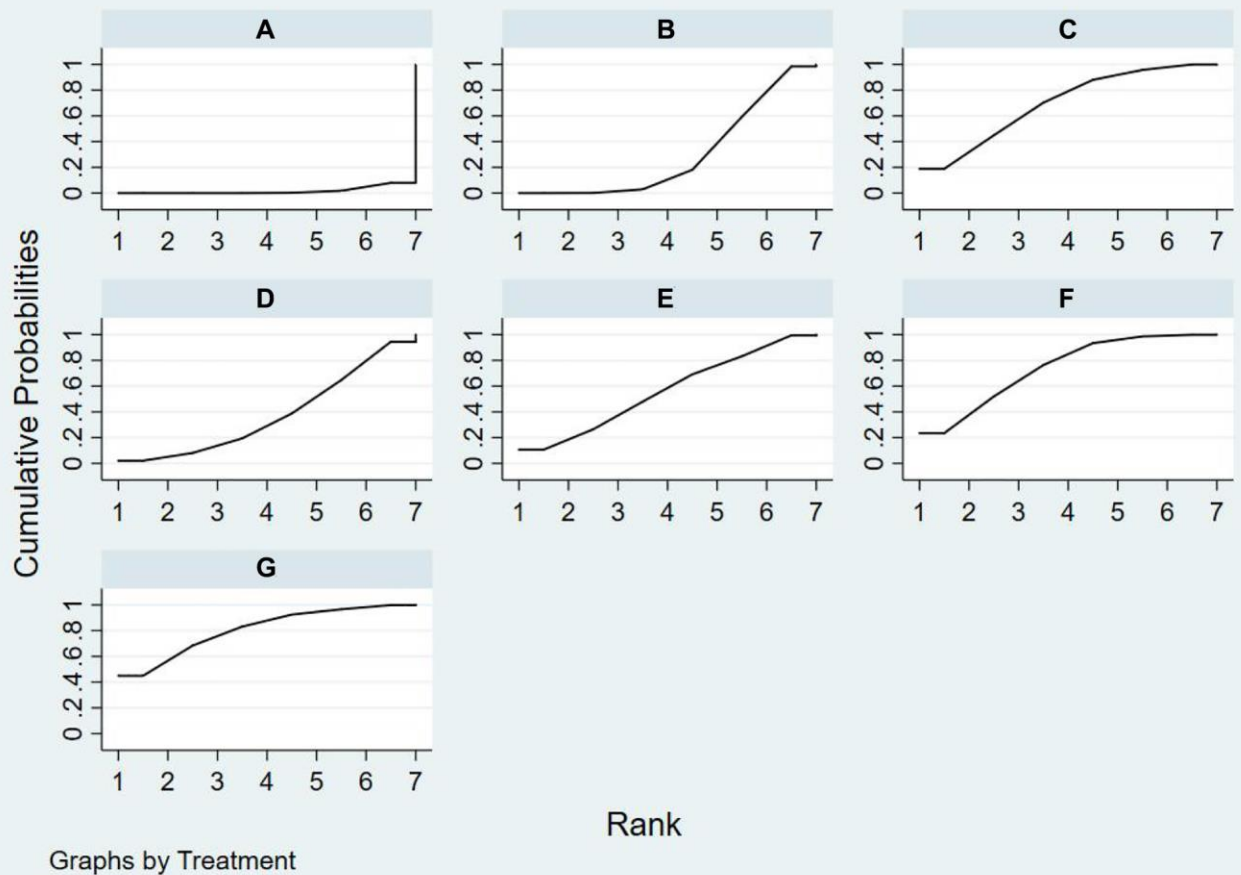

**Supplementary Figure 8. The surface under the cumulative ranking curve for hepcidin. (A) Placebo/control; (B) ESAs; (C) daprodustat; (D) molidustat; (E) vadadustat; (F) roxadustat; (G) enarodustat.**

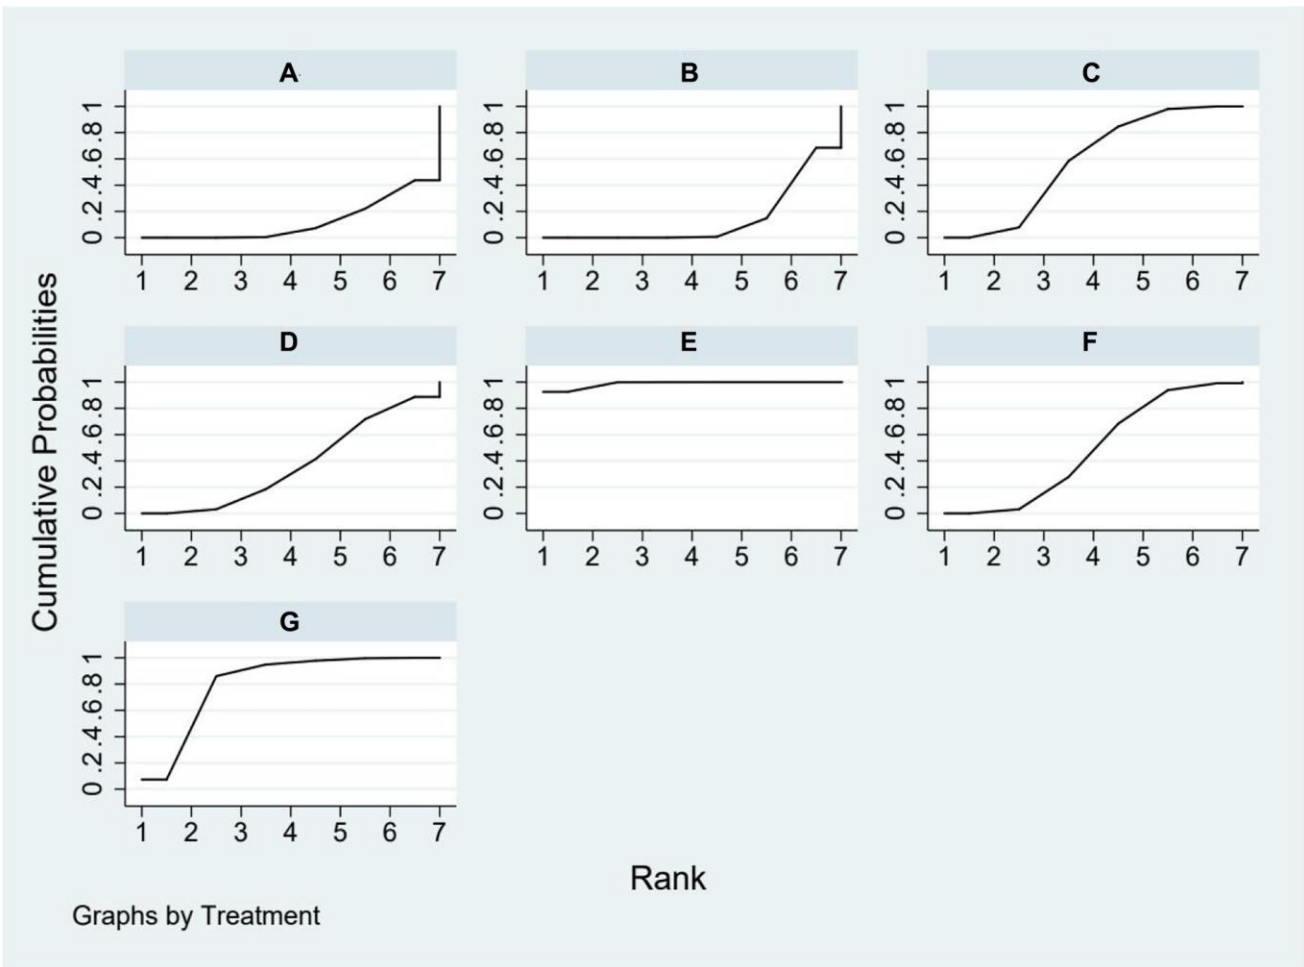

**Supplementary Figure 9. The surface under the cumulative ranking curve for TIBC. (A) Placebo/control; (B) ESAs; (C) daprodustat; (D) molidustat; (E) vadadustat; (F) roxadustat; (G) enarodustat.**

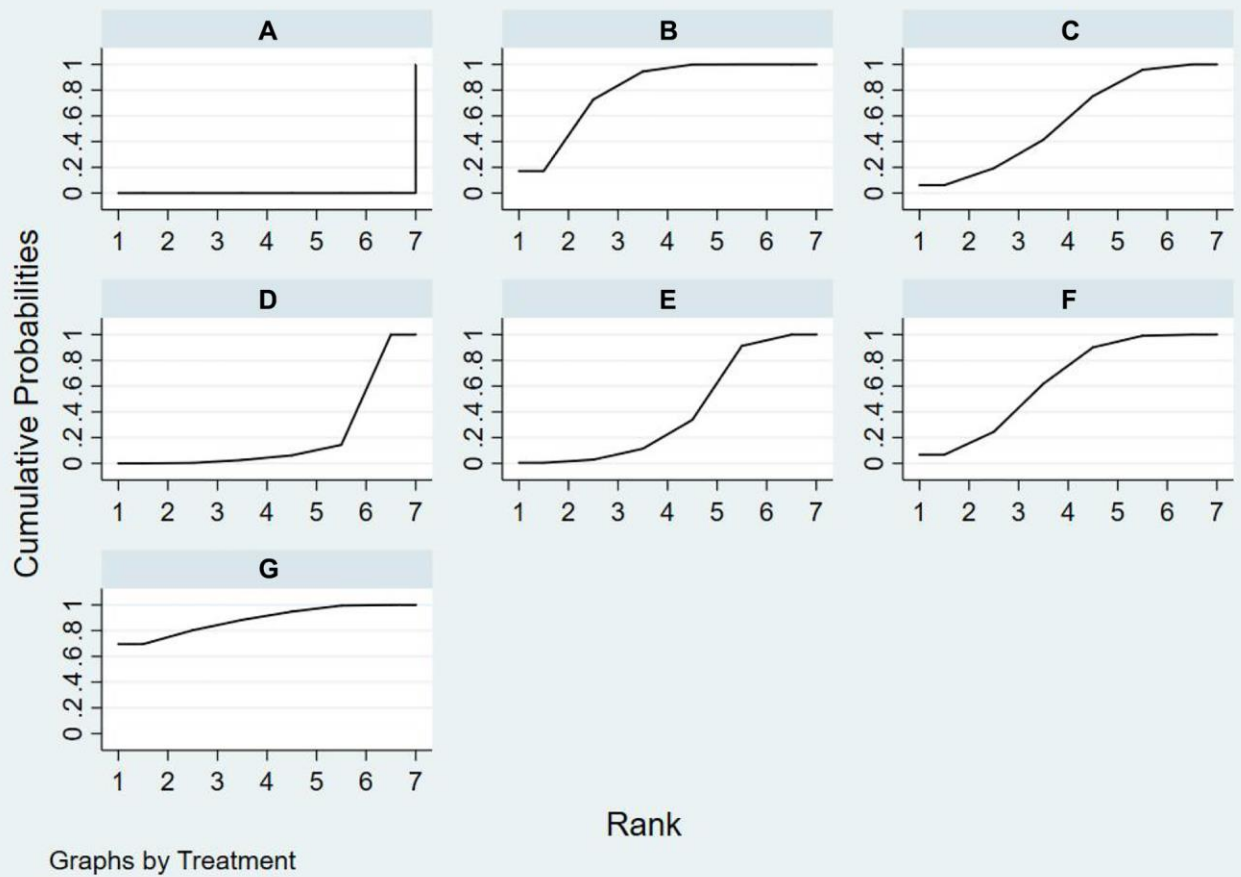

**Supplementary Figure 10. The surface under the cumulative ranking curve for TSAT.** (A) Placebo/control; (B) ESAs; (C) daprodustat; (D) molidustat; (E) vadadustat; (F) roxadustat; (G) enarodustat.



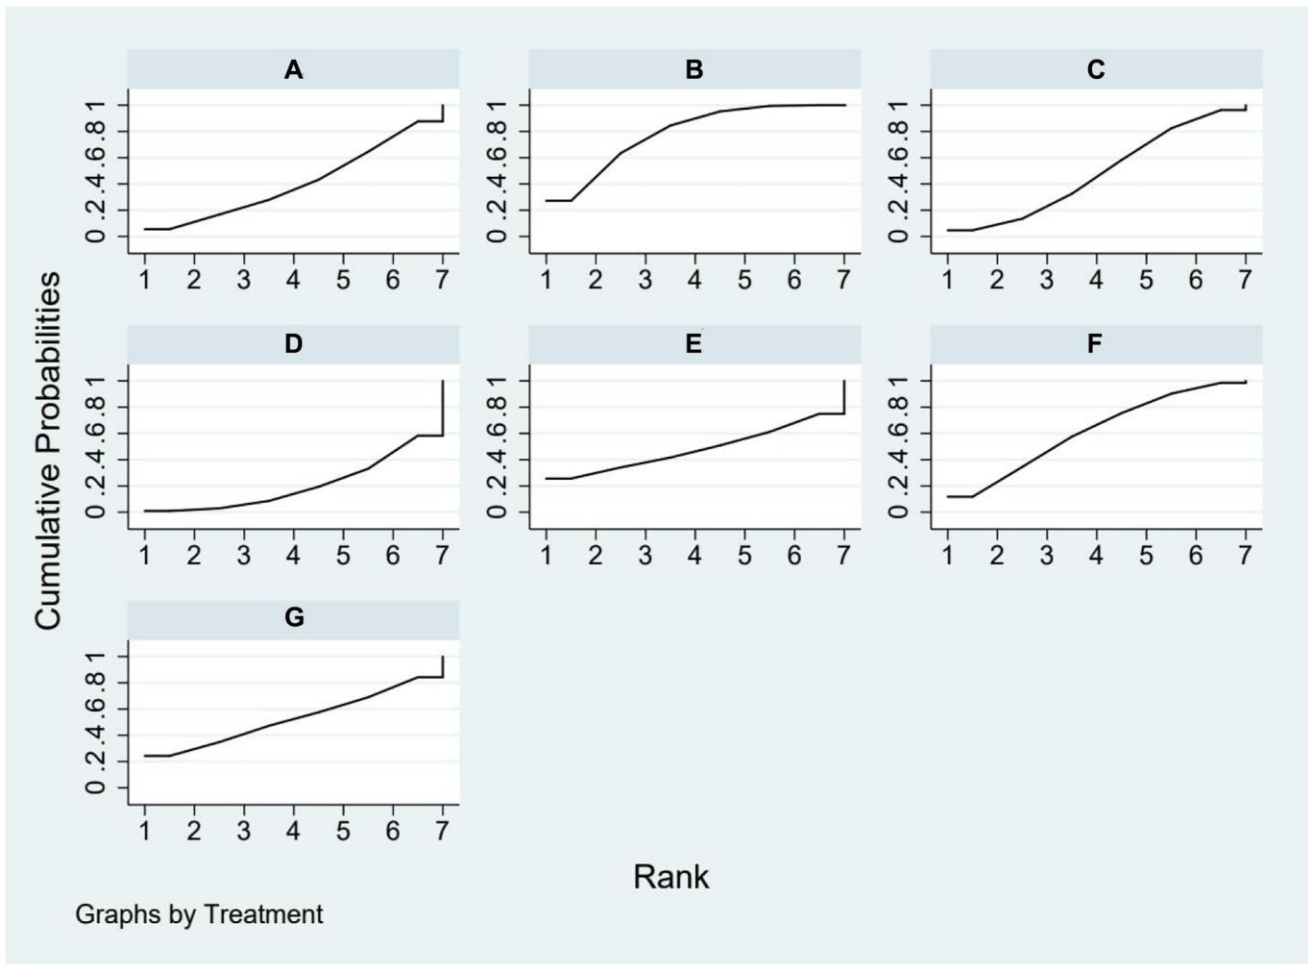

**Supplementary Figure 11. The surface under the cumulative ranking curve for serum iron. (A) Placebo/control; (B) ESAs; (C) daprodustat; (D) molidustat; (E) vadadustat; (F) roxadustat; (G) enarodustat.**

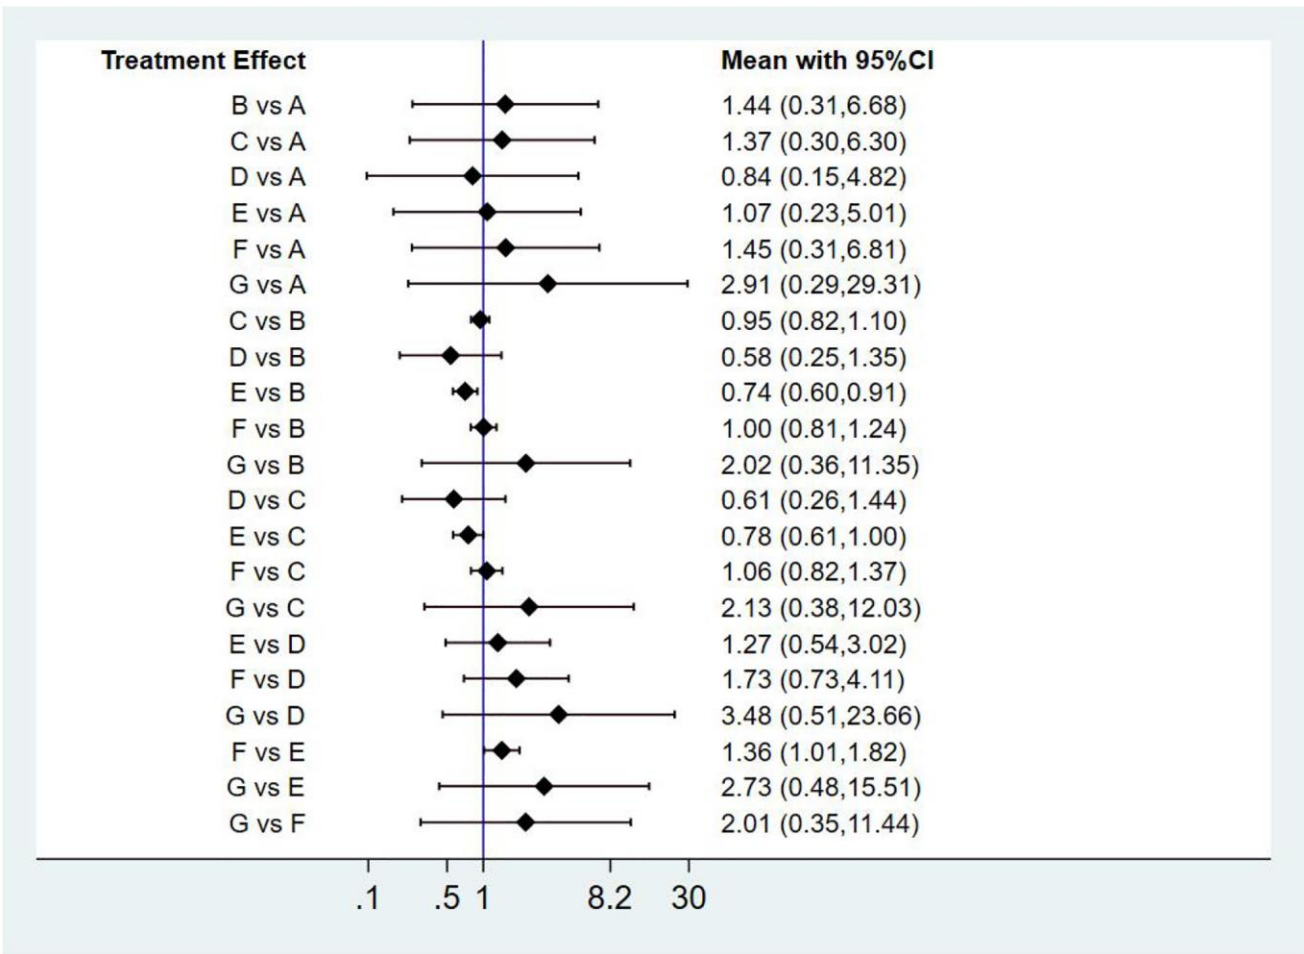

**Supplementary Figure 12. Forest plots of hypertension.** Abbreviations: A: placebo/control; B: ESAs; C: daprodustat; D: molidustat; E: vadadustat; F: roxadustat; G: enarodustat.

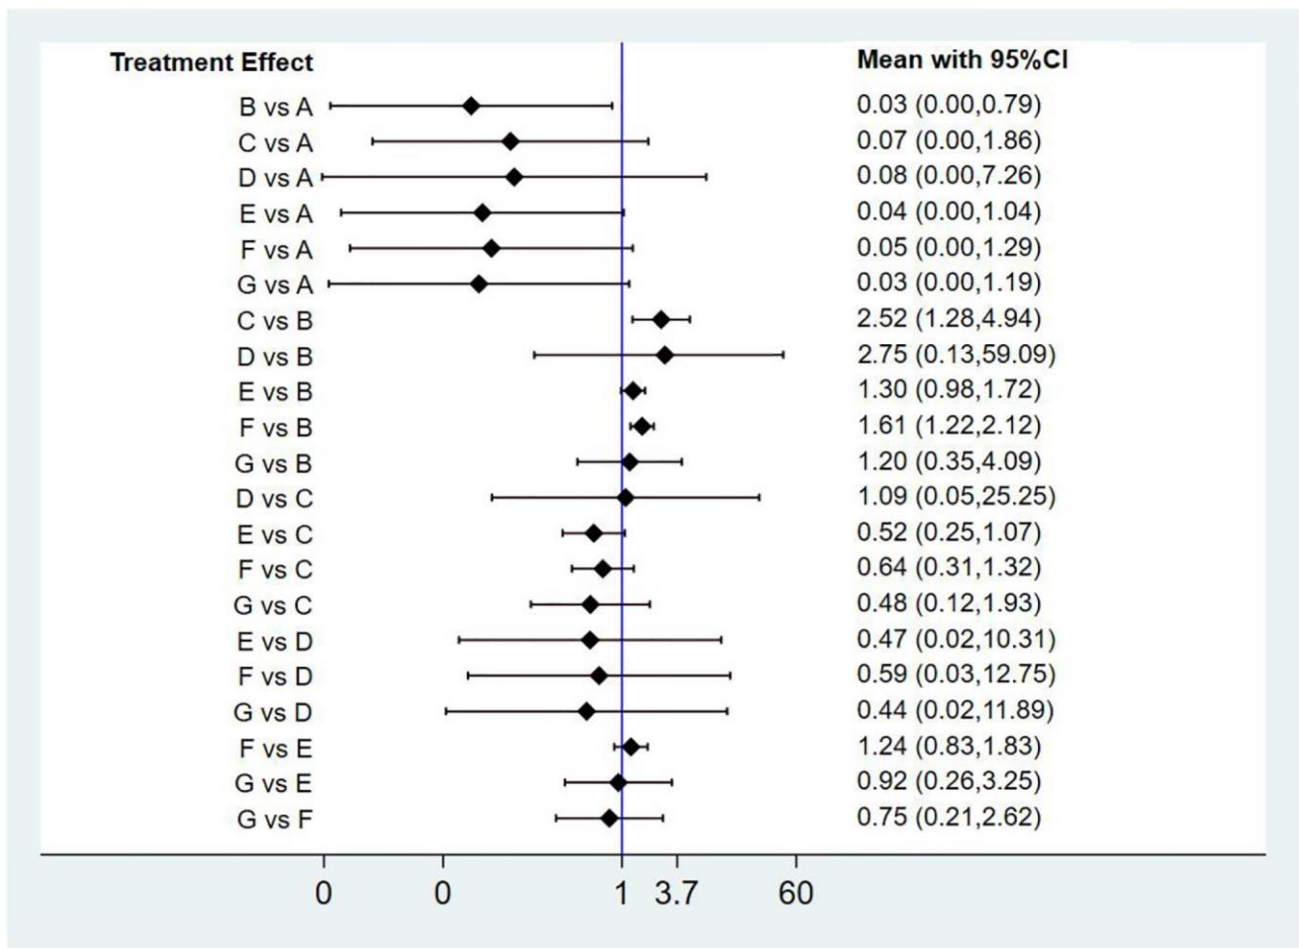

**Supplementary Figure 13. Forest plots of thrombosis.** Abbreviations: A: placebo/control; B: ESAs; C: daprodustat; D: molidustat; E: vadadustat; F: roxadustat; G: enarodustat.

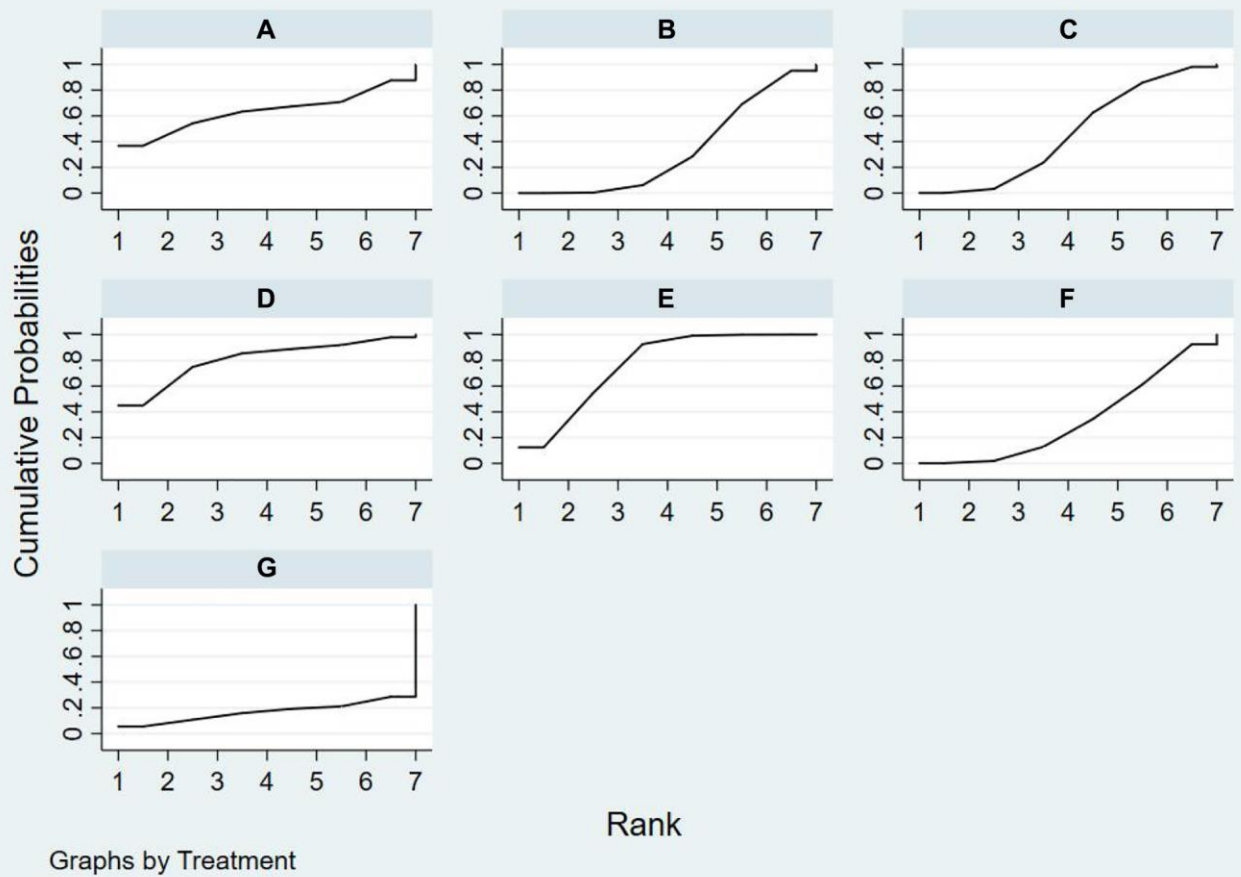

**Supplementary Figure 14. The surface under the cumulative ranking curve for hypertension. (A) Placebo/control; (B) ESAs; (C) daprodustat; (D) molidustat; (E) vadadustat; (F) roxadustat; (G) enarodustat.**

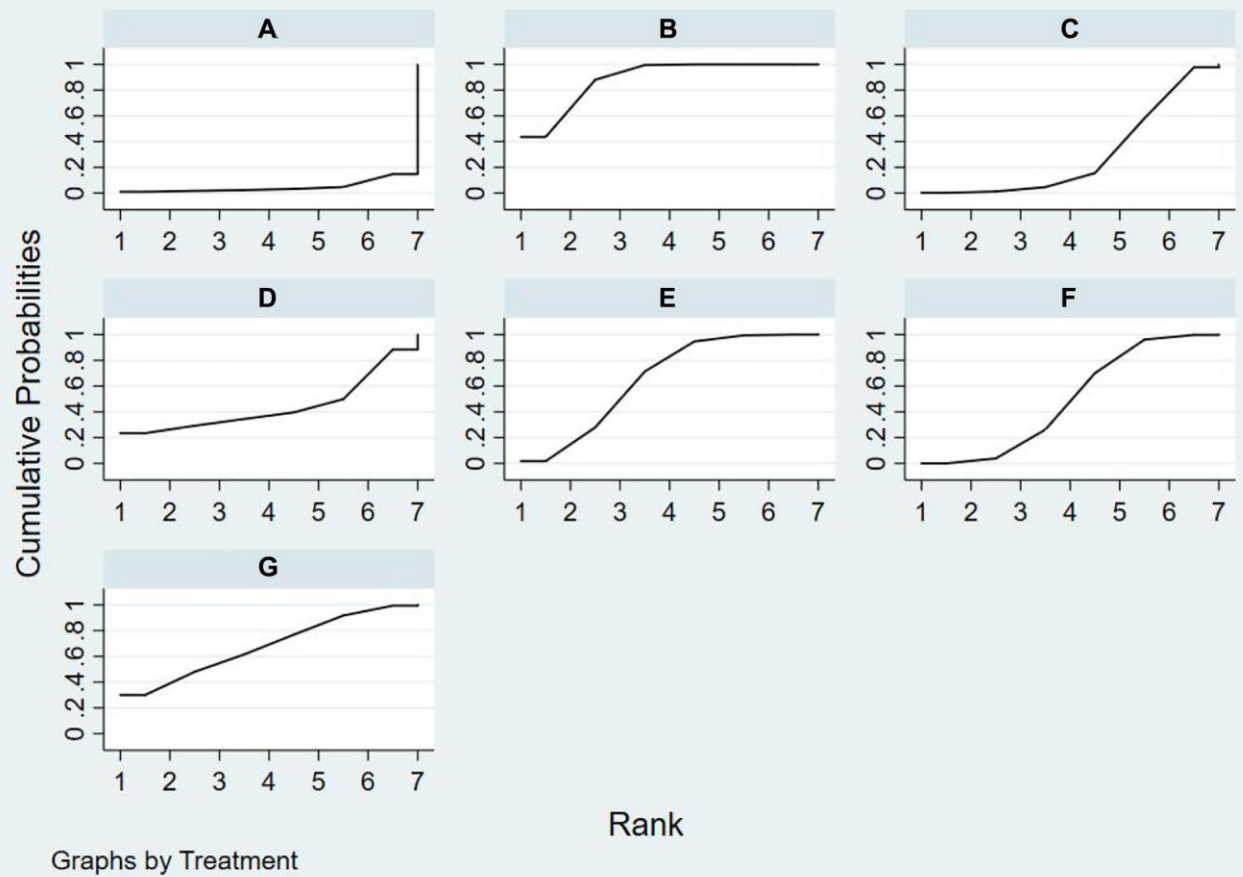

**Supplementary Figure 15. The surface under the cumulative ranking curve for thrombosis. (A) Placebo/control; (B) ESAs; (C) daprodustat; (D) molidustat; (E) vadadustat; (F) roxadustat; (G) enarodustat.**

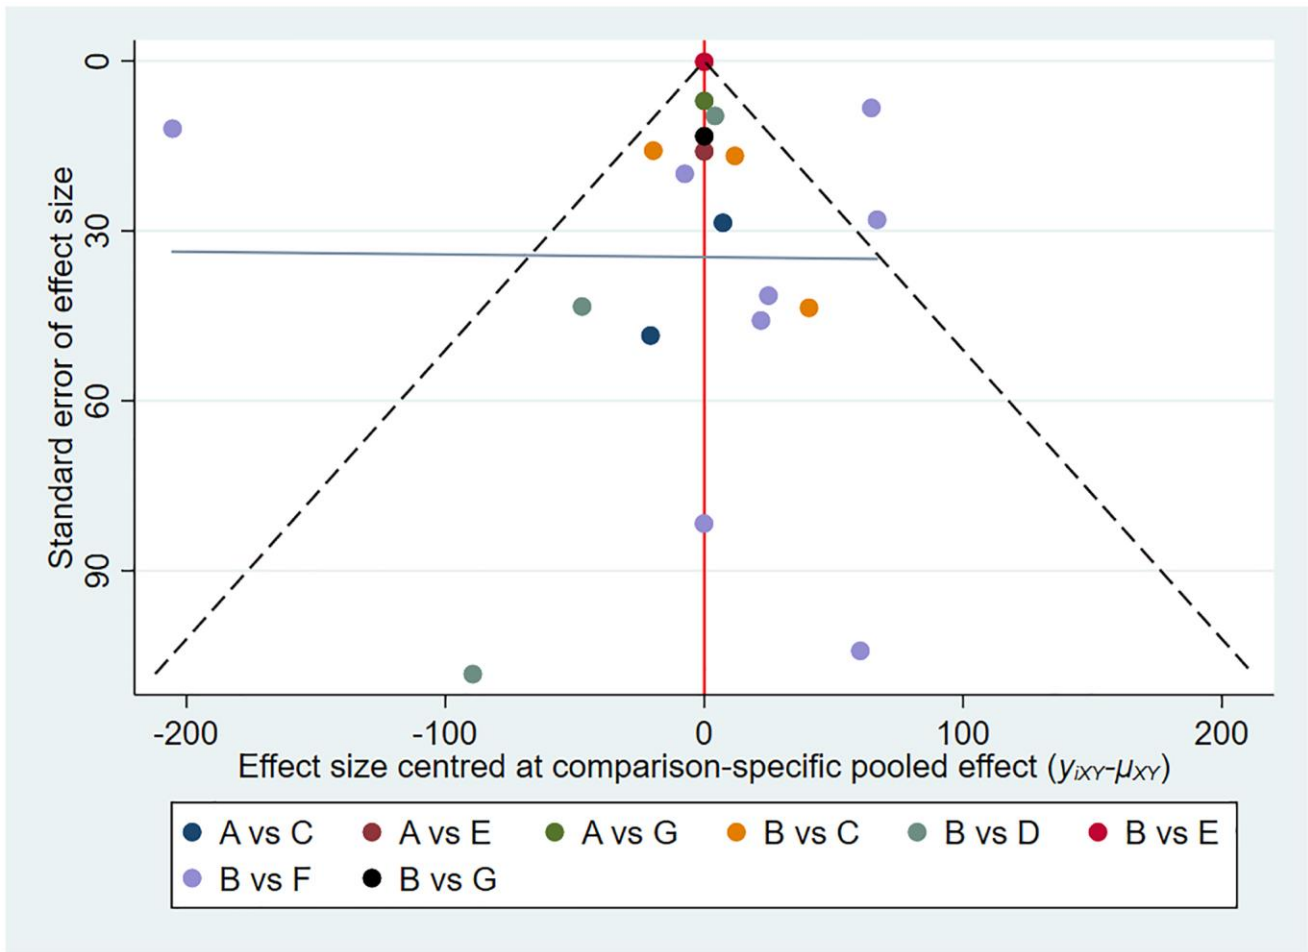

**Supplementary Figure 16. Funnel plot assessing ferritin.** Abbreviations: A: placebo/control; B: ESAs; C: daprodustat; D: molidustat; E: vadadustat; F: roxadustat; G: enarodustat.

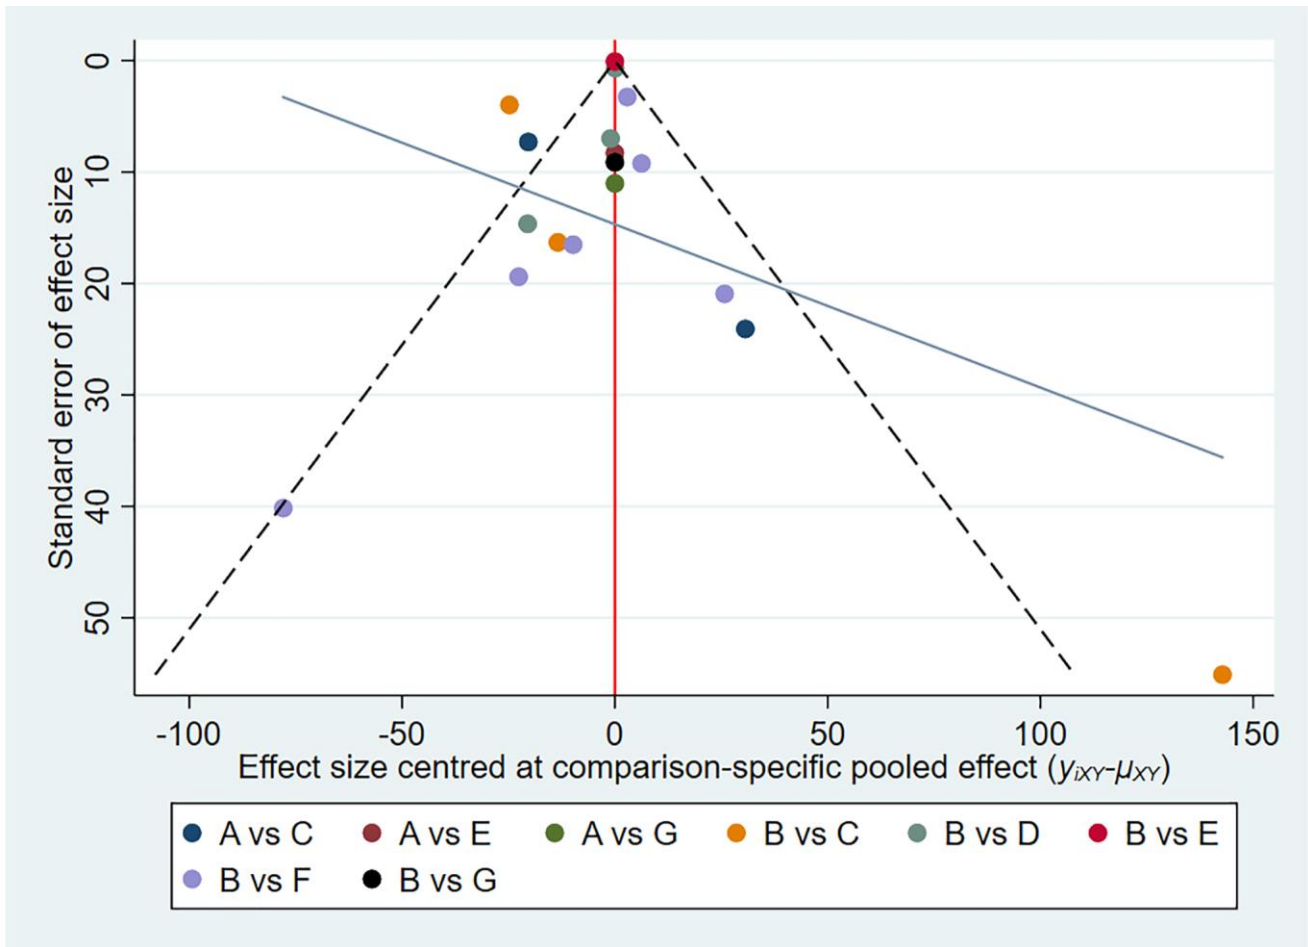

**Supplementary Figure 17. Funnel plot evaluating hepcidin.** Abbreviations: A: placebo/control; B: ESAs; C: daprodustat; D: molidustat; E: vadadustat; F: roxadustat; G: enarodustat.

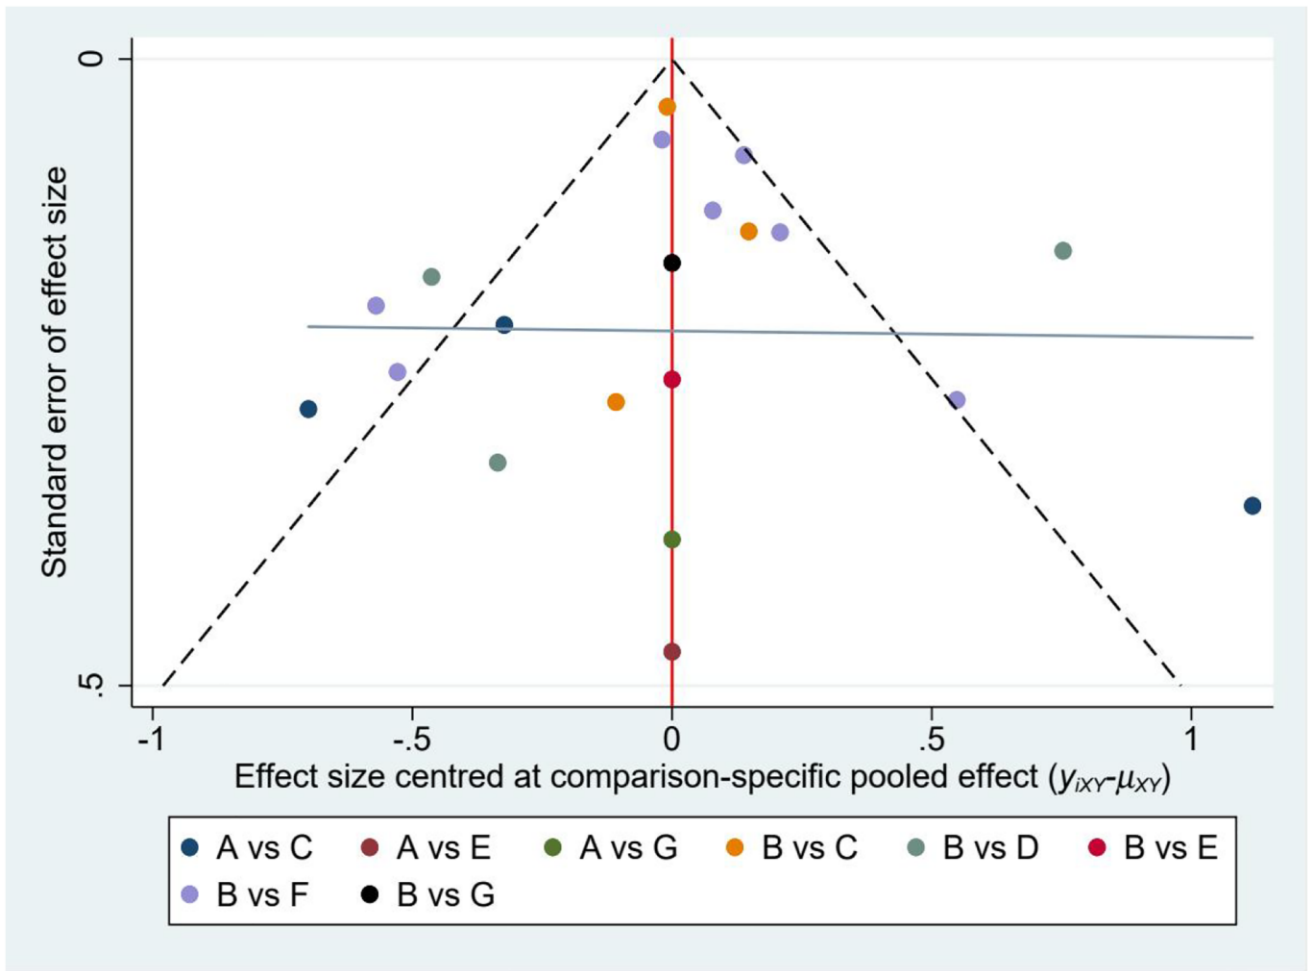

**Supplementary Figure 18. Funnel plot evaluating TIBC.** Abbreviations: A: placebo/control; B: ESAs; C: daprodustat; D: molidustat; E: vadadustat; F: roxadustat; G: enarodustat.



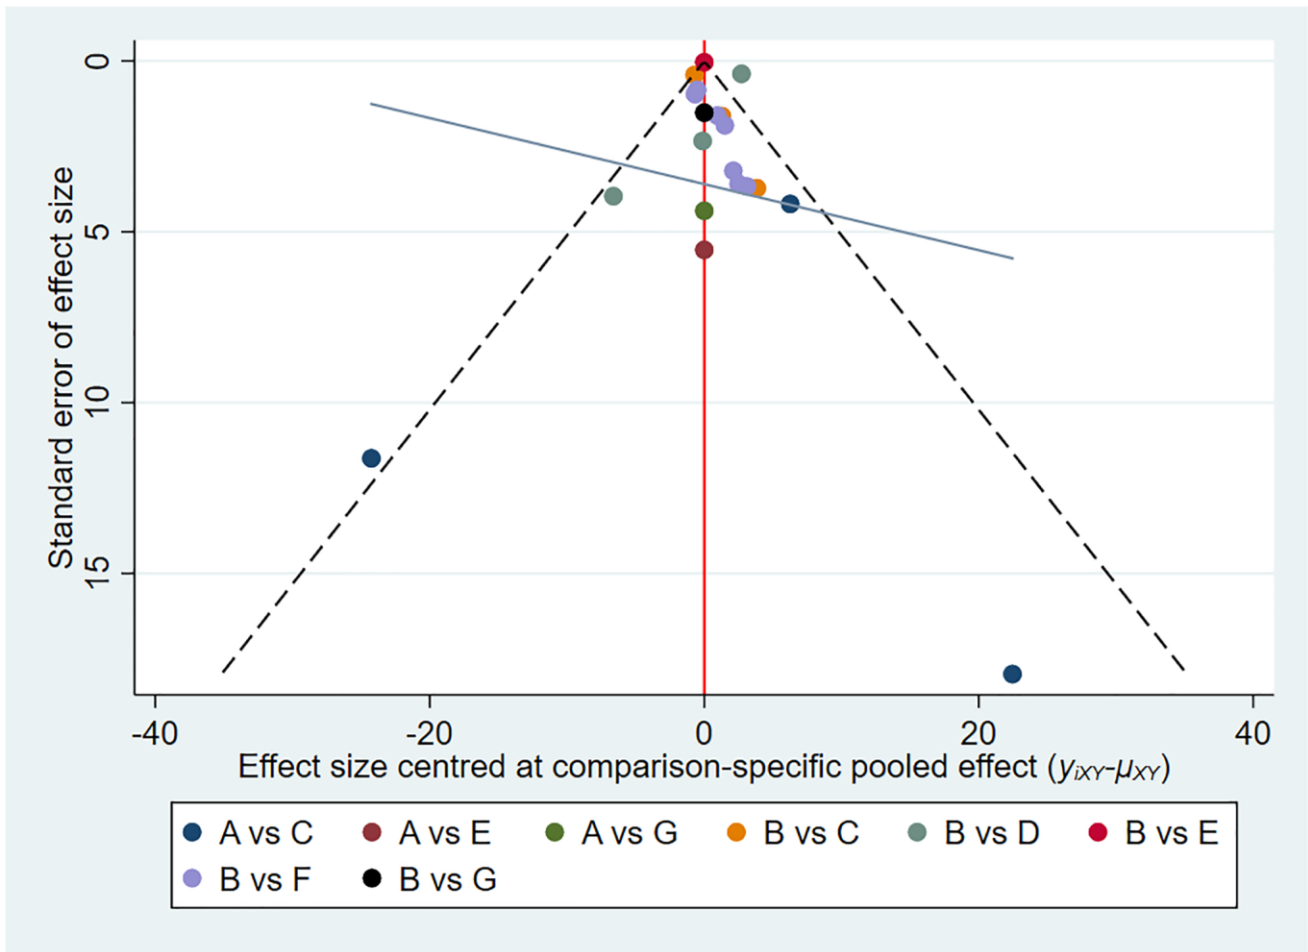

**Supplementary Figure 19. Funnel plot evaluating TSAT.** Abbreviations: A: placebo/control; B: ESAs; C: daprodustat; D: molidustat; E: vadadustat; F: roxadustat; G: enarodustat.

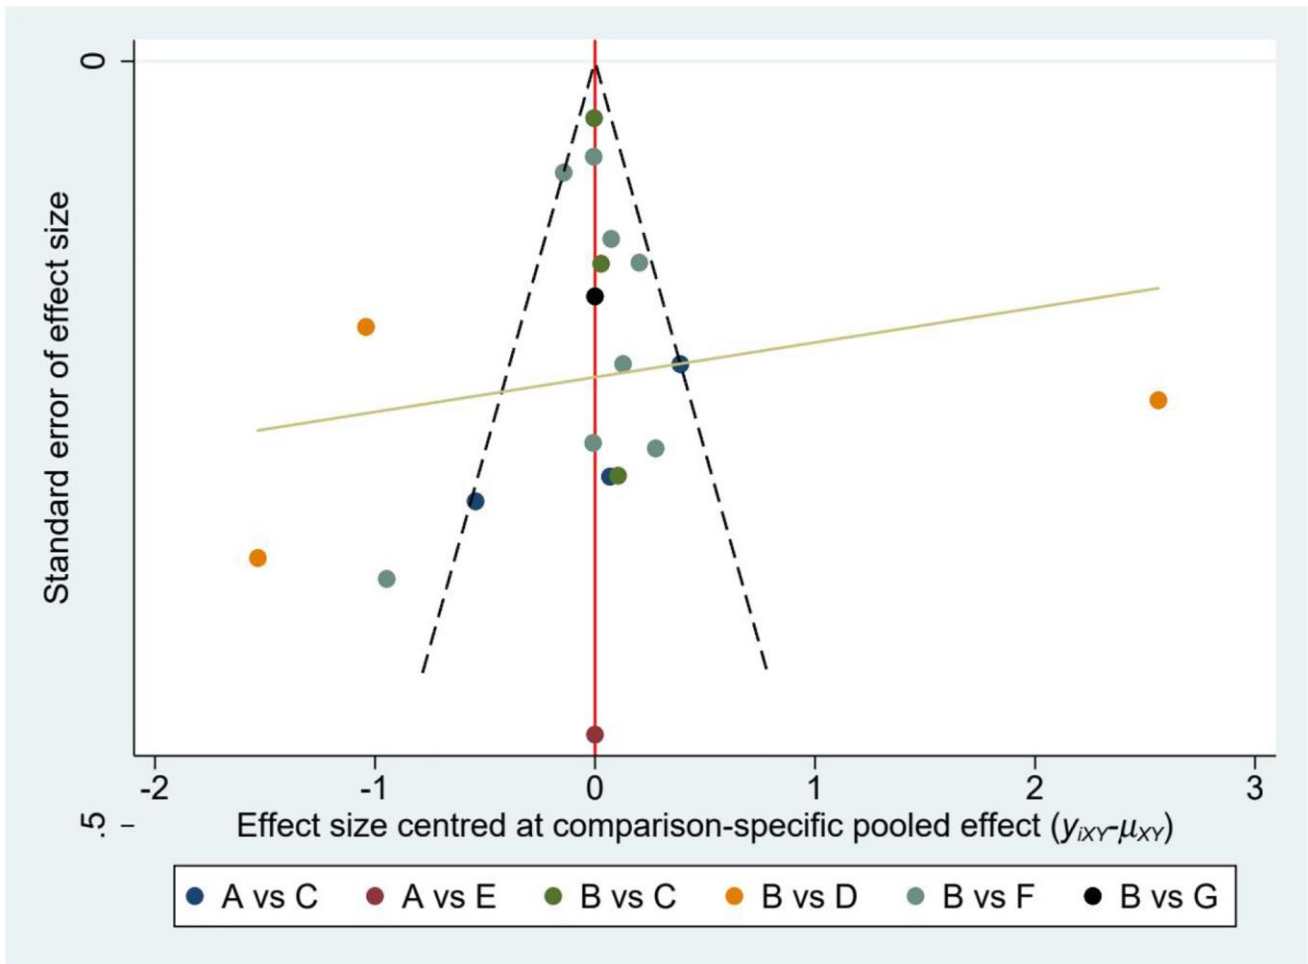

**Supplementary Figure 20. Funnel plot evaluating serum iron.** Abbreviations: A: placebo/control; B: ESAs; C: daprodustat; D: molidustat; E: vadadustat; F: roxadustat; G: enarodustat.

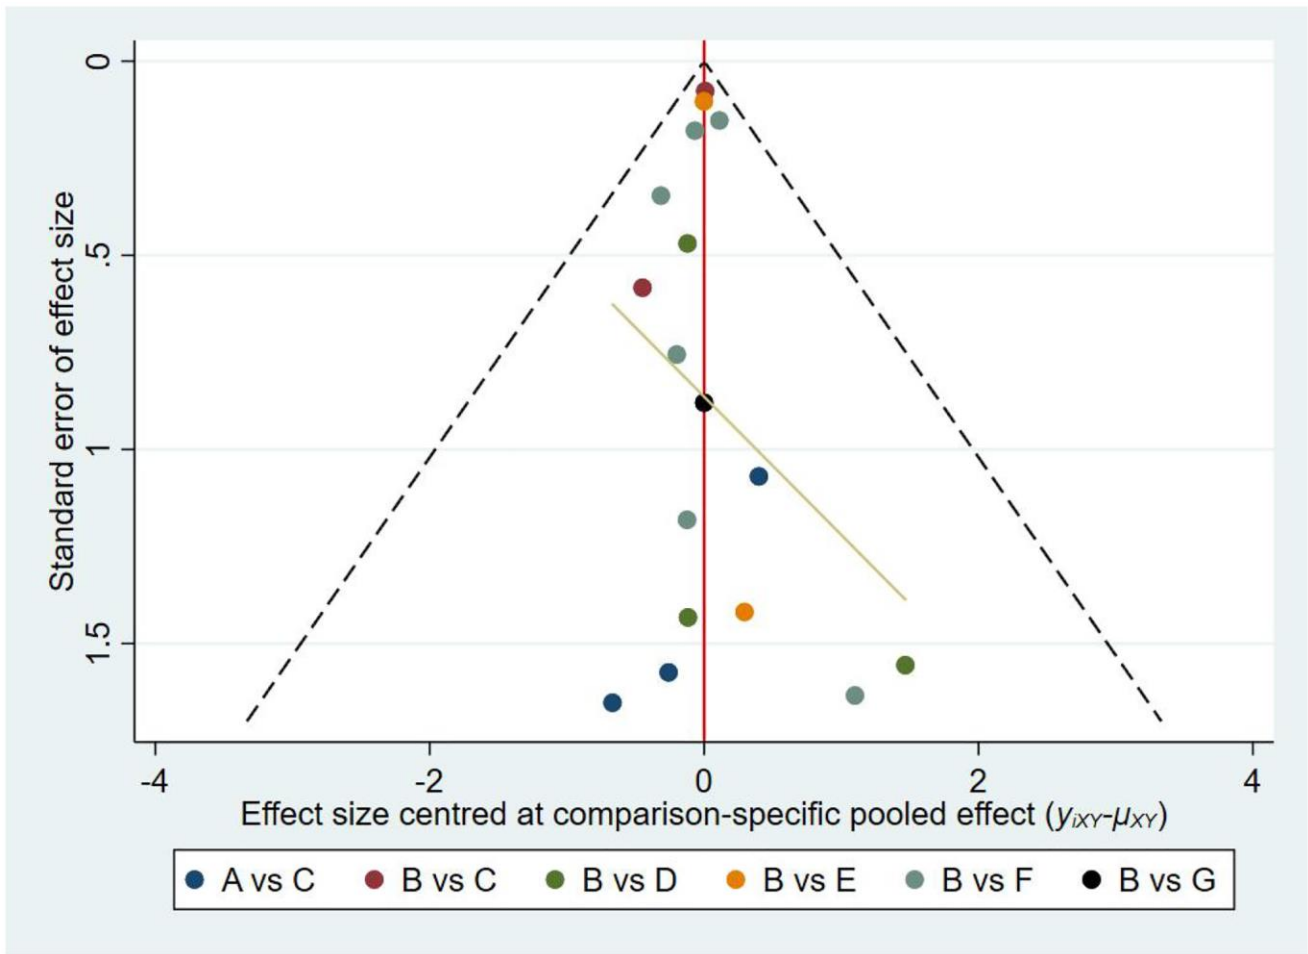

**Supplementary Figure 21. Funnel plot evaluating hypertension.** Abbreviations: A: placebo/control; B: ESAs; C: daprodustat; D: molidustat; E: vadadustat; F: roxadustat; G: enarodustat.

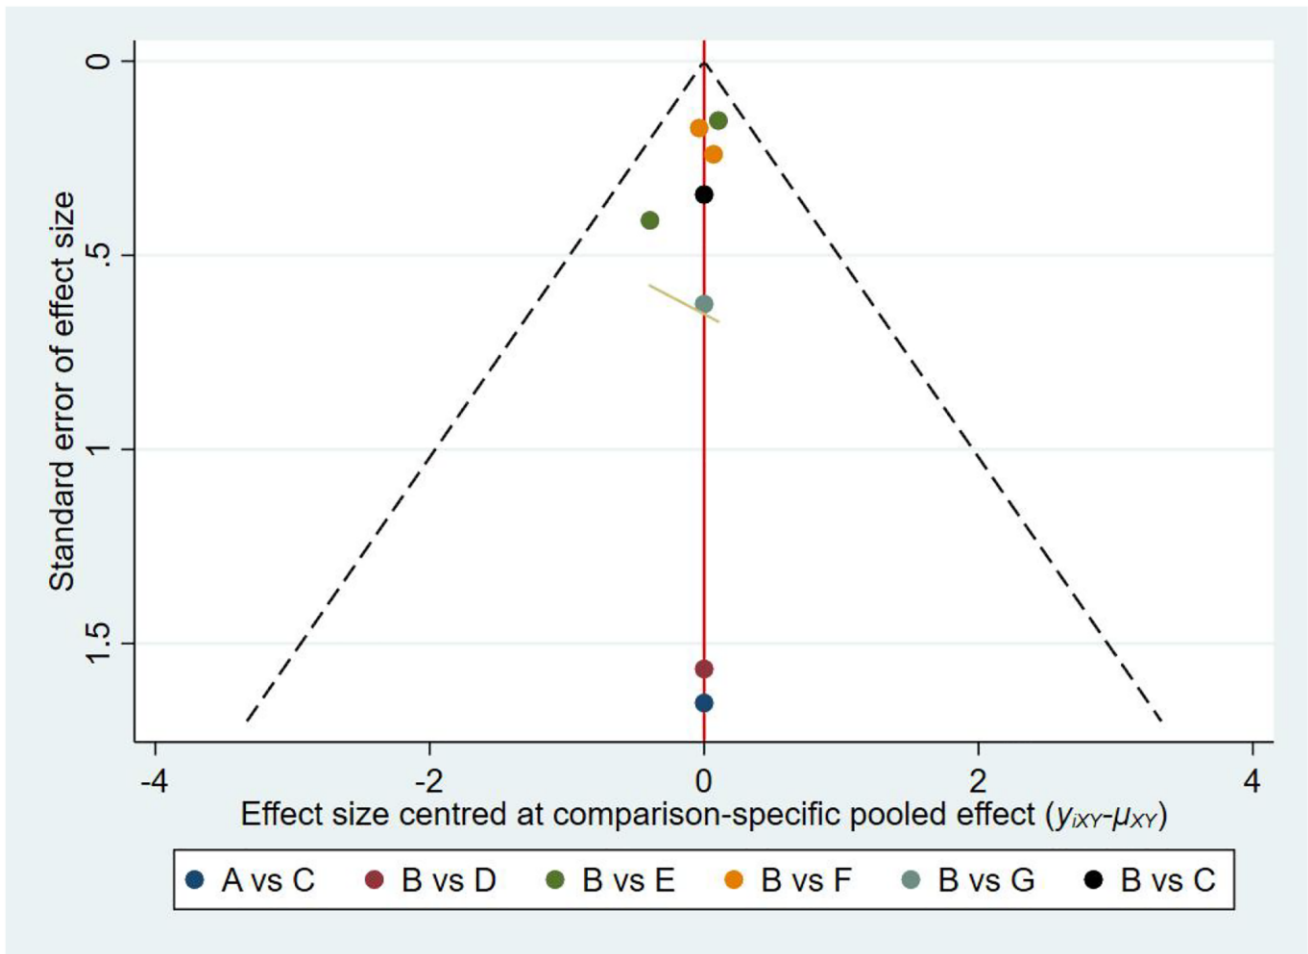

**Supplementary Figure 22. Funnel plot evaluating thrombosis.** Abbreviations: A: placebo/control; B: ESAs; C: daprodustat; D: molidustat; E: vadadustat; F: roxadustat; G: enarodustat.

## Supplementary Tables

Please browse Full Text version to see the data of Supplementary Table 1.

### Supplementary Table 1. Baseline characteristics of the study populations.

### Supplementary Table 2. Node-splitting approach for inconsistency assessment of all comparisons.

| Side    | Direct |      | Indirect |       | Difference |       | P    |
|---------|--------|------|----------|-------|------------|-------|------|
|         | Coef   | Std  | Coef     | Std   | Coef       | Std   |      |
| A vs. C | 1.07   | 0.21 | 1.54     | 0.34  | -0.48      | 0.39  | 0.23 |
| A vs. E | 1.54   | 0.28 | 0.94     | 0.31  | 0.59       | 0.41  | 0.15 |
| A vs. G | 1.51   | 0.49 | 1.62     | 0.39  | -0.11      | 0.62  | 0.86 |
| B vs. C | -0.06  | 0.17 | -0.54    | 0.36  | 0.48       | 0.39  | 0.23 |
| B vs. D | -0.05  | 0.20 | -2.68    | 314.9 | 2.62       | 314.9 | 0.99 |
| B vs. E | -0.20  | 0.20 | 0.39     | 0.36  | -0.59      | 0.41  | 0.15 |
| B vs. F | 0.32   | 0.11 | -2.76    | 111.1 | 3.08       | 111.1 | 0.98 |
| B vs. G | 0.27   | 0.32 | 0.16     | 0.54  | 0.11       | 0.86  | 0.86 |

Abbreviations: Coef: coefficient; Std: standard deviation; A: placebo/control; B: ESAs; C: daprodustat; D: molidustat; E: vadadustat; F: roxadustat; G: enarodustat.

### Supplementary Table 3. Ranking probabilities, mean ranks, and SUCRA values.

|            | placebo | ESAs | daprodustat | molidustat | vadadustat | roxadustat | enarodustat |
|------------|---------|------|-------------|------------|------------|------------|-------------|
| Hemoglobin |         |      |             |            |            |            |             |
| Best       | 0       | 0    | 0.2         | 3.1        | 1.7        | 57.4       | 37.5        |
| 2nd        | 0       | 7.1  | 2.6         | 11.3       | 8.7        | 36.9       | 33.4        |
| 3rd        | 0       | 33   | 9.1         | 20.7       | 20.1       | 5.1        | 12          |
| SUCRA      | 0       | 53.9 | 33.7        | 46.4       | 44.8       | 91.8       | 79.4        |
| PrBest     | 0       | 0    | 0.2         | 3.1        | 1.7        | 57.4       | 37.5        |
| Mean Rank  | 7       | 3.8  | 5           | 4.2        | 4.3        | 1.5        | 2.2         |
| Ferritin   |         |      |             |            |            |            |             |
| Best       | 0       | 0.3  | 10          | 6          | 11.5       | 63.9       | 8.3         |
| 2nd        | 0.1     | 13.6 | 23.6        | 11.6       | 15.7       | 22.8       | 12.6        |
| 3rd        | 0.6     | 30.4 | 21.9        | 10.9       | 14.2       | 9.2        | 12.8        |
| SUCRA      | 6.5     | 54.7 | 60.9        | 40.3       | 51.0       | 90.9       | 45.8        |
| PrBest     | 0       | 0.3  | 10.0        | 6.0        | 11.5       | 63.9       | 8.3         |
| Mean Rank  | 6.6     | 3.7  | 3.3         | 4.6        | 3.9        | 1.5        | 4.3         |
| Hepcidin   |         |      |             |            |            |            |             |
| Best       | 0       | 0    | 18.9        | 2.1        | 10.6       | 23.5       | 44.9        |
| 2nd        | 0       | 0.1  | 26          | 6.0        | 15.8       | 28.5       | 23.5        |
| 3rd        | 0       | 2.8  | 25.4        | 11.3       | 21.5       | 24.4       | 14.7        |
| SUCRA      | 1.7     | 29.8 | 69.6        | 37.9       | 56.2       | 74         | 80.9        |
| PrBest     | 0       | 0    | 18.9        | 2.1        | 10.6       | 23.5       | 44.9        |
| Mean Rank  | 6.9     | 5.2  | 2.8         | 4.7        | 3.6        | 2.6        | 2.1         |
| TSAT       |         |      |             |            |            |            |             |
| Best       | 0       | 17.2 | 6.1         | 0          | 0.5        | 6.7        | 69.5        |
| 2nd        | 0       | 55.5 | 13.2        | 0.3        | 2.4        | 17.8       | 10.8        |
| 3rd        | 0       | 21.8 | 22.1        | 2.2        | 8.5        | 37.3       | 8.1         |

|              |      |      |      |      |      |      |      |
|--------------|------|------|------|------|------|------|------|
| SUCRA        | 0    | 80.7 | 56.3 | 20.6 | 39.9 | 63.7 | 88.7 |
| PrBest       | 0    | 17.2 | 6.1  | 0    | 0.5  | 6.7  | 69.5 |
| Mean Rank    | 7.0  | 2.2  | 3.6  | 5.8  | 4.6  | 3.2  | 1.7  |
| TIBC         |      |      |      |      |      |      |      |
| Best         | 0    | 0    | 0    | 0    | 92.6 | 0    | 7.3  |
| 2nd          | 0    | 0    | 7.7  | 3.1  | 7.3  | 3.1  | 78.7 |
| 3rd          | 0.4  | 0    | 50.7 | 15.3 | 0.1  | 24.6 | 8.8  |
| SUCRA        | 12.2 | 14.0 | 58.1 | 37.3 | 98.7 | 48.7 | 80.9 |
| PrBest       | 0    | 0    | 0    | 0    | 92.6 | 0    | 7.3  |
| Mean Rank    | 6.3  | 6.2  | 3.5  | 4.8  | 1.1  | 4.1  | 2.1  |
| Serum iron   |      |      |      |      |      |      |      |
| Best         | 5.6  | 27.2 | 4.7  | 0.9  | 25.6 | 11.7 | 24.3 |
| 2nd          | 11.2 | 36.3 | 8.8  | 2.0  | 8.5  | 22.7 | 10.5 |
| 3rd          | 11.2 | 21.0 | 19.1 | 5.7  | 7.5  | 23.1 | 12.4 |
| SUCRA        | 41.0 | 78.3 | 48.0 | 20.5 | 48.0 | 61.3 | 52.9 |
| PrBest       | 5.6  | 27.2 | 4.7  | 0.9  | 25.6 | 11.7 | 24.3 |
| Mean Rank    | 4.5  | 2.3  | 4.1  | 5.8  | 4.1  | 3.3  | 3.8  |
| Hypertension |      |      |      |      |      |      |      |
| Best         | 36.8 | 0    | 0.1  | 45   | 12.4 | 0.2  | 5.6  |
| 2nd          | 17.4 | 0.4  | 3.1  | 29.9 | 42.3 | 1.7  | 5.2  |
| 3rd          | 9.1  | 5.7  | 20.4 | 10.6 | 38   | 11.1 | 5.1  |
| SUCRA        | 63.3 | 33.2 | 45.6 | 80.7 | 76.5 | 33.9 | 16.9 |
| PrBest       | 36.8 | 0    | 0.1  | 45   | 12.4 | 0.2  | 5.6  |
| Mean Rank    | 3.2  | 5.0  | 4.3  | 2.2  | 2.4  | 5.0  | 6.0  |
| Thrombosis   |      |      |      |      |      |      |      |
| Best         | 1.0  | 43.6 | 0.2  | 23.5 | 1.7  | 0.0  | 30.0 |
| 2nd          | 0.7  | 44.4 | 1.0  | 5.8  | 26.3 | 3.8  | 18.0 |
| 3rd          | 0.7  | 11.4 | 3.4  | 5.2  | 43.4 | 22.4 | 13.5 |
| SUCRA        | 4.6  | 88.5 | 29.6 | 44.2 | 65.9 | 49.3 | 67.9 |
| PrBest       | 1.0  | 43.6 | 0.2  | 23.5 | 1.7  | 0.0  | 30.0 |
| Mean Rank    | 6.7  | 1.7  | 5.2  | 4.4  | 3.0  | 4.0  | 2.9  |

Abbreviations: SUCRA: surface under the cumulative ranking curve; ESAs: erythropoiesis-stimulating agents; TSAT: transferrin saturation; TIBC: total iron-binding capacity.
