# Supplementary material for: A network meta-analysis of the efficacy of hypoxia-inducible factor prolyl-hydroxylase inhibitors in dialysis chronic kidney disease
Source: publisher site journal article supplement (doi:10.18632/aging.204611), 2023-03-27
Supplement: Supplementary file [file aging-v15i6-204611-supplementary-material-SD1.pdf]

**SUPPLEMENTARY FIGURES**

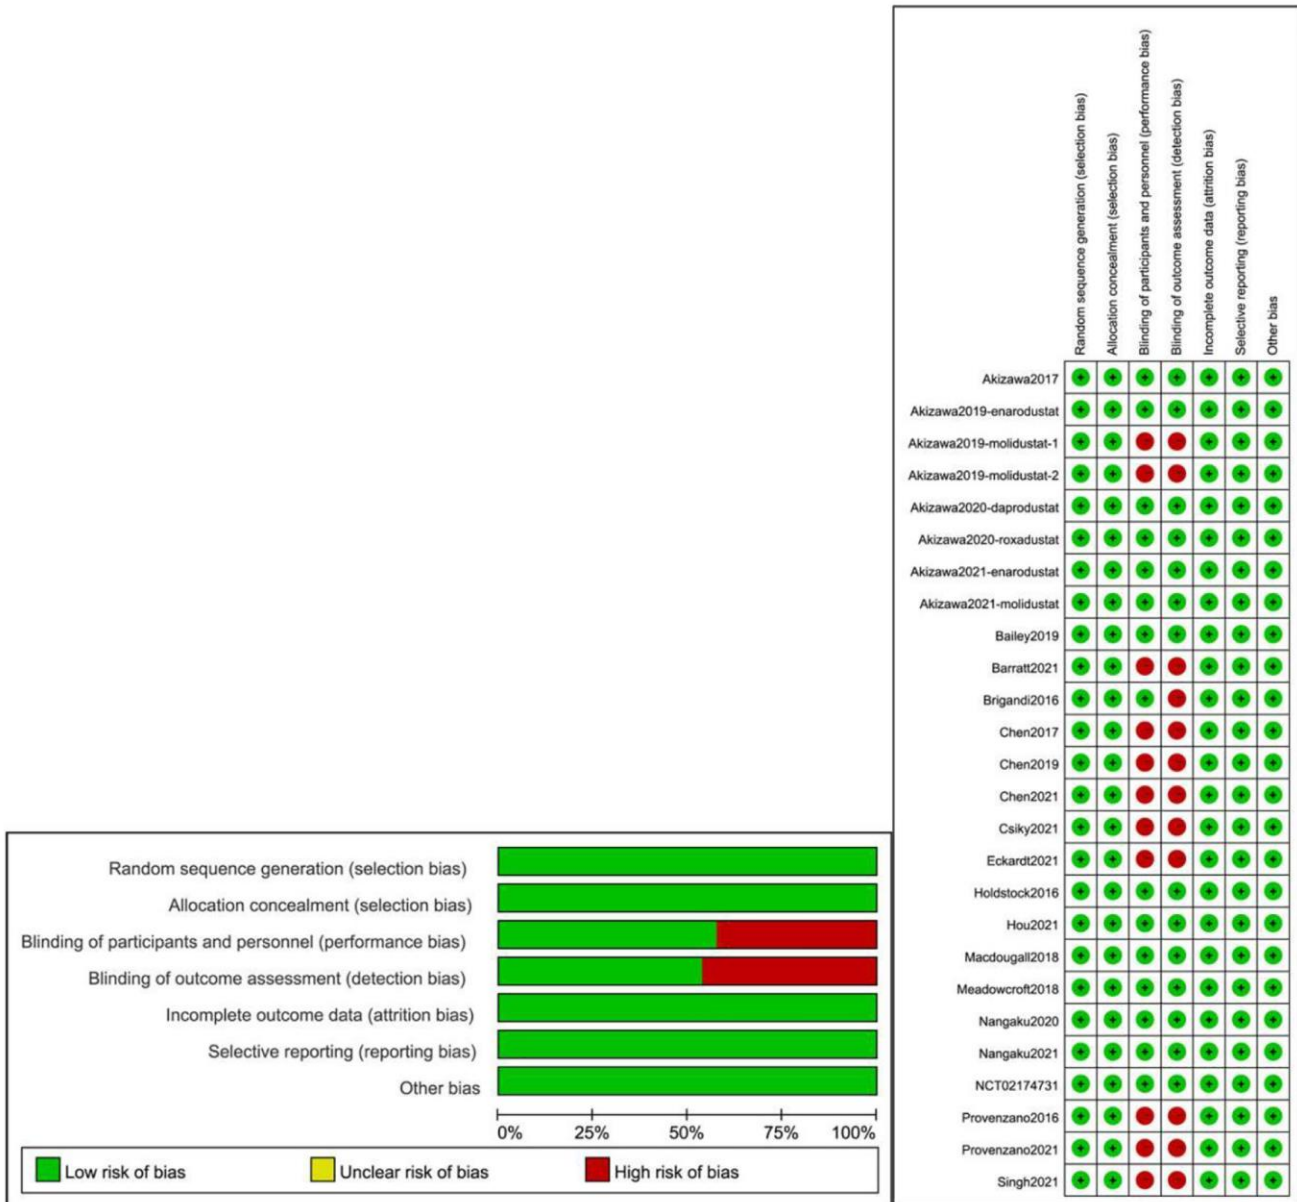

**Supplementary Figure 1. Bias assessment.** The Cochrane risk-of-bias tool assessed the risk of bias in included studies.

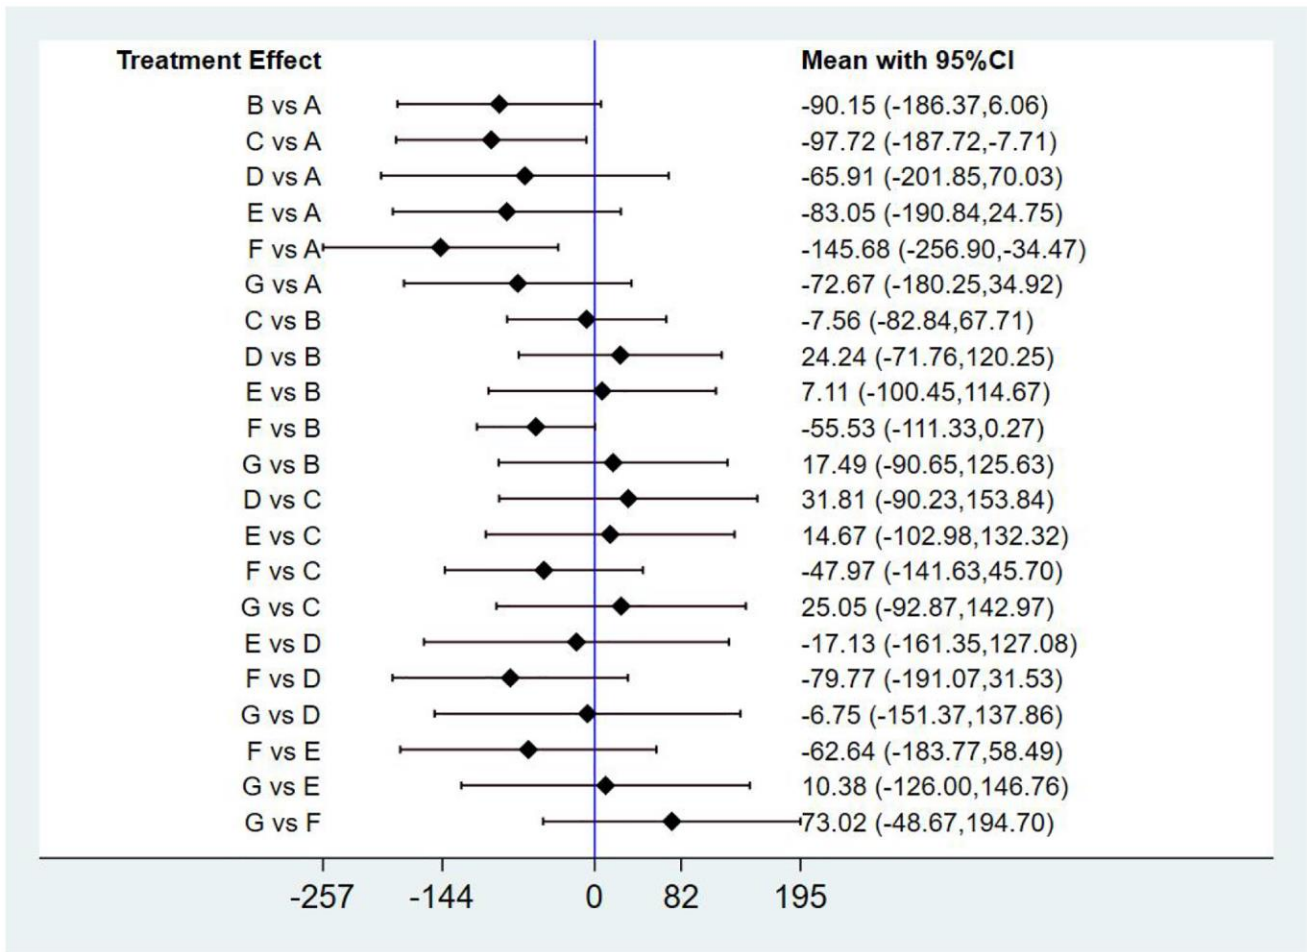

**Supplementary Figure 2. Forest plot of ferritin.** Abbreviations: A: placebo/control; B: ESAs; C: daprodustat; D: molidustat; E: vadadustat; F: roxadustat; G: enarodustat.

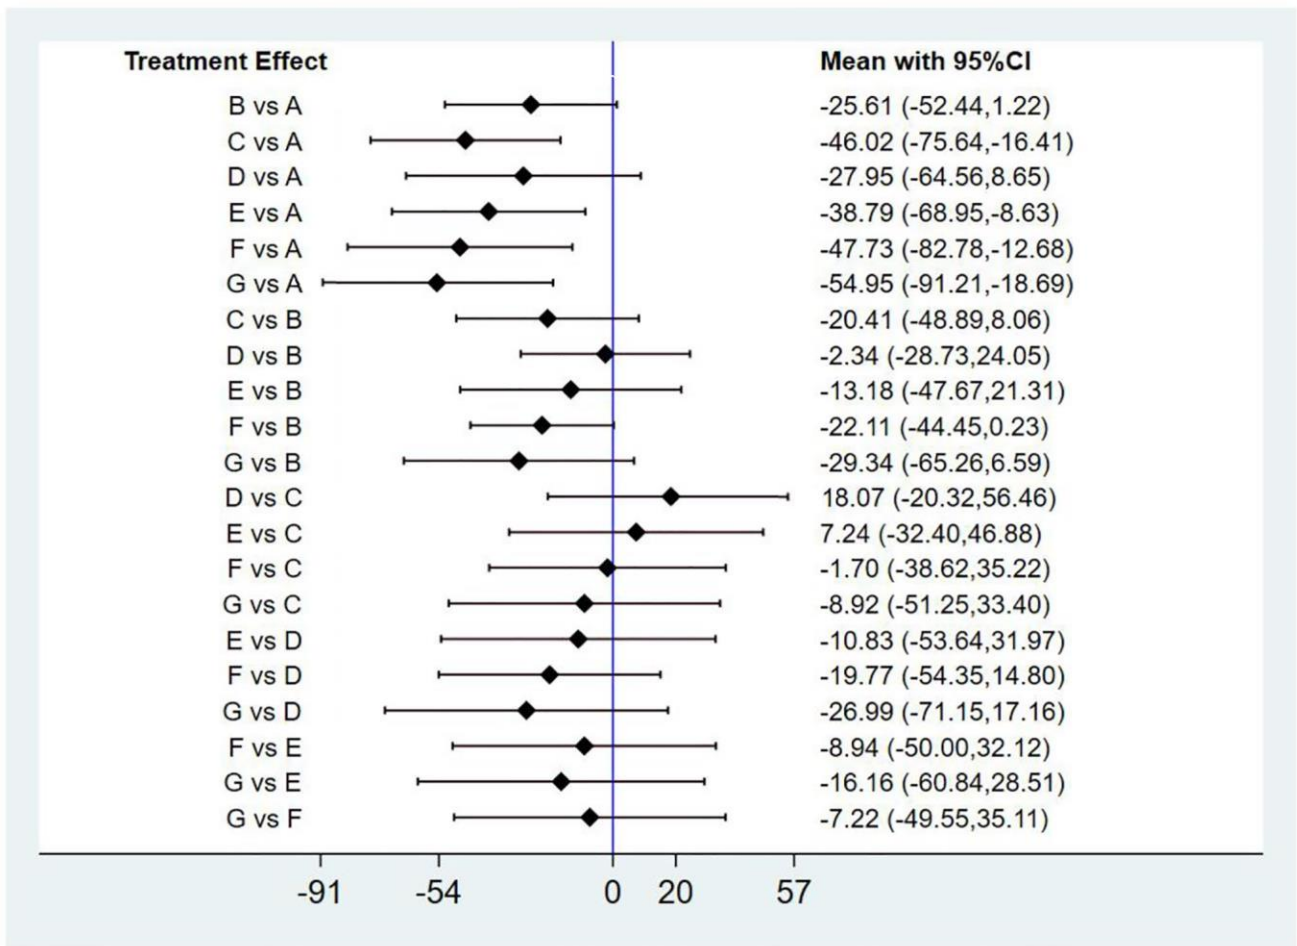

**Supplementary Figure 3. Forest plots of hepcidin.** Abbreviations: A: placebo/control; B: ESAs; C: daprodustat; D: molidustat; E: vadadustat; F: roxadustat; G: enarodustat.

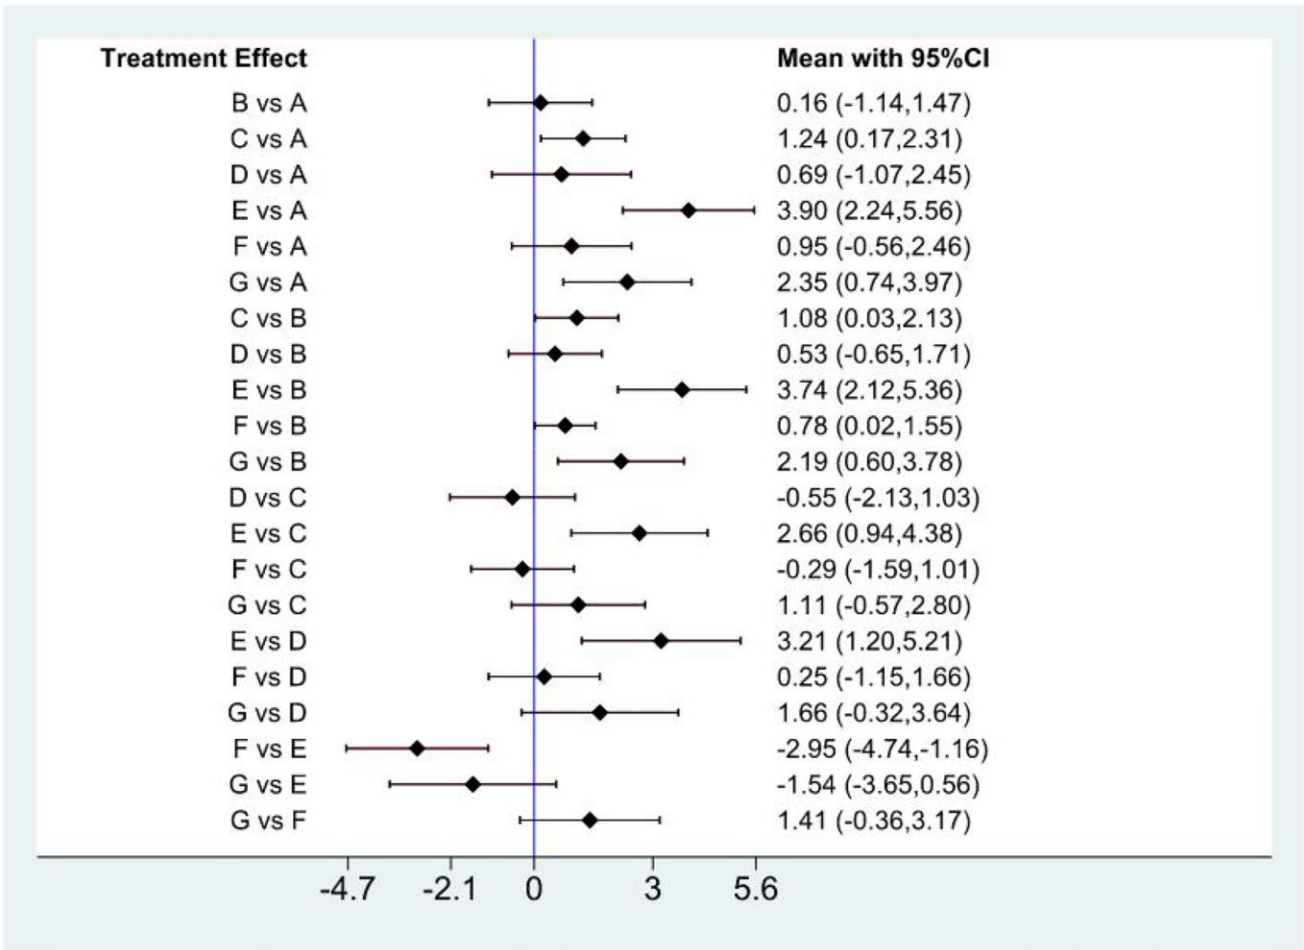

**Supplementary Figure 4. Forest plots of TIBC.** Abbreviations: A: placebo/control; B: ESAs; C: daprodustat; D: molidustat; E: vadadustat; F: roxadustat; G: enarodustat.

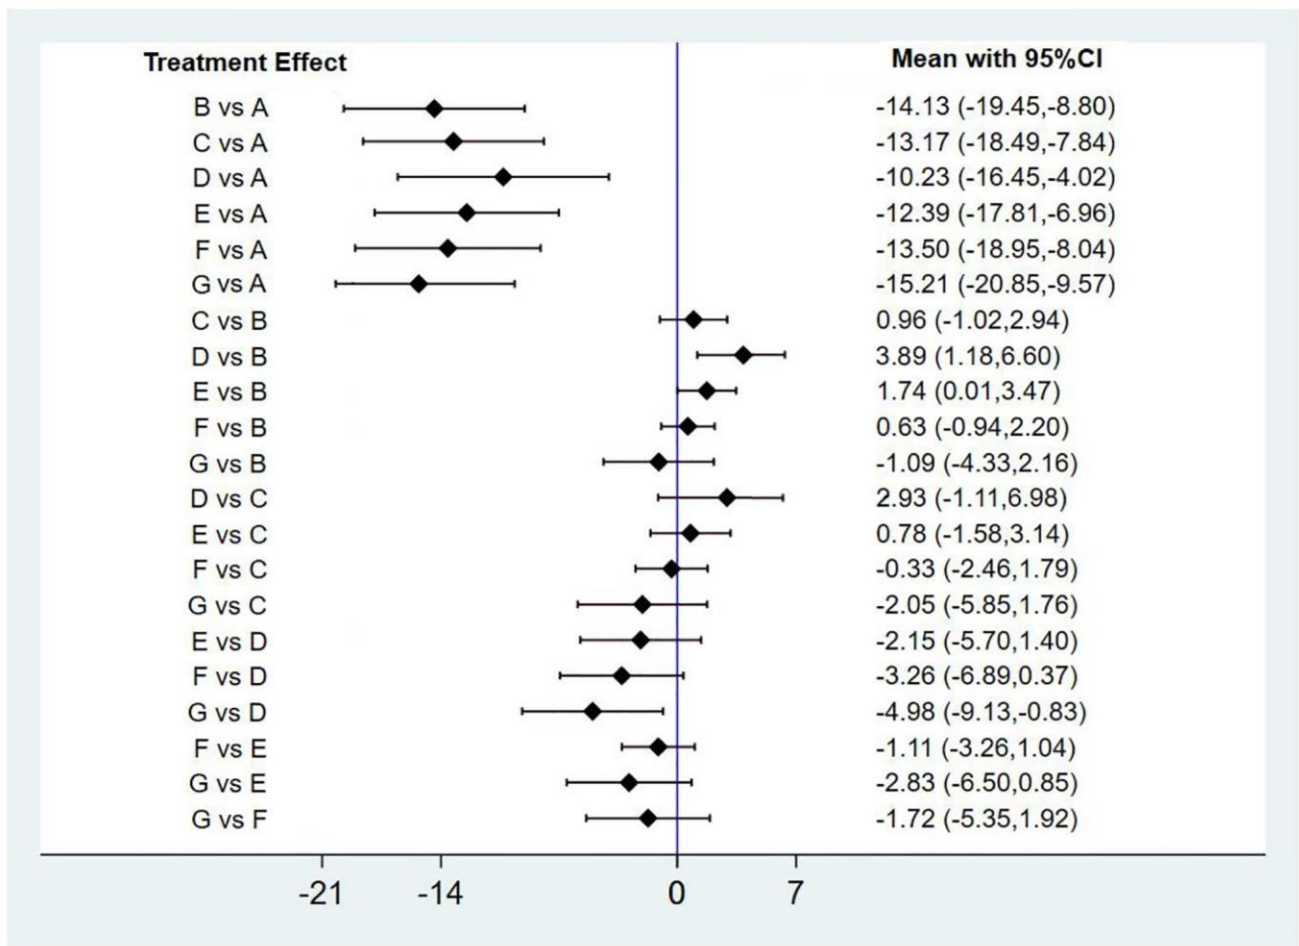

**Supplementary Figure 5. Forest plots of TSAT.** Abbreviations: A: placebo/control; B: ESAs; C: daprodustat; D: molidustat; E: vadadustat; F: roxadustat; G: enarodustat.

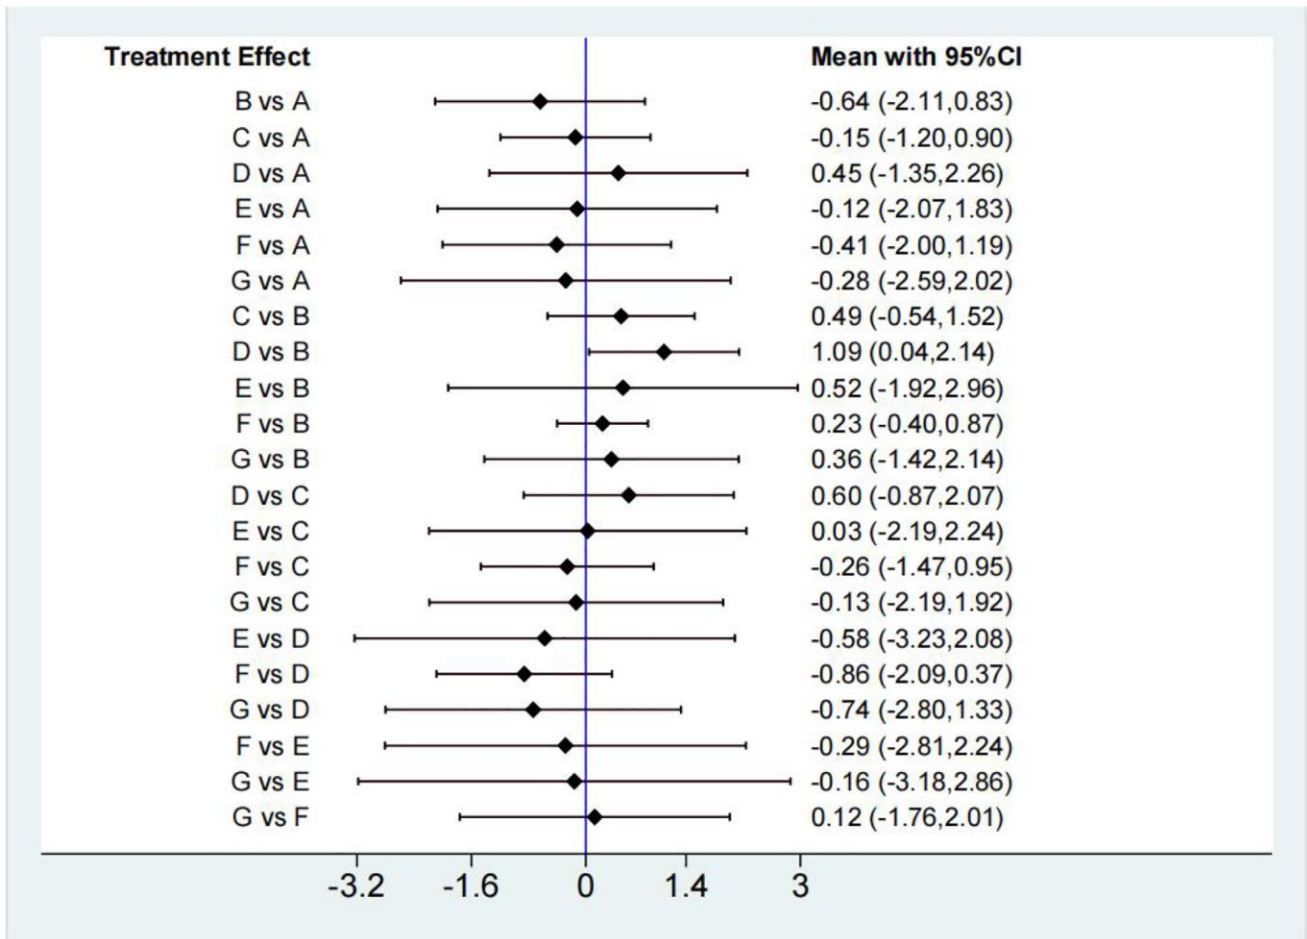

**Supplementary Figure 6. Forest plots of serum iron.** Abbreviations: A: placebo/control; B: ESAs; C: daprodustat; D: molidustat; E: vadadustat; F: roxadustat; G: enarodustat.

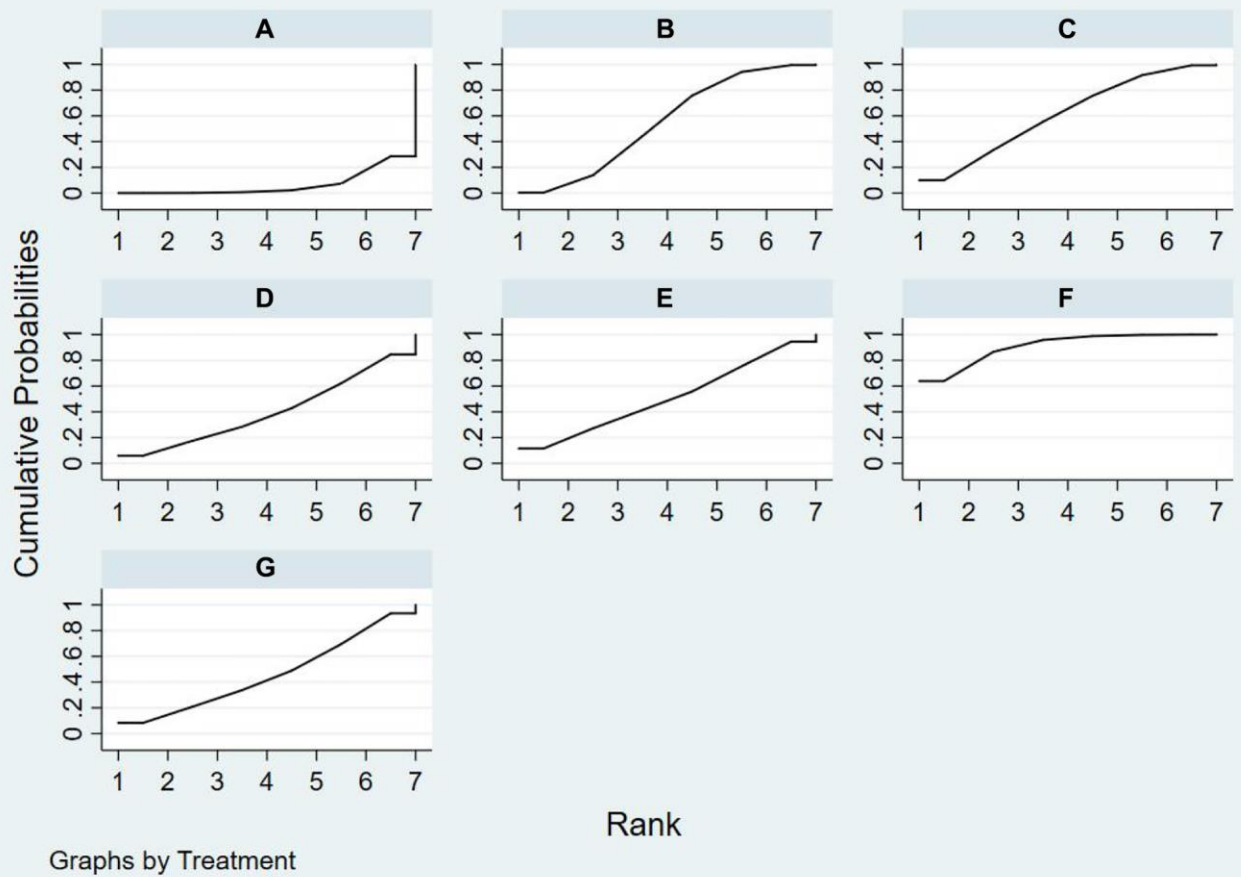

**Supplementary Figure 7. The surface under the cumulative ranking curve for ferritin. (A) Placebo/control; (B) ESAs; (C) daprodustat; (D) molidustat; (E) vadadustat; (F) roxadustat; (G) enarodustat.**



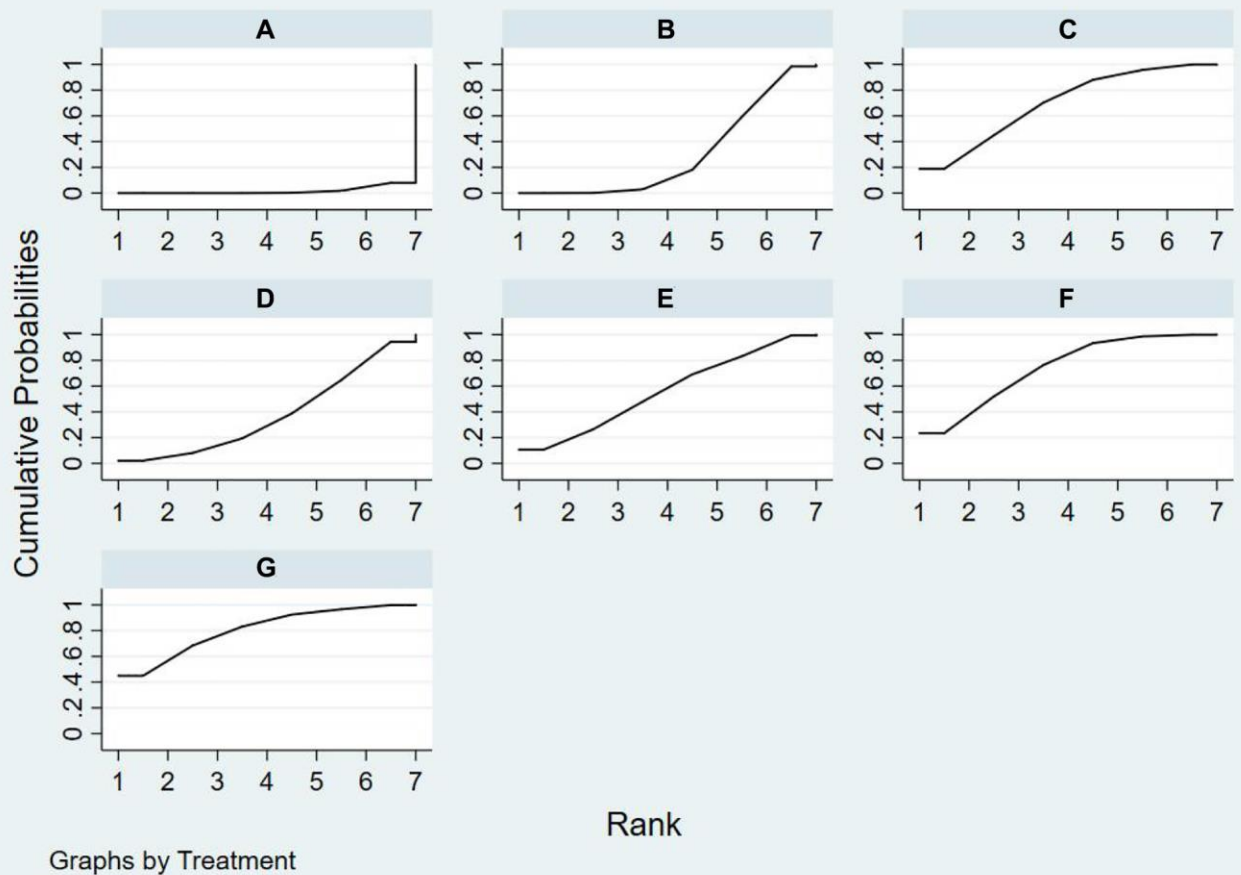

**Supplementary Figure 8. The surface under the cumulative ranking curve for hepcidin. (A) Placebo/control; (B) ESAs; (C) daprodustat; (D) molidustat; (E) vadadustat; (F) roxadustat; (G) enarodustat.**



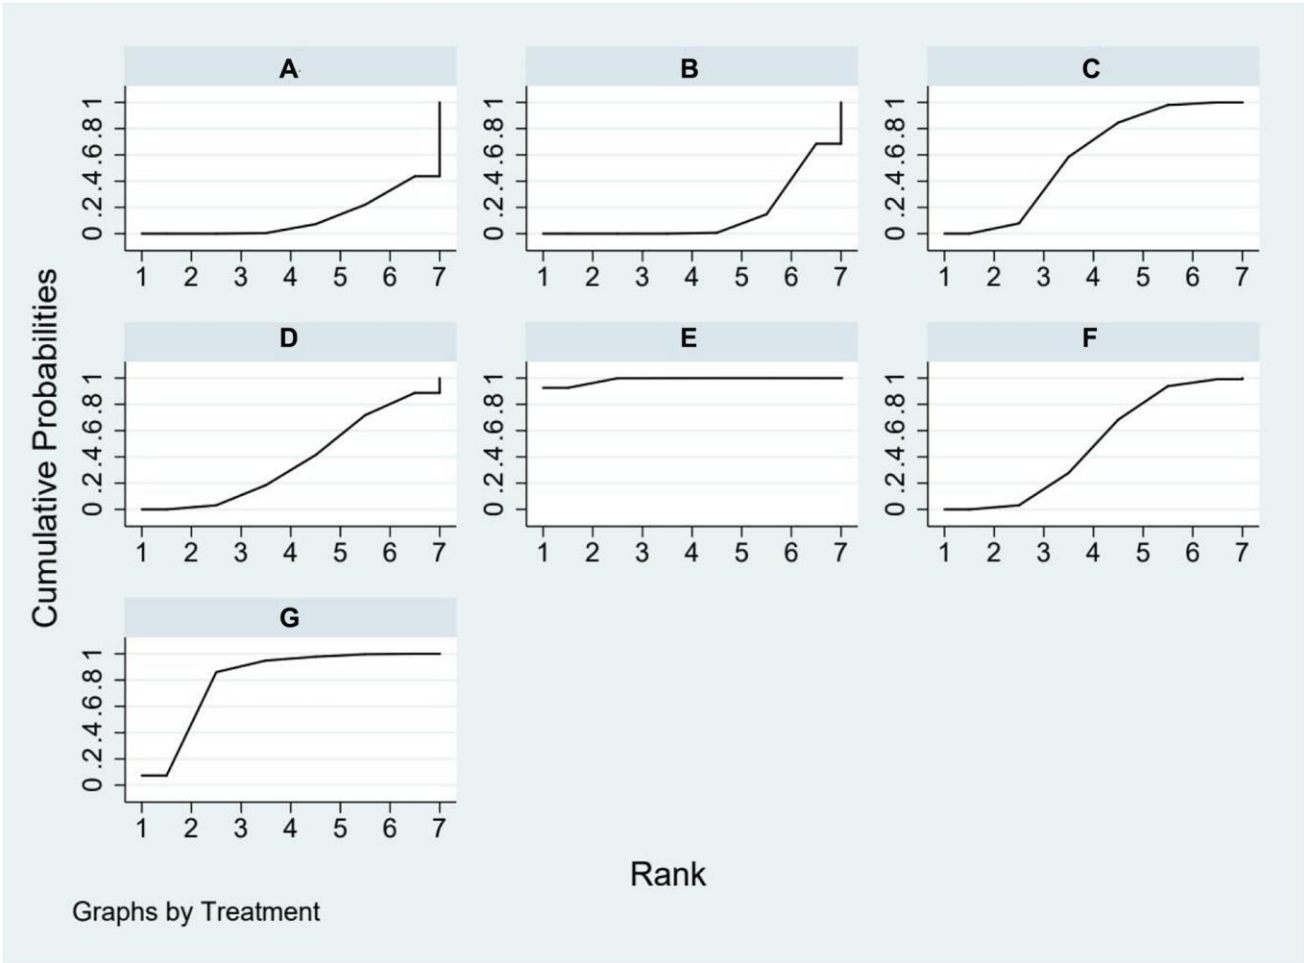

**Supplementary Figure 9. The surface under the cumulative ranking curve for TIBC. (A) Placebo/control; (B) ESAs; (C) daprodustat; (D) molidustat; (E) vadadustat; (F) roxadustat; (G) enarodustat.**

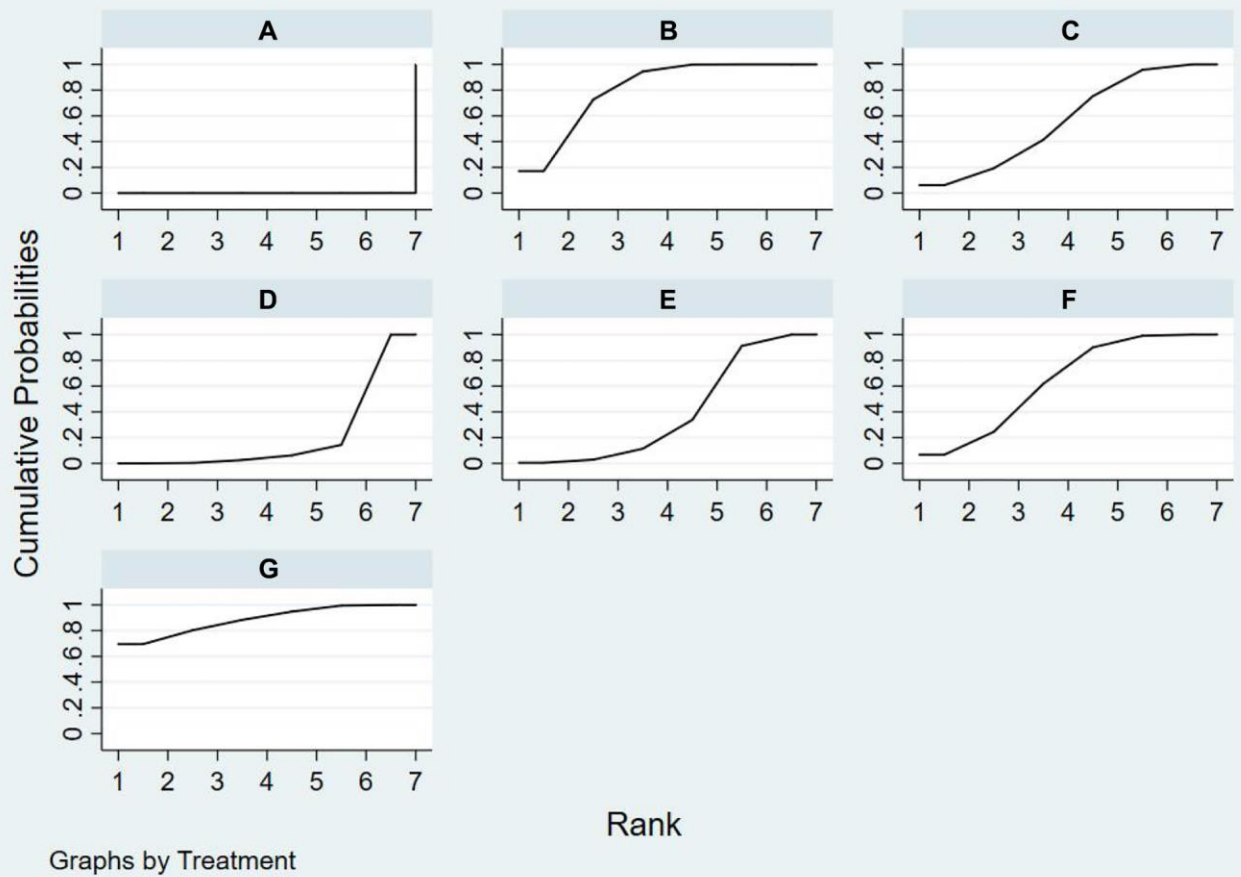

**Supplementary Figure 10. The surface under the cumulative ranking curve for TSAT. (A) Placebo/control; (B) ESAs; (C) daprodustat; (D) molidustat; (E) vadadustat; (F) roxadustat; (G) enarodustat.**

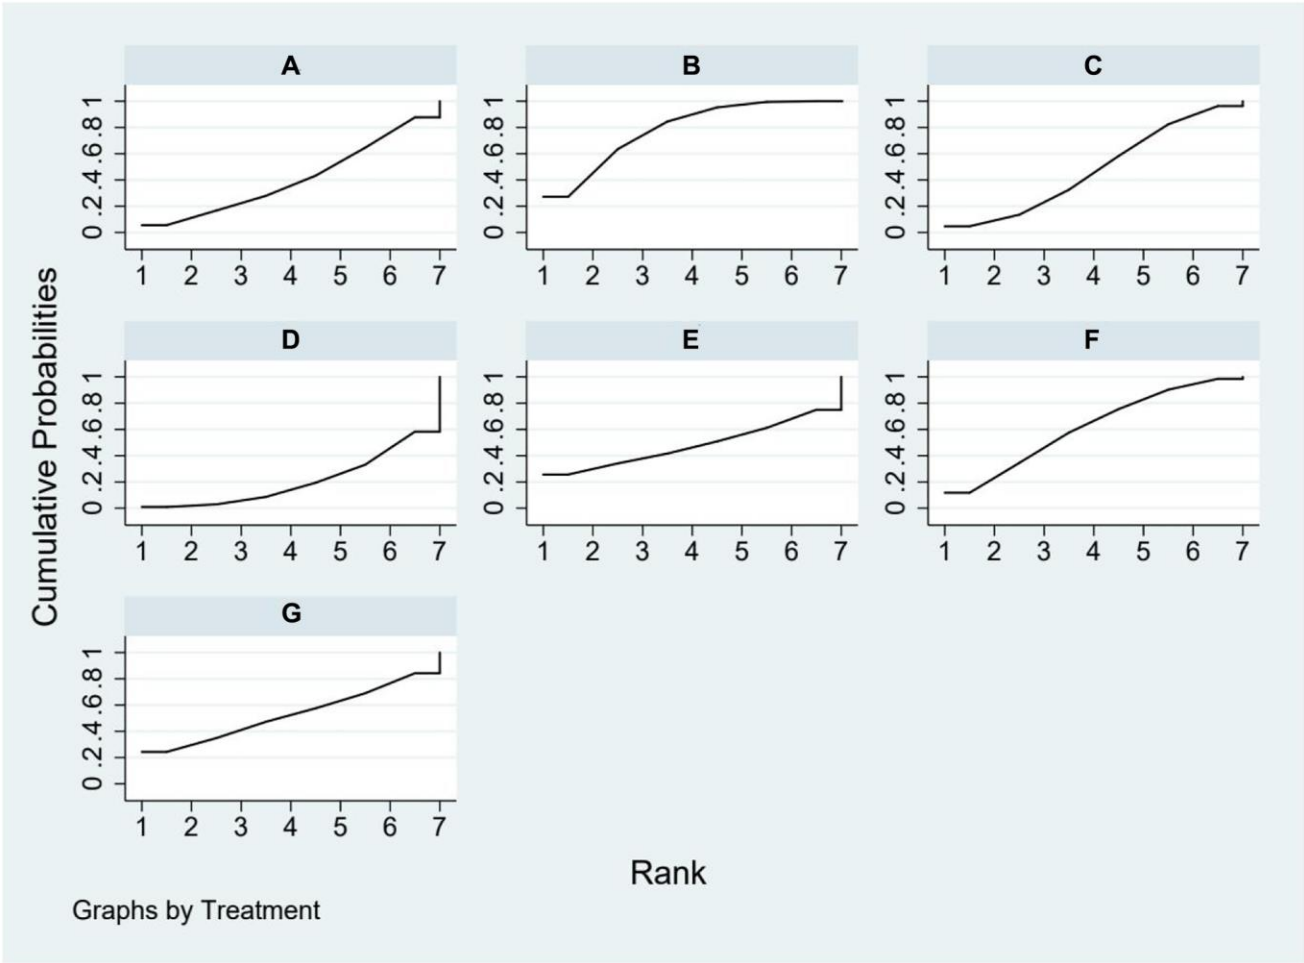

**Supplementary Figure 11. The surface under the cumulative ranking curve for serum iron. (A) Placebo/control; (B) ESAs; (C) daprodustat; (D) molidustat; (E) vadadustat; (F) roxadustat; (G) enarodustat.**

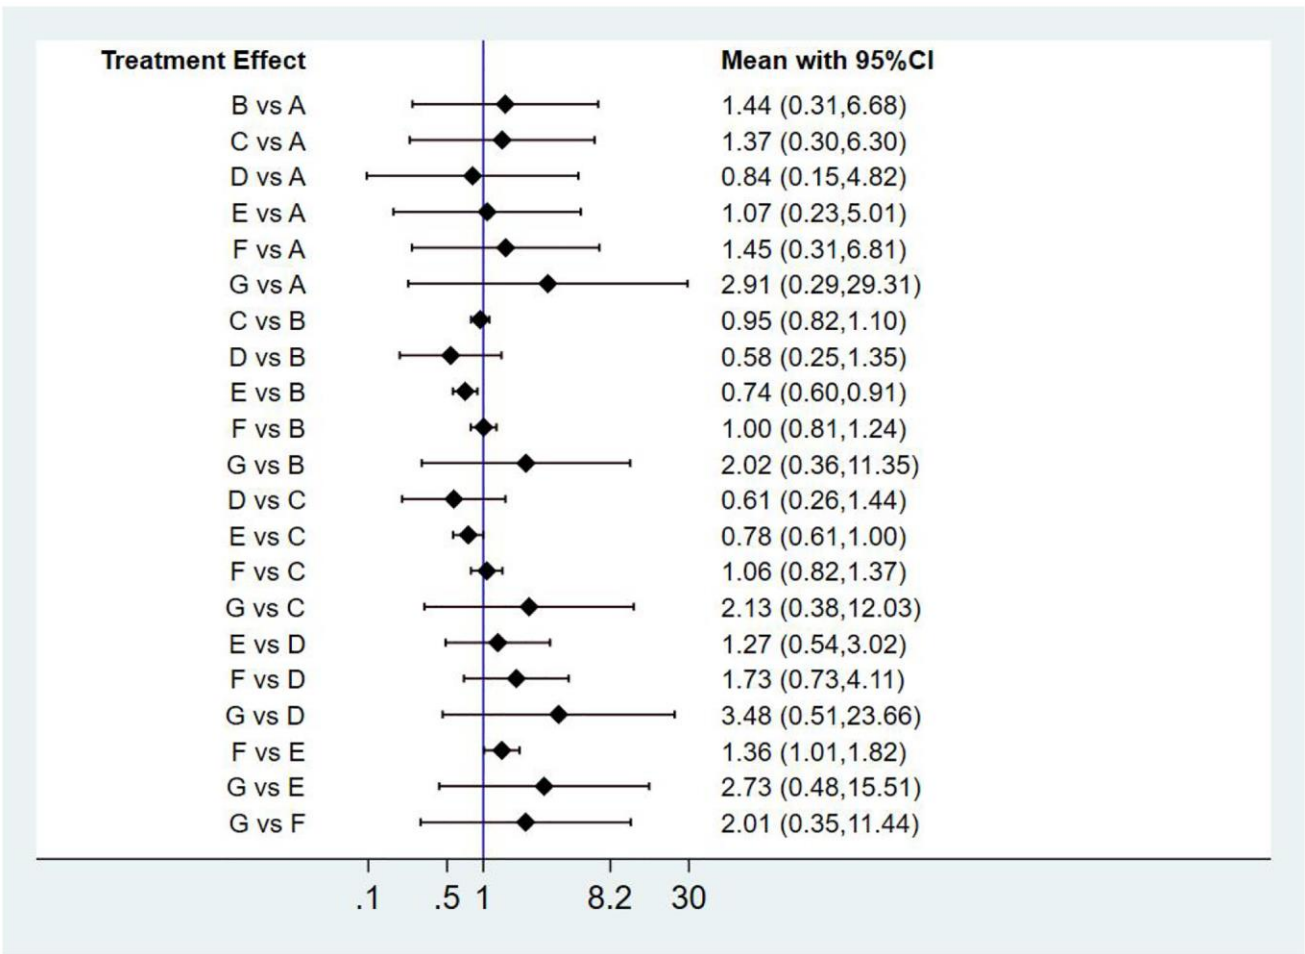

**Supplementary Figure 12. Forest plots of hypertension.** Abbreviations: A: placebo/control; B: ESAs; C: daprodustat; D: molidustat; E: vadadustat; F: roxadustat; G: enarodustat.

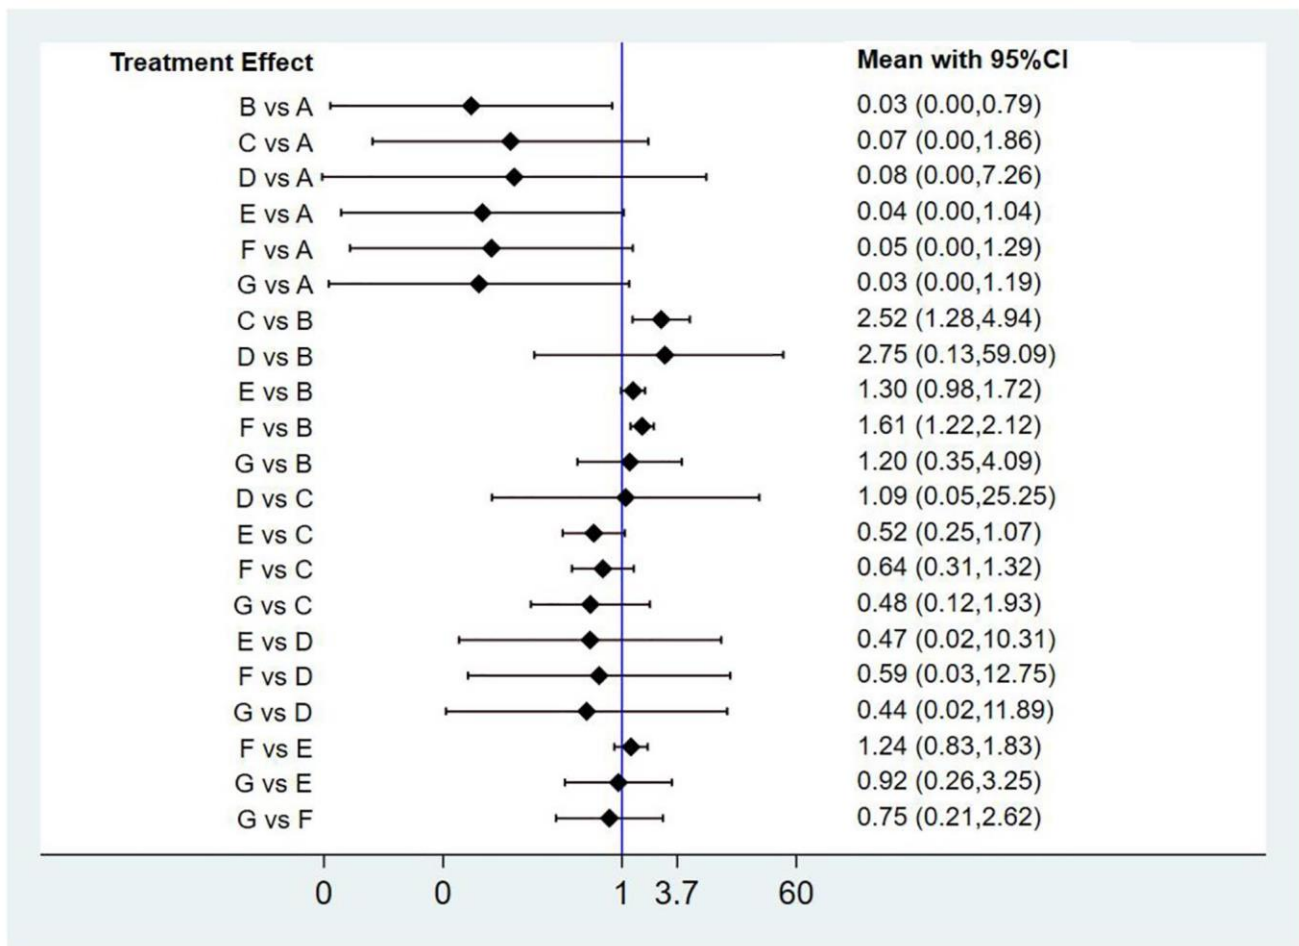

**Supplementary Figure 13. Forest plots of thrombosis.** Abbreviations: A: placebo/control; B: ESAs; C: daprodustat; D: molidustat; E: vadadustat; F: roxadustat; G: enarodustat.

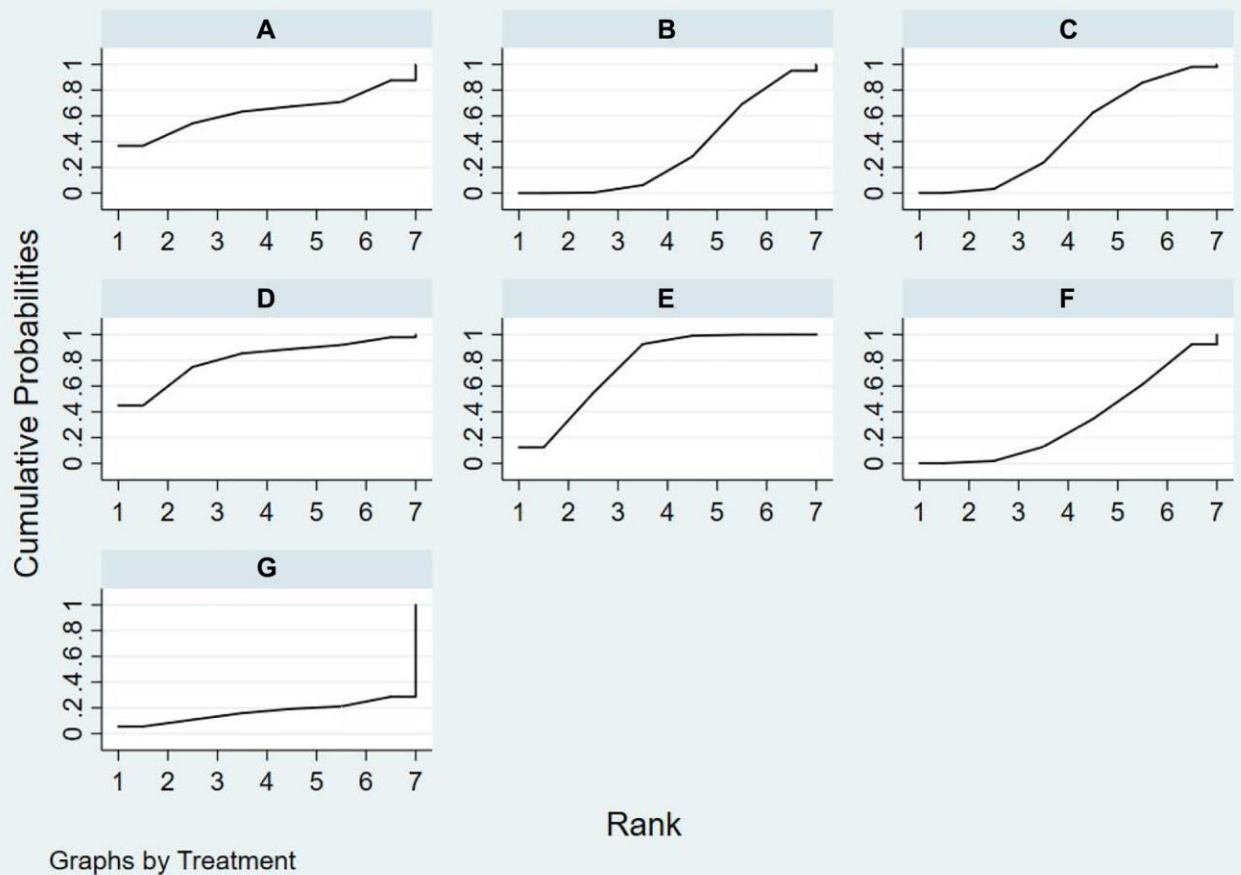

**Supplementary Figure 14. The surface under the cumulative ranking curve for hypertension. (A) Placebo/control; (B) ESAs; (C) daprodustat; (D) molidustat; (E) vadadustat; (F) roxadustat; (G) enarodustat.**

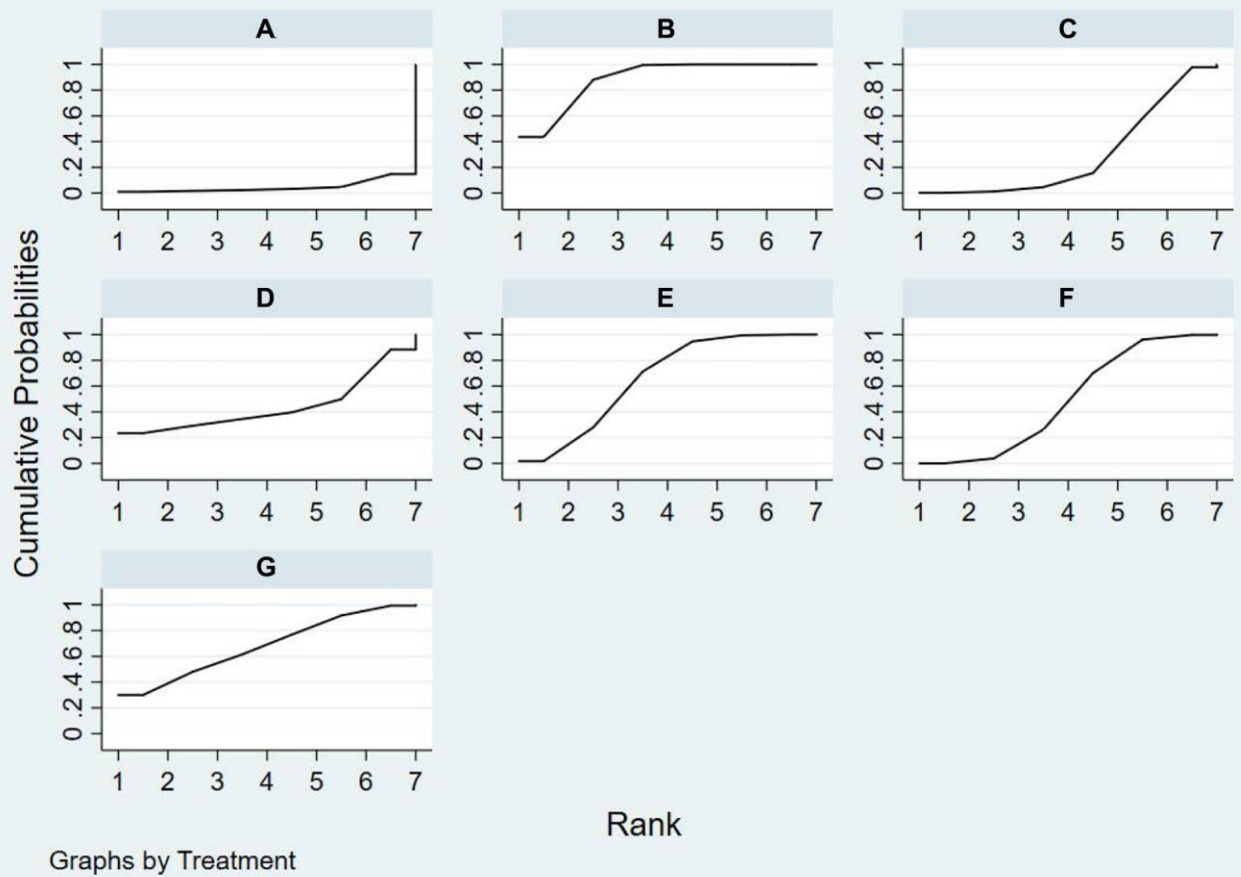

**Supplementary Figure 15. The surface under the cumulative ranking curve for thrombosis. (A) Placebo/control; (B) ESAs; (C) daprodustat; (D) molidustat; (E) vadadustat; (F) roxadustat; (G) enarodustat.**



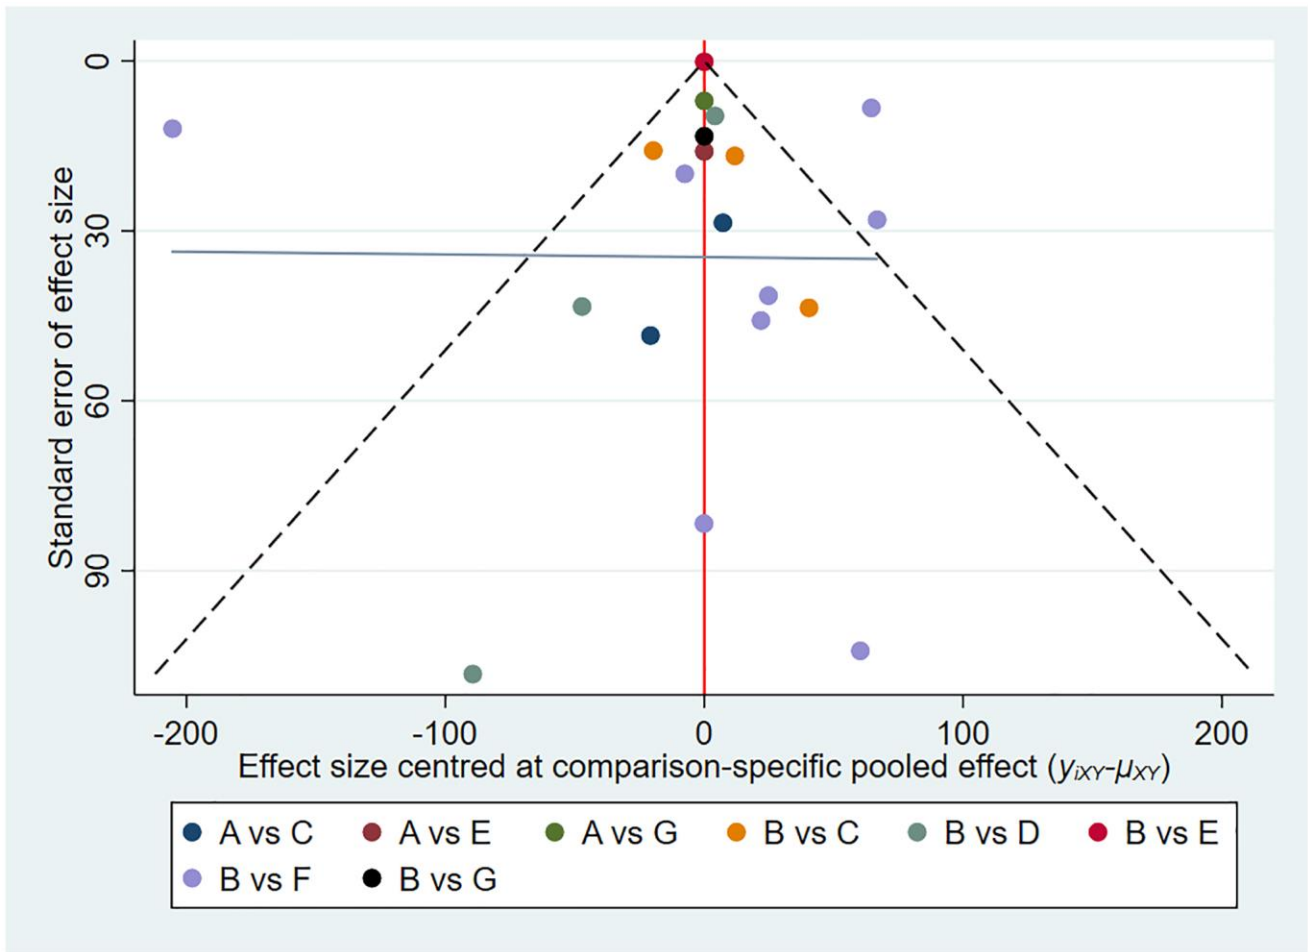

**Supplementary Figure 16. Funnel plot assessing ferritin.** Abbreviations: A: placebo/control; B: ESAs; C: daprodustat; D: molidustat; E: vadadustat; F: roxadustat; G: enarodustat.

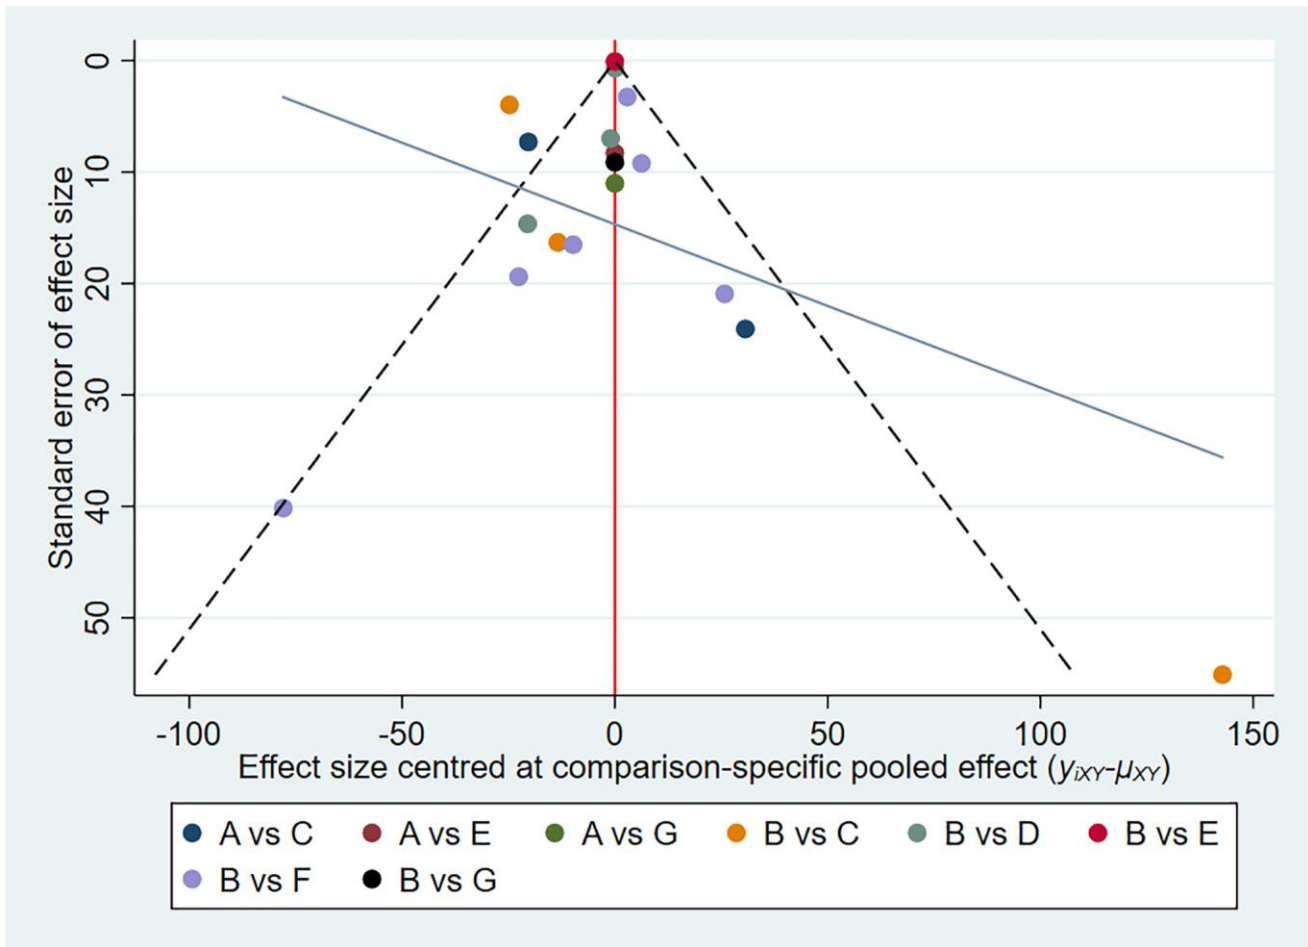

**Supplementary Figure 17. Funnel plot evaluating hepcidin.** Abbreviations: A: placebo/control; B: ESAs; C: daprodustat; D: molidustat; E: vadadustat; F: roxadustat; G: enarodustat.

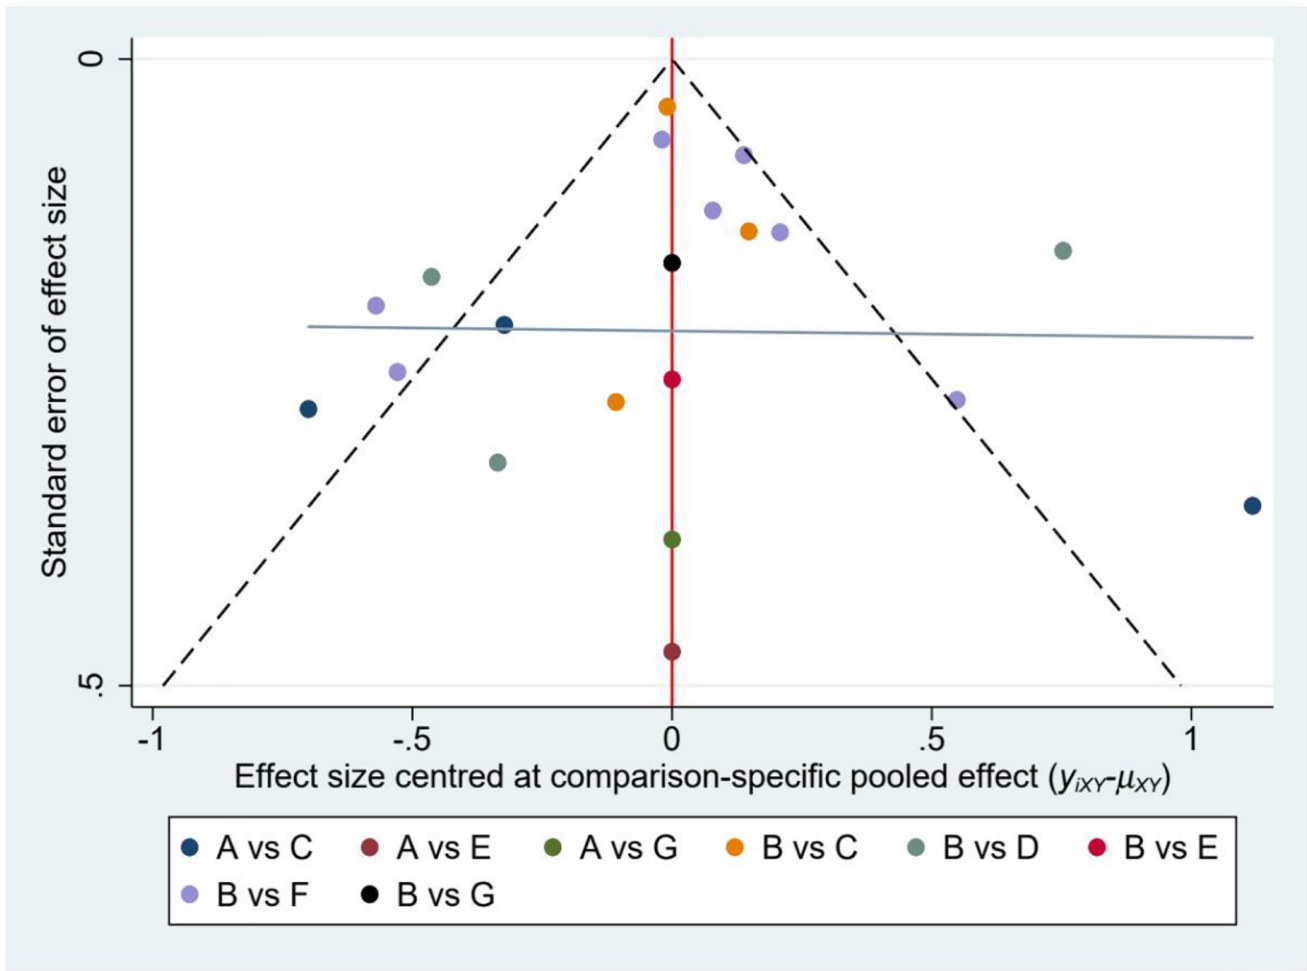

**Supplementary Figure 18. Funnel plot evaluating TIBC.** Abbreviations: A: placebo/control; B: ESAs; C: daprodustat; D: molidustat; E: vadadustat; F: roxadustat; G: enarodustat.

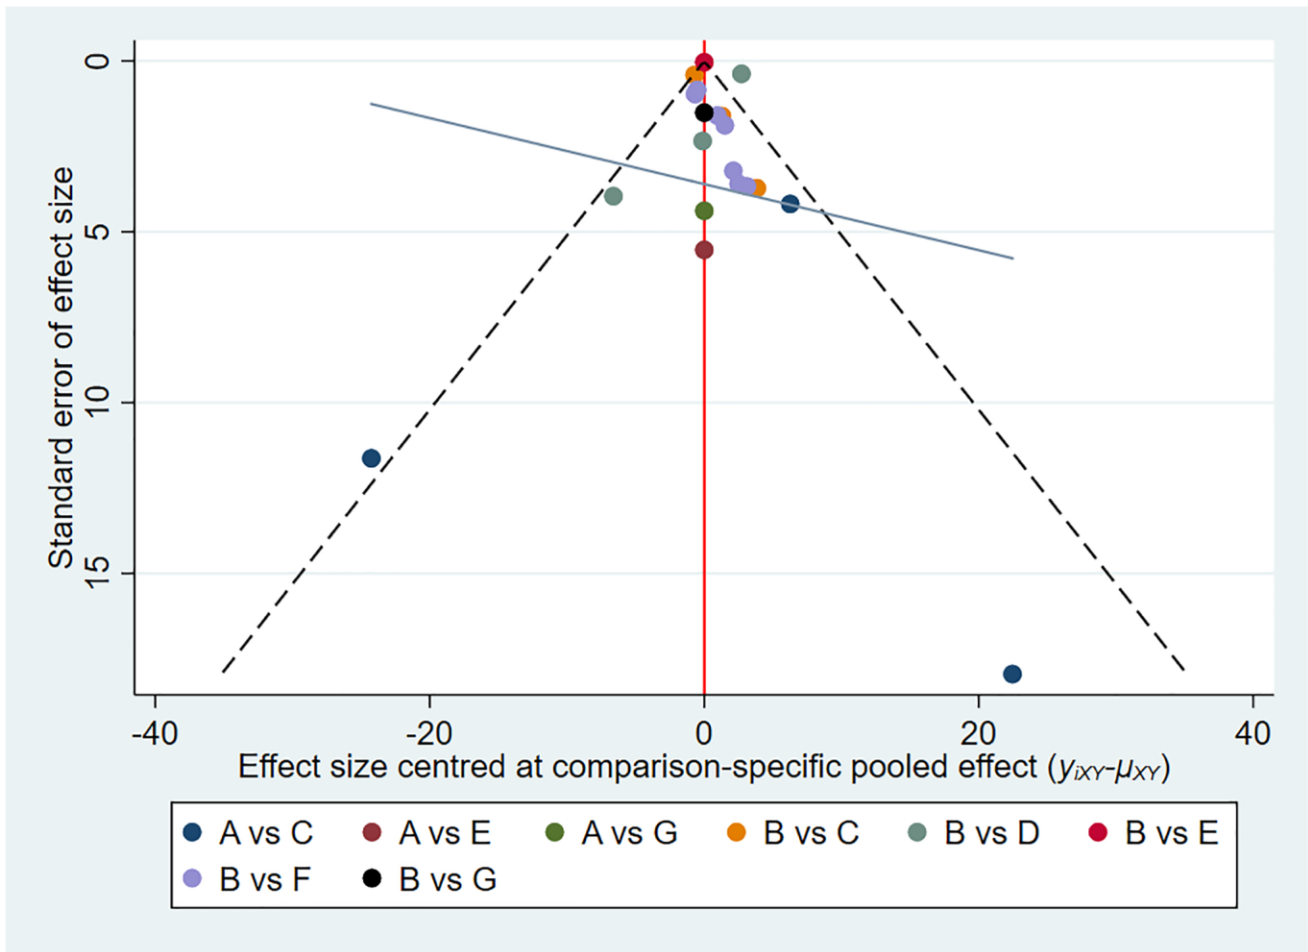

**Supplementary Figure 19. Funnel plot evaluating TSAT.** Abbreviations: A: placebo/control; B: ESAs; C: daprodustat; D: molidustat; E: vadadustat; F: roxadustat; G: enarodustat.

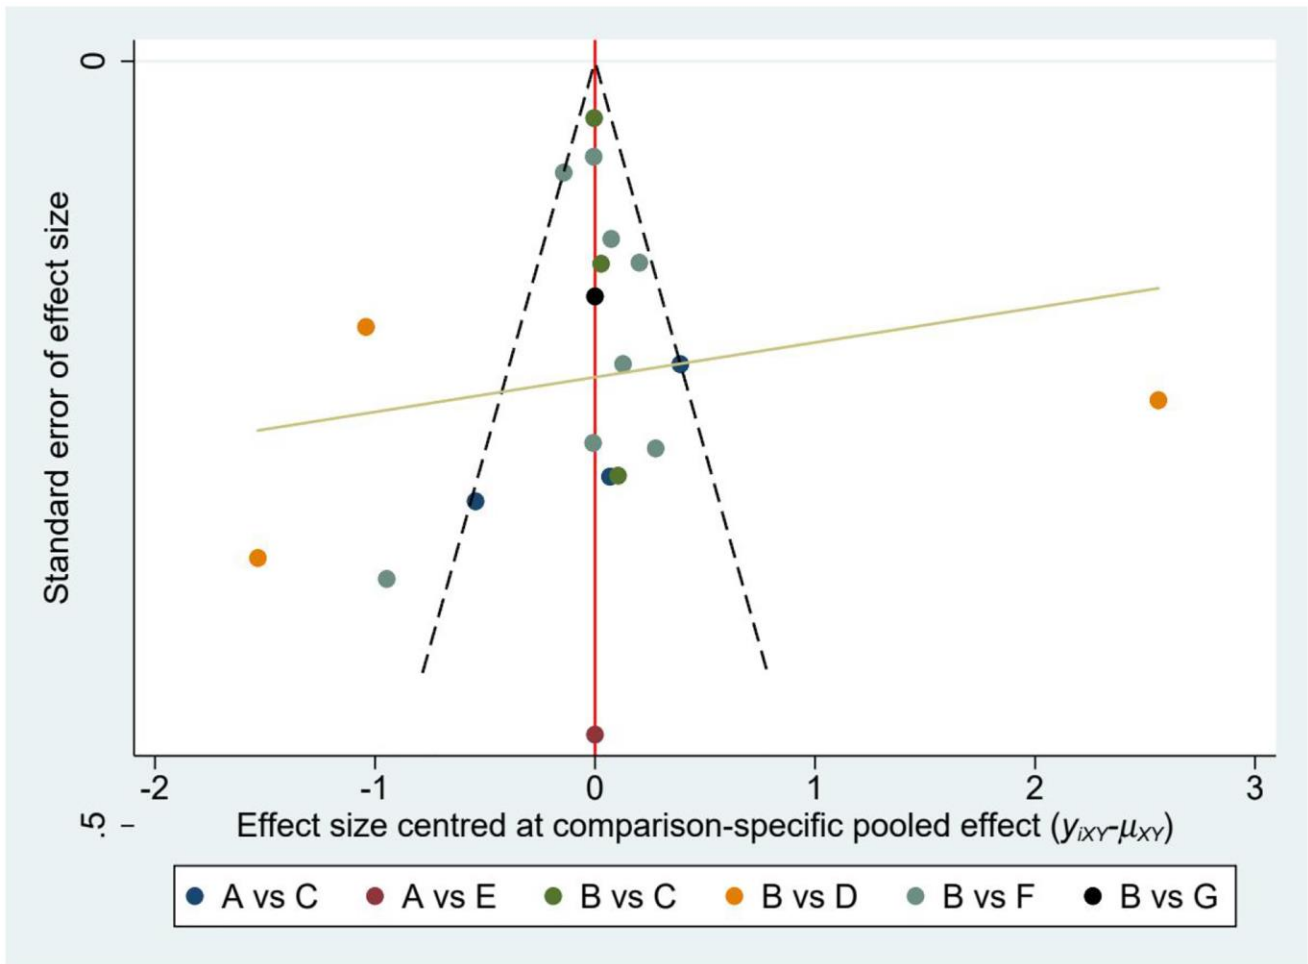

**Supplementary Figure 20. Funnel plot evaluating serum iron.** Abbreviations: A: placebo/control; B: ESAs; C: daprodustat; D: molidustat; E: vadadustat; F: roxadustat; G: enarodustat.

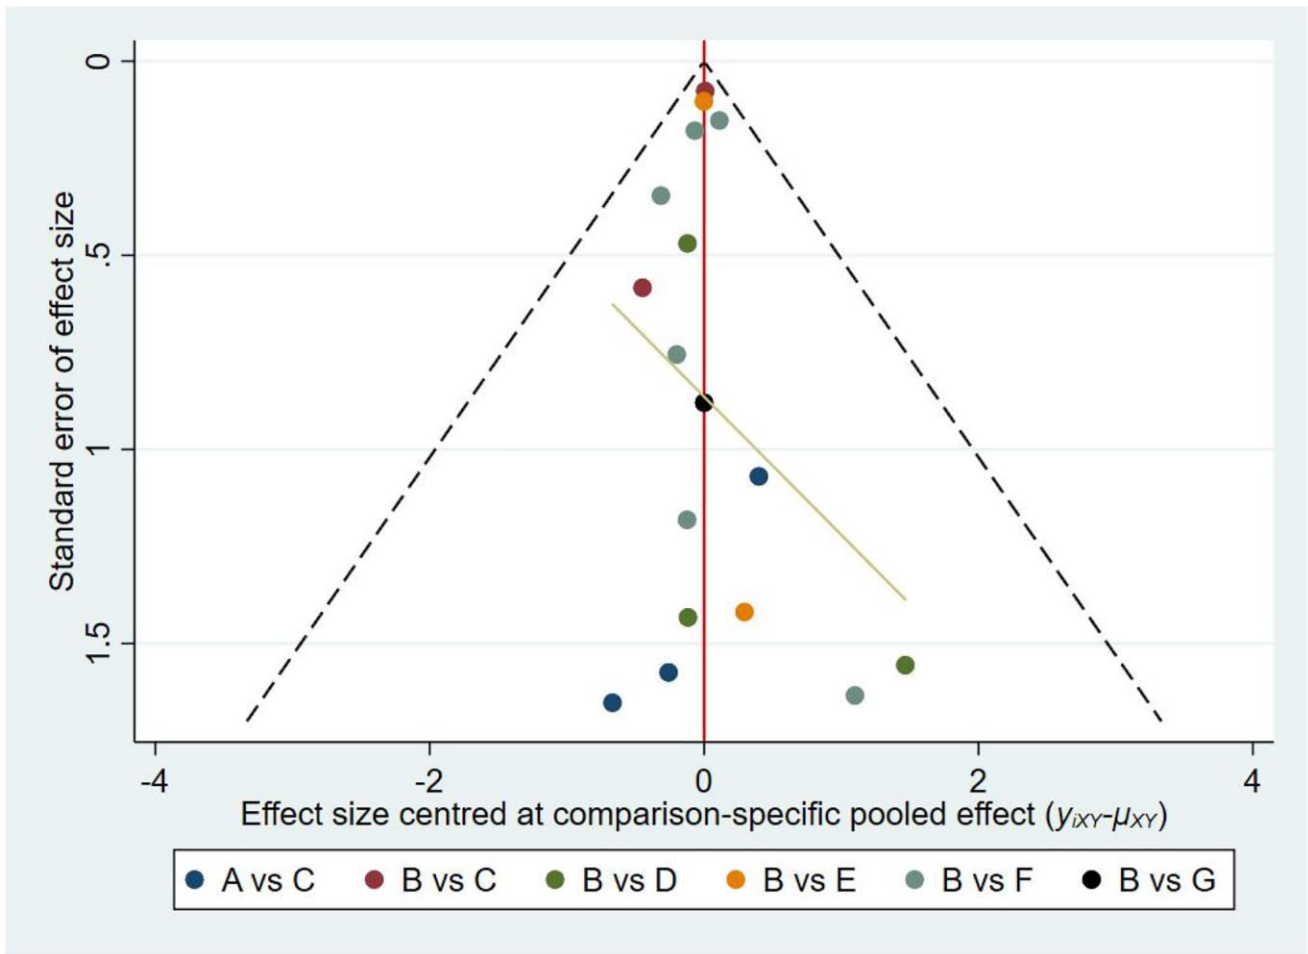

**Supplementary Figure 21. Funnel plot evaluating hypertension.** Abbreviations: A: placebo/control; B: ESAs; C: daprodustat; D: molidustat; E: vadadustat; F: roxadustat; G: enarodustat.

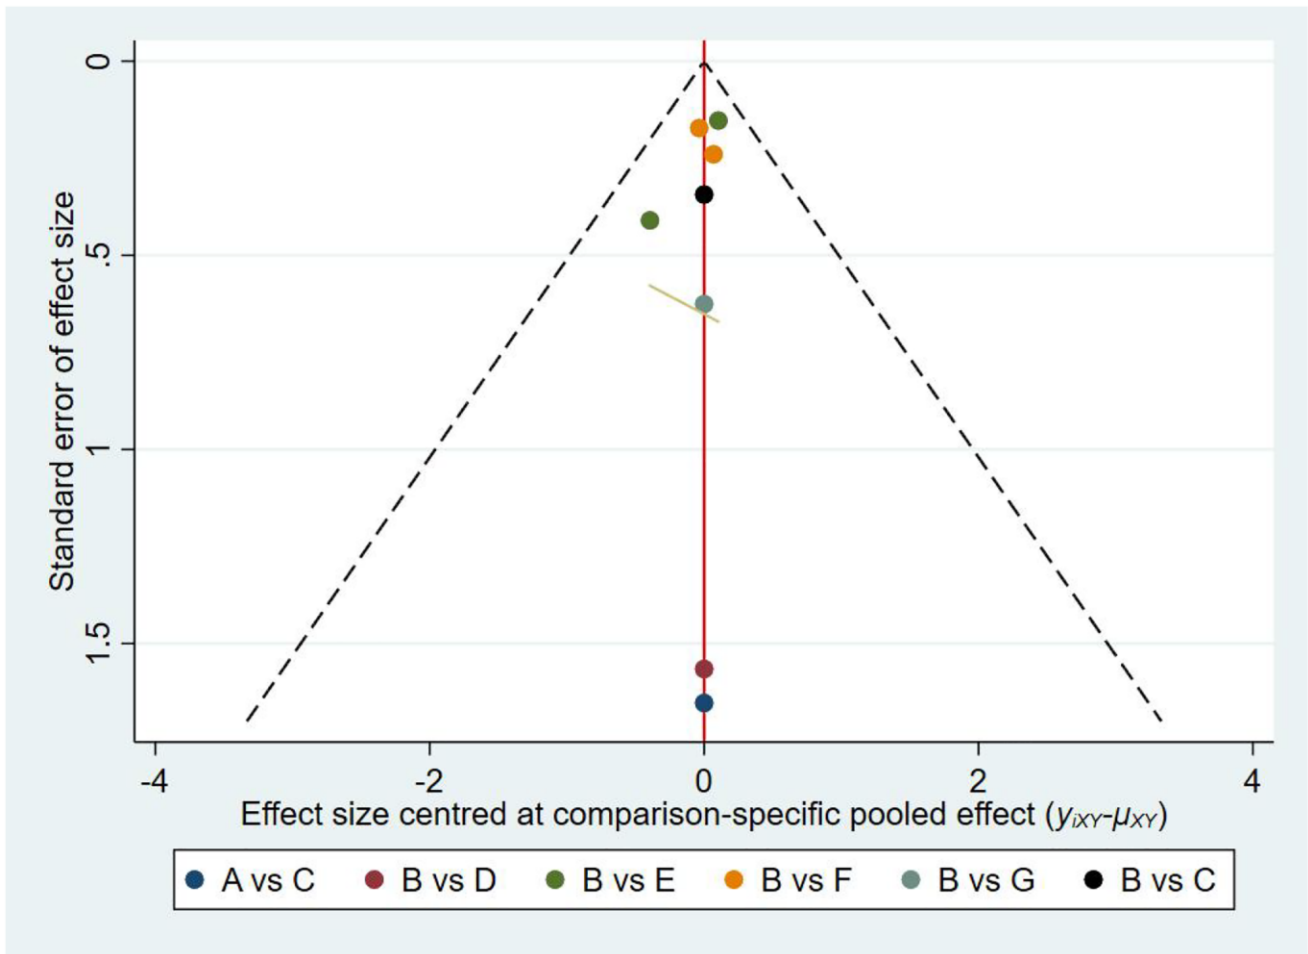

**Supplementary Figure 22. Funnel plot evaluating thrombosis.** Abbreviations: A: placebo/control; B: ESAs; C: daprodustat; D: molidustat; E: vadadustat; F: roxadustat; G: enarodustat.
