# Supplementary material for: A network meta-analysis of the efficacy of hypoxia-inducible factor prolyl-hydroxylase inhibitors in dialysis chronic kidney disease
Source: publisher site journal article supplement (doi:10.18632/aging.204611), 2023-03-27
Supplement: Supplementary file [file aging-v15i6-204611-supplementary-material-SD2.pdf]

| Author /year                           | <i>Holdstock/2016</i> |                   | <i>Meadowcroft/2018</i> |                    | <i>Singh/2021</i> |                    | <i>Akizawa/2020</i> |               |
|----------------------------------------|-----------------------|-------------------|-------------------------|--------------------|-------------------|--------------------|---------------------|---------------|
| Characteristic                         | Daprodustat           | rhEPO             | Daprodustat             | Control            | Daprodusta        | ESA                | Roxadustat          | DA            |
| Number                                 | 62                    | 20                | 171                     | 39                 | 1487              | 1477               | 150                 | 151           |
| Age- years±SD                          | 57.8±16.8             | 64.2±12.8         | 59.6±13.3               | 59.7±18.7          | 58 (48-67)        | 58 (47-68)         | 64.6 (11.7)         | 64.9(10.1)    |
| BMI, kg/m <sup>2</sup>                 | 30±8                  | 29±8              | 27.7±7.5                | 27.2±5.8           | 26.8 (23.0-31.2)  | 26.8(23.2-31.3)    | NA                  | NA            |
| Men (%)                                | 43 (69)               | 16 (80)           | 108 (63)                | 26 (67)            | 851 (57.2)        | 847 (57.3)         | 101 (67.3)          | 107 (70.9)    |
| Double-blind                           | Yes                   |                   | Yes                     |                    | No                |                    | Yes                 |               |
| Ferritin, µg/l                         | 734.96±386.8          | 441.76±252.4      | 585.1±429.7             | 459.0±261.0        | 589 (344–976)     | 604 (341–948)      | 102.31(83.45)       | 96.28 (75.14) |
| Transferrin, g/dl                      | 1.96±0.4              | 1.76±0.5          | NA                      | NA                 | NA                | NA                 | 1.802(0.327)        | 1.810(0.297)  |
| TIBC, µmol/l                           | 44.66±8.5             | 41.16±8.9         | 41.6±6.6                | 41.2±7.2           | 39 (34–43)        | 39 (34–43)         | 43.4 (7.0)          | 43.5 (6.2)    |
| Serum iron, µmol/l                     | 12.56±5.5             | 12.86±3.4         | 13.4±6.1                | 13.4±4.9           | 13 (10–16)        | 13 (10–16)         | 12.1 (5.1)          | 12.6 (4.5)    |
| Hepcidin, µg/l                         | 483.1(93.5,1241.8)    | 286.3(61.5,893.7) | 388.2(352.9,427.1)      | 334.4(274.7,407.1) | 172.7(109.3-256)  | 179.6(108.4–251.9) | NA                  | NA            |
| TSAT, %                                | 32.66±12.0            | 28.46±12.3        | 29.6(27.9, 31.5)        | 30.7(27.0, 35.0)   | 33 (26–41)        | 32 (26–42)         | 28.28 (11.70)       | 29.04 (10.18) |
| Hgb, g/dl                              | NA                    | NA                | 10.4 (0.66)             | 10.6 (0.94)        | 10.35±0.97        | 10.39±0.98         | 11.02 (0.56)        | 11.01 (0.60)  |
| Hypertension, n (%)                    | 19 (95)               | 20 (100)          | 160 (90)                | 37 (95)            | 1366 (91.9)       | 1373 (93.0)        | NA                  | NA            |
| Diabetes, n (%)                        | 8 (40)                | 11 (55)           | 62 (35)                 | 18 (46)            | 615 (41.4)        | 617 (41.8)         | 54 (36.0)           | 54 (35.8)     |
| Myocardial infarction n(%)             | NA                    | NA                | NA                      | NA                 | 122 (8.2)         | 135 (9.1)          | NA                  | NA            |
| Hemofiltration/Hemodiafiltration, n(%) | 0(0)                  | 0(0)              | 57(32)                  | 7(18)              | 0(0)              | 0(0)               | 0(0)                | 0(0)          |
| Hemodialysis, n(%)                     | 62(100)               | 20(100)           | 120(68)                 | 33(85)             | 1316 (88.5)       | 1308 (88.6)        | 150(100)            | 151(100)      |
| Peritoneal dialysis, n(%)              | 0(0)                  | 0(0)              | 0(0)                    | 0(0)               | 171 (11.5)        | 169 (11.4)         | 0(0)                | 0(0)          |

| Author /year                           | <i>Barratt/2021</i> |              | <i>Chen/2017</i> |            | <i>Chen/2019</i> |              | <i>Chen/2021</i> |
|----------------------------------------|---------------------|--------------|------------------|------------|------------------|--------------|------------------|
| Characteristic                         | Roxadustat          | ESA          | Roxadustat       | rhEPO      | Roxadustat       | Epoetin alfa | All populations  |
| Number                                 | 2354                | 2360         | 74               | 22         | 204              | 100          | 55               |
| Age- years±SD                          | 55.5±14.9           | 56.3±14.6    | 50.8±12.6        | 53.8±10.0  | 47.6±11.7        | 51.0±11.8    | 47.6 6 10.3      |
| BMI, kg/m <sup>2</sup>                 | NA                  | NA           | NA               | NA         | NA               | NA           | 25.0 6 3.5       |
| Men (%)                                | 1365 (58)           | 1379 (58.4)  | 45 (61)          | 13 (59.1)  | 126 (61.8)       | 58 (58)      | 26 (47.3)        |
| Double-blind                           | No                  |              | No               |            | No               |              | No               |
| Ferritin, µg/l                         | NA                  | NA           | 450.5(369.8)     | 458(361)   | 498.5±487.4      | 420.1±406.8  | 393.2±254.8      |
| Transferrin, g/dl                      | NA                  | NA           | 189.3(45.5)      | 187(35)    | 1.89±0.46        | 1.91±0.39    | 1.7±0.5          |
| TIBC,µmol/l                            | NA                  | NA           | 217.3(50.2)      | 214(38)    | 47.4±11.4        | 48.3±9.0     | NA               |
| Serum iron, µmol/l                     | NA                  | NA           | 71.5(32.9)       | 79(31.9)   | NA               | NA           | 12.2±7.0         |
| Hepcidin, µg/l                         | NA                  | NA           | 176.3(120.6)     | 209(127.1) | NA               | NA           | NA               |
| TSAT, %                                | NA                  | NA           | 31.56(16.91)     | 34.1(14.6) | 33.8±16.6        | 30.0±13.8    | NA               |
| Hgb, g/dl                              | 10.32 (0.99)        | 10.37 (0.99) | 10.6(1.0)        | 10.8(0.7)  | 10.4±0.7         | 10.5±0.7     | 7.8±1.3          |
| Hypertension, n (%)                    | 684 (29.1)          | 707 (30.0)   | NA               | NA         | NA               | NA           | 18 (32.7)        |
| Diabetes, n (%)                        | 799 (33.9)          | 813 (34.4)   | NA               | NA         | 30 (14.7)        | 17 (17.0)    | NA               |
| Myocardial infarction n(%)             | NA                  | NA           | NA               | NA         | NA               | NA           | NA               |
| Hemofiltration/Hemodiafiltration, n(%) | NA                  | NA           | 0(0)             | 0(0)       | 0(0)             | 0(0)         | NA               |
| Hemodialysis, n(%)                     | 2137 (90.8)         | 2156 (91.4)  | 74(100)          | 22(100)    | 182 (89.2)       | 89 (89.0)    | NA               |
| Peritoneal dialysis, n(%)              | 0(0)                | 0(0)         | 0(0)             | 0(0)       | 22 (10.8)        | 11 (11.0)    | NA               |

| Author /year                           | <i>Csiký/2021</i> |              | <i>Hou/2021</i> |             | <i>Provenzano/2016</i> |               | <i>Provenzano/2021</i> |                 |
|----------------------------------------|-------------------|--------------|-----------------|-------------|------------------------|---------------|------------------------|-----------------|
| Characteristic                         | Roxadustat        | ESA          | Roxadustat      | ESAs        | Roxadustat             | Epoetin alfa  | Roxadustat             | Epoetin alfa    |
| Number                                 | 414               | 420          | 86              | 43          | 67                     | 23            | 522                    | 521             |
| Age- years±SD                          | 61.0±13.8         | 61.8±13.4    | 48±12           | 48.3±13     | 56.9±12.1              | 57.0±11.6     | 53.8±14.7              | 54.3±14.6       |
| BMI, kg/m <sup>2</sup>                 | 26.87 (4.86)      | 26.95 (5.59) | 23.7±3.5        | 24.1±3.2    | NA                     | NA            | NA                     | NA              |
| Men (%)                                | 245 (59.2)        | 235 (56)     | 47 (55)         | 25 (58)     | 45 (67)                | 14 (61)       | 309 (59.2)             | 307 (58.9)      |
| Double-blind                           | No                |              | Yes             |             | No                     |               | No                     |                 |
| Ferritin, µg/l                         | NA                | NA           | 268.8±297.2     | 257.4±190.8 | 827.7±474.3            | 1,065.8±657.2 | 441.4 (337.0)          | 437.4 (311.4)   |
| Transferrin, g/dl                      | NA                | NA           | 2.0±0.5         | 1.9±0.6     | NA                     | NA            | NA                     | NA              |
| TIBC, µmol/l                           | NA                | NA           | 42.5±11.7       | 41.3±14.9   | 199.7±34.0             | 202.1±26.7    | 241.04 (43.00)         | 238.06 (37.04)  |
| Serum iron, µmol/l                     | NA                | NA           | 12.6±5.0        | 11.4±5.0    | 66.4±20.6              | 63.3±32.0     | 64.41 (24.24)          | 65.52 (24.15)   |
| Hepcidin, µg/l                         | NA                | NA           | NA              | NA          | 327.1±178.8            | 298.7±123.1   | 173.21 (120.21)        | 169.91 (127.98) |
| TSAT, %                                | NA                | NA           | 31.3±14.2       | 29.6±13.2   | 29.2±10.0              | 28.1±14.4     | 27.0 (9.3)             | 27.6 (8.9)      |
| Hgb, g/dl                              | 10.75 (0.62)      | 10.78 (0.62) | 9.0±1.4         | 9.0±1.2     | 11.2±0.7               | 11.2±1.0      | 8.4 (1.0)              | 8.5 (1.0)       |
| Hypertension, n (%)                    | 124 (30.0)        | 120 (28.6)   | 29 (34)         | 14 (33)     | 66(100)                | 22(100)       | 505 (96.7)             | 504 (96.7)      |
| Diabetes, n (%)                        | 74 (17.9)         | 95 (22.6)    | 12 (14)         | 8 (19)      | 39(59)                 | 14(64)        | 205 (39.3)             | 204 (39.2)      |
| Myocardial infarction n(%)             | NA                | NA           | NA              | NA          | NA                     | NA            | 33 (6.3)               | 33 (6.3)        |
| Hemofiltration/Hemodiafiltration, n(%) | 0(0)              | 0(0)         | 0(0)            | 0(0)        | 0(0)                   | 0(0)          | 0(0)                   | 0(0)            |
| Hemodialysis, n(%)                     | 379 (91.5)        | 405 (96.4)   | 0(0)            | 0(0)        | 67(100)                | 23(100)       | 469 (89.8)             | 462 (88.7)      |
| Peritoneal dialysis, n(%)              | 35 (8.5)          | 15 (3.6)     | 86(100)         | 43(100)     | 0(0)                   | 0(0)          | 53 (10.2)              | 58 (11.1)       |



| Author /year                           | Akizawa/2019     |                   | Akizawa/2021     |                  | Eckardt/2021 |             | Nangaku/2020 |              | Nangaku/2021 |            |
|----------------------------------------|------------------|-------------------|------------------|------------------|--------------|-------------|--------------|--------------|--------------|------------|
| Characteristic                         | Enarodusta       | Placebo           | Enarodusta       | DA               | Vadadustat   | DA          | Vadadusta    | Placebo      | Vadadustat   | DA         |
| Number                                 | 60               | 22                | 86               | 86               | 1777         | 1777        | 44           | 14           | 162          | 161        |
| Age- years±SD                          | 61.9 ± 11.2      | 60.7 ± 13.0       | 63.2 ± 10.8      | 64.8 ± 10.3      | 57.9±13.9    | 58.4±13.8   | 63.3±9.2     | 65.7±11.6    | 66.0±11.3    | 64.9±11.7  |
| BMI, kg/m2                             | NA               | NA                | NA               | NA               | NA           | NA          | 24±4.5       | 22.4±4       | 22.4±3.4     | 22.4±4.5   |
| Men (%)                                | 45 (75)          | 15 (68)           | 61 (70.9)        | 61 (70.9)        | 990 (55.7)   | 1004 (56.5) | 32 (73)      | 8 (57)       | 104 (64.2)   | 109 (67.7) |
| Double-blind                           | Yes              |                   | Yes              |                  | No           |             | Yes          |              | Yes          |            |
| Ferritin, µg/l                         | 98.6(36.7,169)   | 81.0(37.9, 115.0) | 90.90(12.3,794)  | 90.30(12.4, 609) | NA           | NA          | 217.8(113)   | 294.6(215)   | 144.5±139.6  | 140.0±95.3 |
| Transferrin, g/dl                      | NA               | NA                | NA               | NA               | NA           | NA          | NA           | NA           | NA           | NA         |
| TIBC, µmol/l                           | 231.5(207,250)   | 248.0(216.0,273)  | 233.0 (179, 241) | 243.0 (172, 261) | NA           | NA          | 233.3(35.6)  | 207.6(34.2)  | NA           | NA         |
| Serum iron, µmol/l                     | 63.5 (52.0, 77)  | 62.5 (52.0, 76)   | 65.5(33, 144)    | 64.0 (9, 167)    | NA           | NA          | 98.5 (31.5)  | 100.9 (25.5) | NA           | NA         |
| Hepcidin, µg/l                         | 64.9(37.0,156)   | 67.1 (24.6, 127)  | 70.5(0.34,309)   | 51.5(1.67, 218)  | NA           | NA          | 140.1(61.3)  | 184.6 (94.3) | NA           | NA         |
| TSAT, %                                | 27.5(23.3, 35.4) | 23.7 (22.1, 30)   | 27.0(11, 69)     | 27.0 (4, 64)     | NA           | NA          | 43.63(16.6)  | 49.78 (15.4) | 28.6±10.6    | 26.9±9.4   |
| Hgb, g/dl                              | NA               | NA                | 10.79 (0.65)     | 10.87 (0.70)     | 10.6±0.9     | 10.2±0.8    | 9.0 (0.6)    | 9.0 (0.6)    | 10.73±0.7    | 10.73±0.7  |
| Hypertension, n (%)                    | NA               | NA                | NA               | NA               | NA           | NA          | 13 (29.5)    | 6 (42.9)     | 152 (93.8)   | 147 (91.3) |
| Diabetes, n (%)                        | 17(28.33)        | 2 (9.1)           | 31 (36.0)        | 36 (41.9)        | 971 (54.6)   | 998 (56.2)  | 19 (43)      | 5 (36)       | 35 (21.6)    | 49 (30.4)  |
| Myocardial infarction n(%)             | NA               | NA                | NA               | NA               | NA           | NA          | NA           | NA           | NA           | NA         |
| Hemofiltration/Hemodiafiltration, n(%) | NA               | NA                | 0(0)             | 0(0)             | NA           | NA          | NA           | NA           | NA           | NA         |
| Hemodialysis, n(%)                     | 60(100)          | 22(100)           | 86(100)          | 86(100)          | 1652 (93.0)  | 1633 (91.9) | NA           | NA           | NA           | NA         |
| Peritoneal dialysis, n(%)              | NA               | NA                | 0(0)             | 0(0)             | 137 (7.7)    | 143 (8.0)   | NA           | NA           | NA           | NA         |

DA: darbepoetine; BMI: body mass index; TIBC: total iron-binding capacity; TSAT: transferrin saturation; Hgb: hemoglobin
