# Supplementary material for: A network meta-analysis of the efficacy of hypoxia-inducible factor prolyl-hydroxylase inhibitors in dialysis chronic kidney disease
Source: publisher site journal article supplement (doi:10.18632/aging.204611), 2023-03-27
Supplement: Supplementary file [file aging-v15i6-204611-supplementary-material-SD3.pdf]

## SUPPLEMENTARY TABLES

**Supplementary Table 2. Node-splitting approach for inconsistency assessment of all comparisons.**

| Side    | Direct |      | Indirect |       | Difference |       | P    |
|---------|--------|------|----------|-------|------------|-------|------|
|         | Coef   | Std  | Coef     | Std   | Coef       | Std   |      |
| A vs. C | 1.07   | 0.21 | 1.54     | 0.34  | -0.48      | 0.39  | 0.23 |
| A vs. E | 1.54   | 0.28 | 0.94     | 0.31  | 0.59       | 0.41  | 0.15 |
| A vs. G | 1.51   | 0.49 | 1.62     | 0.39  | -0.11      | 0.62  | 0.86 |
| B vs. C | -0.06  | 0.17 | -0.54    | 0.36  | 0.48       | 0.39  | 0.23 |
| B vs. D | -0.05  | 0.20 | -2.68    | 314.9 | 2.62       | 314.9 | 0.99 |
| B vs. E | -0.20  | 0.20 | 0.39     | 0.36  | -0.59      | 0.41  | 0.15 |
| B vs. F | 0.32   | 0.11 | -2.76    | 111.1 | 3.08       | 111.1 | 0.98 |
| B vs. G | 0.27   | 0.32 | 0.16     | 0.54  | 0.11       | 0.86  | 0.86 |

Abbreviations: Coef: coefficient; Std: standard deviation; A: placebo/control; B: ESAs; C: daprodustat; D: molidustat; E: vadadustat; F: roxadustat; G: enarodustat.

**Supplementary Table 3. Ranking probabilities, mean ranks, and SUCRA values.**

|                   | placebo | ESAs | daprodustat | molidustat | vadadustat | roxadustat | enarodustat |
|-------------------|---------|------|-------------|------------|------------|------------|-------------|
| <b>Hemoglobin</b> |         |      |             |            |            |            |             |
| Best              | 0       | 0    | 0.2         | 3.1        | 1.7        | 57.4       | 37.5        |
| 2nd               | 0       | 7.1  | 2.6         | 11.3       | 8.7        | 36.9       | 33.4        |
| 3rd               | 0       | 33   | 9.1         | 20.7       | 20.1       | 5.1        | 12          |
| SUCRA             | 0       | 53.9 | 33.7        | 46.4       | 44.8       | 91.8       | 79.4        |
| PrBest            | 0       | 0    | 0.2         | 3.1        | 1.7        | 57.4       | 37.5        |
| Mean Rank         | 7       | 3.8  | 5           | 4.2        | 4.3        | 1.5        | 2.2         |
| <b>Ferritin</b>   |         |      |             |            |            |            |             |
| Best              | 0       | 0.3  | 10          | 6          | 11.5       | 63.9       | 8.3         |
| 2nd               | 0.1     | 13.6 | 23.6        | 11.6       | 15.7       | 22.8       | 12.6        |
| 3rd               | 0.6     | 30.4 | 21.9        | 10.9       | 14.2       | 9.2        | 12.8        |
| SUCRA             | 6.5     | 54.7 | 60.9        | 40.3       | 51.0       | 90.9       | 45.8        |
| PrBest            | 0       | 0.3  | 10.0        | 6.0        | 11.5       | 63.9       | 8.3         |
| Mean Rank         | 6.6     | 3.7  | 3.3         | 4.6        | 3.9        | 1.5        | 4.3         |
| <b>Hepcidin</b>   |         |      |             |            |            |            |             |
| Best              | 0       | 0    | 18.9        | 2.1        | 10.6       | 23.5       | 44.9        |
| 2nd               | 0       | 0.1  | 26          | 6.0        | 15.8       | 28.5       | 23.5        |
| 3rd               | 0       | 2.8  | 25.4        | 11.3       | 21.5       | 24.4       | 14.7        |
| SUCRA             | 1.7     | 29.8 | 69.6        | 37.9       | 56.2       | 74         | 80.9        |
| PrBest            | 0       | 0    | 18.9        | 2.1        | 10.6       | 23.5       | 44.9        |
| Mean Rank         | 6.9     | 5.2  | 2.8         | 4.7        | 3.6        | 2.6        | 2.1         |
| <b>TSAT</b>       |         |      |             |            |            |            |             |
| Best              | 0       | 17.2 | 6.1         | 0          | 0.5        | 6.7        | 69.5        |
| 2nd               | 0       | 55.5 | 13.2        | 0.3        | 2.4        | 17.8       | 10.8        |
| 3rd               | 0       | 21.8 | 22.1        | 2.2        | 8.5        | 37.3       | 8.1         |
| SUCRA             | 0       | 80.7 | 56.3        | 20.6       | 39.9       | 63.7       | 88.7        |
| PrBest            | 0       | 17.2 | 6.1         | 0          | 0.5        | 6.7        | 69.5        |
| Mean Rank         | 7.0     | 2.2  | 3.6         | 5.8        | 4.6        | 3.2        | 1.7         |
| <b>TIBC</b>       |         |      |             |            |            |            |             |

|              |      |      |      |      |      |      |      |
|--------------|------|------|------|------|------|------|------|
| Best         | 0    | 0    | 0    | 0    | 92.6 | 0    | 7.3  |
| 2nd          | 0    | 0    | 7.7  | 3.1  | 7.3  | 3.1  | 78.7 |
| 3rd          | 0.4  | 0    | 50.7 | 15.3 | 0.1  | 24.6 | 8.8  |
| SUCRA        | 12.2 | 14.0 | 58.1 | 37.3 | 98.7 | 48.7 | 80.9 |
| PrBest       | 0    | 0    | 0    | 0    | 92.6 | 0    | 7.3  |
| Mean Rank    | 6.3  | 6.2  | 3.5  | 4.8  | 1.1  | 4.1  | 2.1  |
| Serum iron   |      |      |      |      |      |      |      |
| Best         | 5.6  | 27.2 | 4.7  | 0.9  | 25.6 | 11.7 | 24.3 |
| 2nd          | 11.2 | 36.3 | 8.8  | 2.0  | 8.5  | 22.7 | 10.5 |
| 3rd          | 11.2 | 21.0 | 19.1 | 5.7  | 7.5  | 23.1 | 12.4 |
| SUCRA        | 41.0 | 78.3 | 48.0 | 20.5 | 48.0 | 61.3 | 52.9 |
| PrBest       | 5.6  | 27.2 | 4.7  | 0.9  | 25.6 | 11.7 | 24.3 |
| Mean Rank    | 4.5  | 2.3  | 4.1  | 5.8  | 4.1  | 3.3  | 3.8  |
| Hypertension |      |      |      |      |      |      |      |
| Best         | 36.8 | 0    | 0.1  | 45   | 12.4 | 0.2  | 5.6  |
| 2nd          | 17.4 | 0.4  | 3.1  | 29.9 | 42.3 | 1.7  | 5.2  |
| 3rd          | 9.1  | 5.7  | 20.4 | 10.6 | 38   | 11.1 | 5.1  |
| SUCRA        | 63.3 | 33.2 | 45.6 | 80.7 | 76.5 | 33.9 | 16.9 |
| PrBest       | 36.8 | 0    | 0.1  | 45   | 12.4 | 0.2  | 5.6  |
| Mean Rank    | 3.2  | 5.0  | 4.3  | 2.2  | 2.4  | 5.0  | 6.0  |
| Thrombosis   |      |      |      |      |      |      |      |
| Best         | 1.0  | 43.6 | 0.2  | 23.5 | 1.7  | 0.0  | 30.0 |
| 2nd          | 0.7  | 44.4 | 1.0  | 5.8  | 26.3 | 3.8  | 18.0 |
| 3rd          | 0.7  | 11.4 | 3.4  | 5.2  | 43.4 | 22.4 | 13.5 |
| SUCRA        | 4.6  | 88.5 | 29.6 | 44.2 | 65.9 | 49.3 | 67.9 |
| PrBest       | 1.0  | 43.6 | 0.2  | 23.5 | 1.7  | 0.0  | 30.0 |
| Mean Rank    | 6.7  | 1.7  | 5.2  | 4.4  | 3.0  | 4.0  | 2.9  |

Abbreviations: SUCRA: surface under the cumulative ranking curve; ESAs: erythropoiesis-stimulating agents; TSAT: transferrin saturation; TIBC: total iron-binding capacity.
